# Supplementary material for: Palladium-catalyzed substrate-switchable C–H alkenylation and alkylation of benzoic acids using MBH alcohols
Source: Royal Society of Chemistry journal article supplement (doi:10.1039/d4cc06691j), 2025-01-01

Supporting Information

**Palladium-catalyzed substrate-switchable C-H alkenylation and alkylation of benzoic acids using MBH alcohols**

**Table of Contents**

|    |                                                                                            |         |
|----|--------------------------------------------------------------------------------------------|---------|
| 1  | General Information                                                                        | S2      |
| 2  | Crystal Data and Structure Refinement for <b>3oa</b>                                       | S2-S3   |
| 3  | Optimization of Reaction Conditions                                                        | S4-S5   |
| 4  | General Procedure for the Preparation of MBH Alcohols                                      | S6-S7   |
| 5  | General Procedure for the Pd-Catalyzed C-H Alkenylation of Benzoic acids with MBH Alcohols | S8-S9   |
| 6  | General Procedure for the Pd-Catalyzed C-H Alkylation of Benzoic acids with MBH Alcohols   | S9-S10  |
| 7  | Procedures for the Post-Synthetic Transformations                                          | S10-S11 |
| 8  | Characterization Data                                                                      | S12-S31 |
| 9  | Mechanistic Investigations                                                                 | S31-S44 |
| 10 | References                                                                                 | S44-S45 |
| 11 | NMR ( <sup>1</sup> H, <sup>13</sup> C and <sup>19</sup> F) Spectra                         | S46-S97 |

**General Information.** Pd(OAc)<sub>2</sub>, Ag<sub>2</sub>CO<sub>3</sub>, Ag<sub>2</sub>O, AgOAc (≥99.99%), NaOAc (98%), KOAc (98%), Na<sub>2</sub>CO<sub>3</sub>, K<sub>2</sub>CO<sub>3</sub>, Cs<sub>2</sub>CO<sub>3</sub>, 2,2,2-trifluoroethanol (TFE), 2,2,2-trichloroethanol (TCE), 1,1,1,3,3,3-hexafluoroisopropanol (HFIP) and benzoic acids of Sigma-Aldrich, BLD Pharm and TCI chemicals were used as received. MeOH, CH<sub>2</sub>Cl<sub>2</sub> and (CH<sub>2</sub>Cl)<sub>2</sub> were dried prior as per the standard procedure. Silica gel-G/GF254 plates (Merck) were used for TLC analysis with a mixture of hexane and EtOAc as the eluent. Column chromatography was carried out using Rankem silica gel (60-120 mesh). Bruker Avance III 400, 500 and 600 MHz NMR spectrometers were used to record (<sup>1</sup>H, <sup>13</sup>C and <sup>19</sup>F) spectra using CDCl<sub>3</sub> and DMSO-d<sub>6</sub> as the solvent and tetramethylsilane (TMS) as an internal standard. Chemical shifts (δ) and spin-spin coupling constant (*J*) are reported in parts per million and hertz (Hz), respectively, and to describe peak patterns following abbreviations were used when appropriate: s = singlet, d = doublet, t = triplet, dd = doublet of doublets and m = multiplet. Melting point of the products was measured on Büchi melting point apparatus, MPB-540. Open capillary tubes were used for the measurements and are uncorrected. Mestre nova software was used throughout the spectral analysis. Q-ToF ESI-MS instrument (model HAB273) was used for recording HRMS data. Infrared spectra were recorded on Perkin Elmer FT-IR instrument. Single crystal X-ray data were collected on a Bruker SMART APEX equipped with a CCD area detector using Mo/K $\alpha$  radiation and the structure was solved by direct method using SHELXL-18 (Göttingen, Germany).

#### Crystal Data and Structure Refinement for **30a**.

**Sample Preparation for Crystal Growth.** The compound **30a** was dissolved in minimum volume of acetonitrile and kept at room temperature for slow evaporation (2 days). Block shaped crystals were formed. The single crystal was subjected to X-ray diffraction.

#### Crystal Data and Structure Refinement for **30a**.

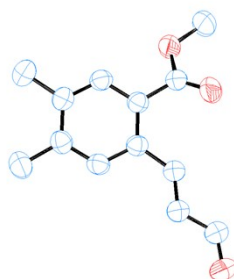

**Figure S1.** ORTEP diagram of **Methyl (*E*)-4,5-dimethyl-2-(3-oxoprop-1-en-1-yl)benzoate **30a**** (CCDC No 2368719) with 50% ellipsoid. H-Atoms are omitted for clarity.

|                                                     |                                                                                                                                                                  |
|-----------------------------------------------------|------------------------------------------------------------------------------------------------------------------------------------------------------------------|
| CCDC                                                | <b>2368719</b>                                                                                                                                                   |
| Identification code                                 | <b>3oa</b>                                                                                                                                                       |
| Empirical formula                                   | C <sub>13</sub> H <sub>14</sub> O <sub>3</sub>                                                                                                                   |
| Formula weight                                      | 218.24                                                                                                                                                           |
| Crystal habit, colour                               | Block, Colorless                                                                                                                                                 |
| Temperature, <i>T</i> /K                            | 298 K                                                                                                                                                            |
| Wavelength, $\lambda/\text{\AA}$                    | 0.71073 $\text{\AA}$                                                                                                                                             |
| Crystal system                                      | Triclinic                                                                                                                                                        |
| Space group                                         | P -1                                                                                                                                                             |
| Unit cell dimensions                                | a = 8.402(3) $\text{\AA}$<br>b = 8.472(3) $\text{\AA}$<br>c = 9.245(4) $\text{\AA}$<br>$\alpha$ = 109.344(11)<br>$\beta$ = 101.143(11)<br>$\gamma$ = 100.258(11) |
| Volume, <i>V</i> / $\text{\AA}^3$                   | 588.0                                                                                                                                                            |
| <i>Z</i>                                            | 2                                                                                                                                                                |
| Calculated density, Mg·m <sup>-3</sup>              | 1.233                                                                                                                                                            |
| Absorption coefficient, $\mu/\text{mm}^{-1}$        | 0.087                                                                                                                                                            |
| <i>F</i> (000)                                      | 232                                                                                                                                                              |
| $\theta$ range for data collection                  | 2.426 to 26.001                                                                                                                                                  |
| Limiting indices                                    | -10 ≤ <i>h</i> ≤ 10, -10 ≤ <i>k</i> ≤ 10, -11 ≤ <i>l</i> ≤ 11                                                                                                    |
| Reflection collected / unique                       | 2304/ 1770                                                                                                                                                       |
| Completeness to $\theta$                            | 99.3%                                                                                                                                                            |
| Absorption correction                               | Multi-scan                                                                                                                                                       |
| Refinement method                                   | SHELXL 2018/3 (Sheldrick, 2015)                                                                                                                                  |
| Data / restraints / parameters                      | 2304/ 0/ 148                                                                                                                                                     |
| Goodness-of-fit on <i>F</i> <sup>2</sup>            | 1.087                                                                                                                                                            |
| Final <i>R</i> indices [ <i>I</i> > 2σ( <i>I</i> )] | R1 = 0.0548, wR2 = 0.1271                                                                                                                                        |
| <i>R</i> indices (all data)                         | R1 = 0.0734, wR2 = 0.1416                                                                                                                                        |

**Table S1. Optimization of Reaction Conditions: C-H Alkenylation<sup>a</sup>**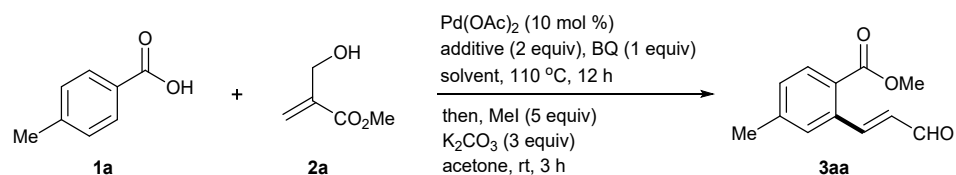

| entry           | additive                        | solvent                           | yield of <b>3aa</b> <sup>b</sup> (%) |
|-----------------|---------------------------------|-----------------------------------|--------------------------------------|
| 1               | Ag <sub>2</sub> CO <sub>3</sub> | HFIP                              | 72                                   |
| 2               | Na <sub>2</sub> CO <sub>3</sub> | HFIP                              | trace                                |
| 3               | K <sub>2</sub> CO <sub>3</sub>  | HFIP                              | 24                                   |
| 4               | Cs <sub>2</sub> CO <sub>3</sub> | HFIP                              | 30                                   |
| 5               | Ag <sub>2</sub> O               | HFIP                              | n.d.                                 |
| 6               | AgOAc                           | HFIP                              | n.d.                                 |
| 7               | NaOAc                           | HFIP                              | n.d.                                 |
| 8               | KOAc                            | HFIP                              | n.d.                                 |
| 9               | Ag <sub>2</sub> CO <sub>3</sub> | TFE                               | 58                                   |
| 10              | Ag <sub>2</sub> CO <sub>3</sub> | TCE                               | 56                                   |
| 11              | Ag <sub>2</sub> CO <sub>3</sub> | MeOH                              | 35                                   |
| 12              | Ag <sub>2</sub> CO <sub>3</sub> | EtOH                              | 20                                   |
| 13              | Ag <sub>2</sub> CO <sub>3</sub> | PhCF <sub>3</sub>                 | n.d.                                 |
| 14              | Ag <sub>2</sub> CO <sub>3</sub> | (CH <sub>2</sub> Cl) <sub>2</sub> | n.d.                                 |
| 15              | -                               | HFIP                              | n.d.                                 |
| 16 <sup>c</sup> | Ag <sub>2</sub> CO <sub>3</sub> | HFIP                              | n.d.                                 |
| 17 <sup>d</sup> | Ag <sub>2</sub> CO <sub>3</sub> | HFIP                              | n.d.                                 |
| 18 <sup>e</sup> | Ag <sub>2</sub> CO <sub>3</sub> | HFIP                              | 55                                   |
| 19 <sup>f</sup> | Ag <sub>2</sub> CO <sub>3</sub> | HFIP                              | 45                                   |
| 20 <sup>g</sup> | Ag <sub>2</sub> CO <sub>3</sub> | HFIP                              | n.d.                                 |
| 21 <sup>h</sup> | Ag <sub>2</sub> CO <sub>3</sub> | HFIP                              | n.d.                                 |
| 22 <sup>i</sup> | Ag <sub>2</sub> CO <sub>3</sub> | HFIP                              | n.d.                                 |

<sup>a</sup>Reaction conditions: **1a** (0.1 mmol), **2a** (0.11 mmol), Pd(OAc)<sub>2</sub> (10 mol %), Ag<sub>2</sub>CO<sub>3</sub> (2 equiv), BQ (1 equiv), Solvent (1 mL), 110 °C, 12 h, then MeI (5 equiv), K<sub>2</sub>CO<sub>3</sub> (3 equiv), acetone (1.5 mL) rt, 3h. <sup>b</sup>Isolated yield. <sup>c</sup>In absence of BQ. <sup>d</sup>In absence of Pd(OAc)<sub>2</sub>. <sup>e</sup>Ag<sub>2</sub>CO<sub>3</sub> (1 equiv). <sup>f</sup>At 80 °C. <sup>g</sup>Pd(TFA)<sub>2</sub> (10 mol %) used. <sup>h</sup>PdCl<sub>2</sub> (10 mol %) used. <sup>i</sup>Pd<sub>2</sub>(dba)<sub>3</sub> (10 mol %) used. n.d. = not detected. TFE = 2,2,2-trifluoroethanol. TCE = 2,2,2-trichloroethanol. HFIP = 1,1,1,3,3,3-hexafluoroisopropanol. BQ = 1,4-benzoquinone.

**Table S2. Optimization of Reaction Conditions: C-H Alkylation<sup>a</sup>**

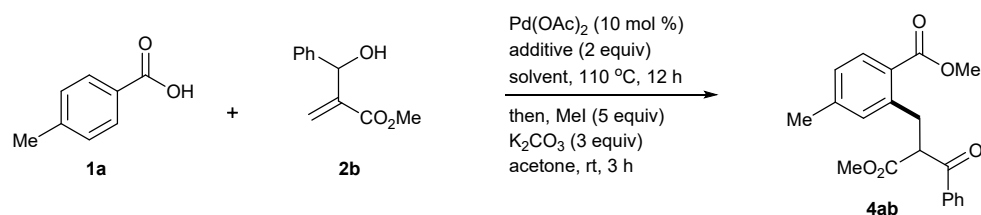

| entry           | additive                            | solvent                           | yield of <b>4ab</b> <sup>b</sup> (%) |
|-----------------|-------------------------------------|-----------------------------------|--------------------------------------|
| 1 <sup>c</sup>  | Ag <sub>2</sub> CO <sub>3</sub>     | HFIP                              | 54                                   |
| 2               | Ag <sub>2</sub> CO <sub>3</sub>     | HFIP                              | 67                                   |
| <b>3</b>        | <b>Ag<sub>2</sub>CO<sub>3</sub></b> | <b>TFE</b>                        | <b>77</b>                            |
| 4               | Ag <sub>2</sub> CO <sub>3</sub>     | TCE                               | 44                                   |
| 5               | Ag <sub>2</sub> CO <sub>3</sub>     | MeOH                              | 27                                   |
| 6               | Ag <sub>2</sub> CO <sub>3</sub>     | EtOH                              | 25                                   |
| 7               | Ag <sub>2</sub> CO <sub>3</sub>     | PhCF <sub>3</sub>                 | n.d.                                 |
| 8               | Ag <sub>2</sub> CO <sub>3</sub>     | (CH <sub>2</sub> Cl) <sub>2</sub> | 30                                   |
| 9               | -                                   | TFE                               | n.d.                                 |
| 10 <sup>d</sup> | Ag <sub>2</sub> CO <sub>3</sub>     | TFE                               | n.d.                                 |
| 11 <sup>e</sup> | Ag <sub>2</sub> CO <sub>3</sub>     | TFE                               | 50                                   |
| 12 <sup>f</sup> | Ag <sub>2</sub> CO <sub>3</sub>     | TFE                               | 41                                   |
| 13 <sup>g</sup> | Ag <sub>2</sub> CO <sub>3</sub>     | TFE                               | n.d.                                 |
| 14 <sup>h</sup> | Ag <sub>2</sub> CO <sub>3</sub>     | TFE                               | n.d.                                 |
| 15 <sup>i</sup> | Ag <sub>2</sub> CO <sub>3</sub>     | TFE                               | n.d.                                 |

<sup>a</sup>Reaction conditions: **1a** (0.1 mmol), **2a** (0.11 mmol), Pd(OAc)<sub>2</sub> (10 mol %), Ag<sub>2</sub>CO<sub>3</sub> (2 equiv), Solvent (1 mL), 110 °C, 12 h, then MeI (5 equiv), K<sub>2</sub>CO<sub>3</sub> (3 equiv), acetone (1.5 mL) rt, 3h. <sup>b</sup>Isolated yield. <sup>c</sup>In presence of BQ (1 equiv). <sup>d</sup>In absence of Pd(OAc)<sub>2</sub>. <sup>e</sup>Ag<sub>2</sub>CO<sub>3</sub> (1 equiv). <sup>f</sup>At 80 °C. <sup>g</sup>Pd(TFA)<sub>2</sub> (10 mol%) used. <sup>h</sup>PdCl<sub>2</sub> (10 mol %) used. <sup>i</sup>Pd<sub>2</sub>(dba)<sub>3</sub> (10 mol %) used. n.d. = not detected. TFE = 2,2,2-trifluoroethanol. TCE = 2,2,2-trichloroethanol. HFIP = 1,1,1,3,3,3-hexafluoroisopropanol. BQ = 1,4-benzoquinone.

Benzoic Acids **1a-r** of Sigma-Aldrich, TCI Chemicals and BLD pharm were utilized for the reactions as received.

### General Procedure for the Preparation of MBH Alcohol **2a**.<sup>1</sup>

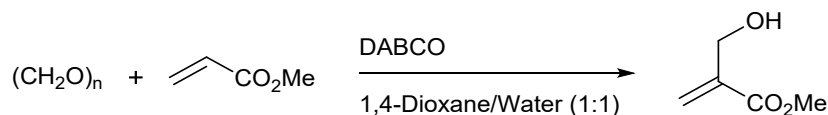

To a solution of paraformaldehyde (20 mmol, 600 mg, 1.0 equiv) in dioxane/water (1:1) (30 mL, 0.6 M), methyl acrylate (60 mmol, 1.72 g, 3.0 equiv) and DABCO (20 mmol, 2.240 g, 1.0 equiv) were added and stirred at room temperature for 12 h. After completion (monitored by TLC), the reaction mixture was diluted with EtOAc (20 mL) and washed successively with saturated solution of NaHCO<sub>3</sub> (2 x 20 mL) and brine (1 x 10 mL). Drying of the organic layer over Na<sub>2</sub>SO<sub>4</sub> and evaporation of the solvent gave a residue that was purified on silica gel column chromatography using n-hexane and EtOAc as an eluent to afford the MBH alcohol **2a**.

### General Procedure for the Preparation of MBH Alcohols **2b-o**.<sup>1</sup>

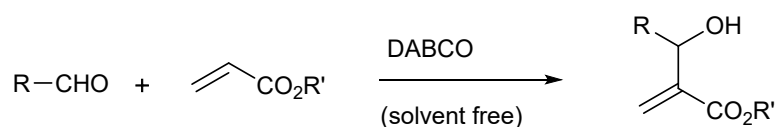

Aldehyde (20 mmol, 1.0 equiv), acrylate (60 mmol, 3.0 equiv) and DABCO (20 mmol, 2.24 g, 1.0 equiv) were stirred at room temperature under solvent free condition for 3 h to 7 days. After completion (monitored by TLC), the reaction mixture was diluted with EtOAc (20 mL) and washed successively with saturated solution of NaHCO<sub>3</sub> (2 x 20 mL) and brine (1 x 10 mL). Drying of the organic layer over Na<sub>2</sub>SO<sub>4</sub> and evaporation of the solvent gave a residue that was purified on silica gel column chromatography using n-hexane and EtOAc as an eluent to afford the MBH alcohol **2b-o**.

### Procedure for the Preparation of Deuterated MBH Alcohol **2b-d<sub>1</sub>**.<sup>2</sup>

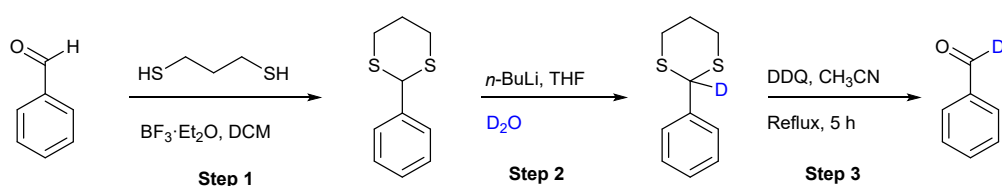

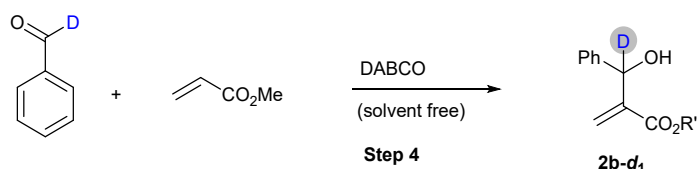

**Step 1:** To a stirred solution of benzaldehyde (6.0 mmol, 636 mg, 1.0 equiv) and propane-1,3-dithiol (6.0 mmol, 649 mg, 1.0 equiv) in CH<sub>2</sub>Cl<sub>2</sub> (20 mL, 0.3 M) were slowly added BF<sub>3</sub>·Et<sub>2</sub>O (3 mmol, 0.37 mL, 0.3 equiv) at 0 °C. The resulting mixture was allowed to warm to room temperature and continued to the stirring for 30 min until the disappearance of benzaldehyde was determined by TLC analysis. The reaction was quenched with H<sub>2</sub>O (20 mL) and extracted with CH<sub>2</sub>Cl<sub>2</sub> (3 x 20 mL). Drying (Na<sub>2</sub>SO<sub>4</sub>) and evaporation of the solvent gave a residue that was purified on silica gel column chromatography using n-hexane and EtOAc as an eluent to afford the corresponding 2-phenyl-1,3-dithiane in 91% (1.1 g) yield.

**Step 2:** To a stirred solution of 2-phenyl-1,3-dithiane (3 mmol, 589 mg, 1 equiv) in THF (15 mL, 0.2 M) was added *n*-BuLi (1.6 M in hexane solution, 6 mmol, 5.5 mL, 2 equiv) at -35 °C under N<sub>2</sub> atmosphere. After stirring for 3 h, D<sub>2</sub>O (34.4 mmol, 0.6 mL, 4 equiv) was added into the reaction mixture. After completion (monitored by TLC), the mixture was diluted with H<sub>2</sub>O (5 mL) and extracted with EtOAc (3 x 15 mL). Drying (Na<sub>2</sub>SO<sub>4</sub>) and evaporation of the solvent gave deuterated 2-phenyl-1,3-dithiane residue, which was used for the next step without further purification.

**Step 3:** To a stirred solution of deuterated 2-phenyl-1,3-dithiane (3 mmol, 592 mg, 1.0 equiv) in CH<sub>3</sub>CN (15 mL, 0.2 M) was added DDQ (3.3 mmol, 749 mg, 1.0 equiv) and the resulting mixture was refluxed at 90 °C for 5 h. After completion, the solvent was evaporated under reduced pressure and the residue was dissolved in CH<sub>2</sub>Cl<sub>2</sub> (10 mL) and passed through a short pad of celite. Evaporation of the solvent gave a residue that was purified on silica gel column chromatography using n-hexane and EtOAc as an eluent to afford the deuterated benzaldehyde in 85% (273 mg) yield.

**Step 4:** The deuterated benzaldehyde (step 3) was reacted with methyl acrylate as described in the general procedure for the preparation of MBH alcohol to produce the deuterated MBH alcohol **2b-d<sub>1</sub>**.

## General Procedure for the Pd-Catalyzed C-H Alkenylation of Benzoic acids with MBH Alcohols.

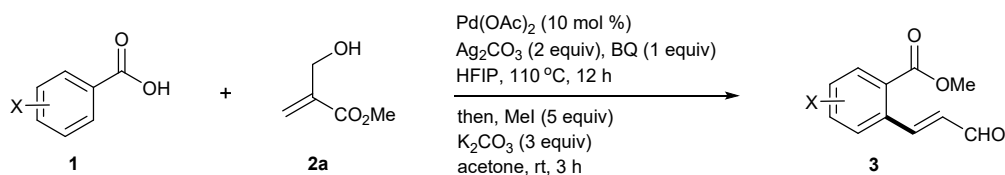

Benzoic acid **1** (0.1 mmol, 1.0 equiv), MBH alcohol **2a** (0.11 mmol, 1.1 equiv), Pd(OAc)<sub>2</sub> (0.01 mmol, 2.3 mg, 0.1 equiv), Ag<sub>2</sub>CO<sub>3</sub> (0.2 mmol, 55 mg, 2.0 equiv) and 1,4-benzoquinone (0.1 mmol, 11 mg, 1.0 equiv) were stirred in 1,1,1,3,3,3-hexafluoroisopropanol (HFIP) (1 mL, 0.1 M) at 110 °C (in a pre-heated oil bath) in a sealed tube for 12 h. The reaction mixture was cooled to room temperature, diluted with EtOAc (5 mL) and passed through a short celite pad. Evaporation of the solvent gave a residue, which was stirred with K<sub>2</sub>CO<sub>3</sub> (0.3 mmol, 41.5 mg, 3.0 equiv) and MeI (0.5 mmol, 31 μL, 5 equiv) in acetone (2 mL, 0.05 M) at room temperature for 3 h. After completion (monitored by TLC), the solvent was evaporated under reduced pressure and resulting residue was mixed with water (10 mL) and extracted with EtOAc (2 x 10 mL). Drying (Na<sub>2</sub>SO<sub>4</sub>) and evaporation of the solvent gave a residue that was purified on silica gel column chromatography using n-hexane and EtOAc as an eluent to afford **3**.

### Scale-up Synthesis of **3ba**.

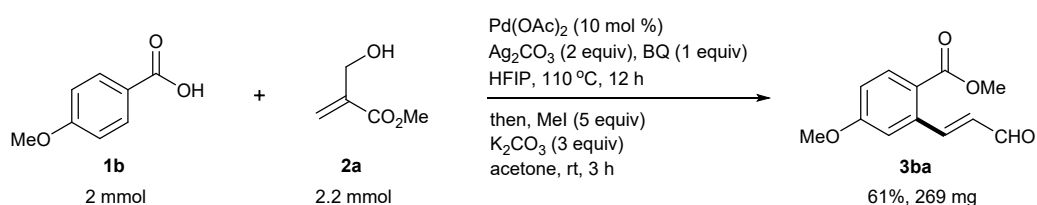

4-Methoxybenzoic acid **1b** (2 mmol, 304 mg, 1.0 equiv), MBH alcohol **2a** (2.2 mmol, 255 mg, 1.1 equiv), Pd(OAc)<sub>2</sub> (0.2 mmol, 45 mg, 0.1 equiv), Ag<sub>2</sub>CO<sub>3</sub> (4 mmol, 1.1 g, 2.0 equiv) and 1,4-benzoquinone (2 mmol, 216 mg, 1.0 equiv) were stirred in 1,1,1,3,3,3-hexafluoroisopropanol (HFIP) (10 mL, 0.2 M) at 110 °C (in a pre-heated oil bath) in a sealed tube for 12 h. The reaction mixture was cooled to room temperature, diluted with EtOAc (20 mL) and passed through a short celite pad. Evaporation of the solvent gave a residue that was stirred with K<sub>2</sub>CO<sub>3</sub> (6 mmol, 828 mg, 3.0 equiv) and MeI (10 mmol, 0.6 mL, 5.0 equiv) in acetone (20 mL, 0.1 M) at room temperature for 3 h. After completion (monitored by TLC), the solvent was evaporated under reduced pressure and resulting residue was mixed with water (30 mL) and extracted with EtOAc (2 x 30 mL). Drying (Na<sub>2</sub>SO<sub>4</sub>) and evaporation of the



solvent gave a residue that was purified on silica gel column chromatography using n-hexane and EtOAc as an eluent to afford **3ba** in 61% (269 mg) yield.

### General Procedure for the Pd-Catalyzed C-H Alkylation of Benzoic acids with MBH Alcohols.

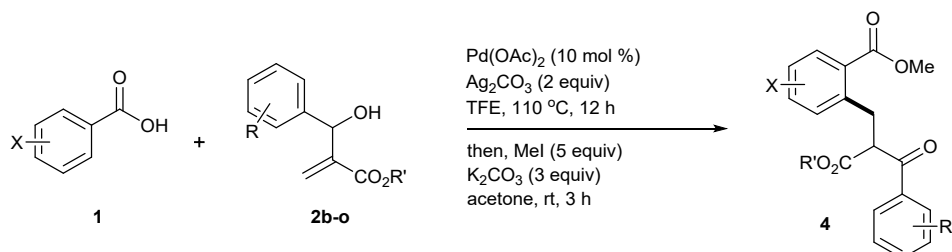

Benzoic acid **1** (0.1 mmol, 1.0 equiv), MBH alcohol **2b-o** (0.11 mmol, 1.1 equiv),  $\text{Pd(OAc)}_2$  (0.01 mmol, 2.3 mg, 0.1 equiv) and  $\text{Ag}_2\text{CO}_3$  (0.2 mmol, 55 mg, 2.0 equiv) were stirred in 2,2,2-trifluoroethanol (TFE) (1 mL, 0.1 M) at 110 °C (in a pre-heated oil bath) in a sealed tube for 12 h. The reaction mixture was cooled to room temperature, diluted with EtOAc (5 mL) and passed through a short pad of celite. Evaporation of the solvent gave a residue that was stirred with  $\text{K}_2\text{CO}_3$  (0.3 mmol, 41.5 mg, 3.0 equiv) and MeI (0.5 mmol, 31  $\mu\text{L}$ , 5.0 equiv) in acetone (2 mL, 0.05 M) at room temperature for 3 h. After completion (monitored by TLC), the solvent was evaporated under reduced pressure and resulting residue was mixed with water (10 mL) and extracted with EtOAc (2 x 10 mL). Drying ( $\text{Na}_2\text{SO}_4$ ) and evaporation of the solvent gave a residue that was purified on silica gel column chromatography using n-hexane and EtOAc as an eluent to afford **4**.

### Scale-up Synthesis of 4bb.

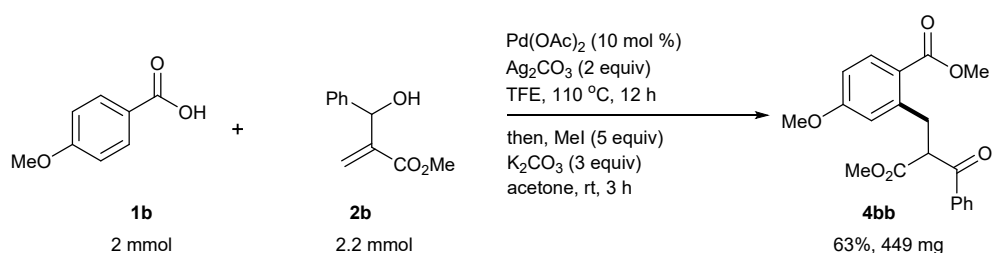

4-Methoxybenzoic acid **1b** (2 mmol, 304 mg, 1.0 equiv), MBH alcohol **2b** (2.2 mmol, 384 mg, 1.1 equiv),  $\text{Pd(OAc)}_2$  (0.2 mmol, 45 mg, 0.1 equiv),  $\text{Ag}_2\text{CO}_3$  (4 mmol, 1.1 g, 2.0 equiv) were stirred in 2,2,2-trifluoroethanol (TFE) (10 mL, 0.2 M) at 110 °C (in a pre-heated oil bath) in a sealed tube for 12 h. The reaction mixture was cooled to room temperature, diluted with EtOAc (20 mL) and passed through a small celite pad. Evaporation of the solvent gave a residue

that was stirred with  $K_2CO_3$  (6 mmol, 828 mg, 3.0 equiv) and MeI (10 mmol, 0.6 mL, 5.0 equiv) in acetone (20 mL, 0.1 M) at room temperature for 3 h. After completion (monitored by TLC), the solvent was evaporated under reduced pressure and resulting residue was mixed with water (30 mL) and extracted with EtOAc (2 x 30 mL). Drying ( $Na_2SO_4$ ) and evaporation of the solvent gave a residue that was purified on silica gel column chromatography using n-hexane and EtOAc as an eluent to afford **4bb** in 63% (449 mg) yield.

### Synthesis of 5.

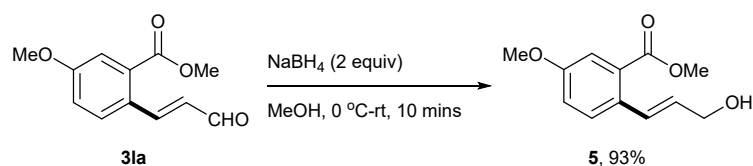

To a stirred solution of **3la** (0.1 mmol, 20.4 mg, 1.0 equiv) in MeOH (2 mL, 0.05 M) was added  $NaBH_4$  (0.2 mmol, 7.6 mg, 2.0 equiv) at 0 °C under  $N_2$  atmosphere. The reaction was allowed to stir for 10 minutes at room temperature. After completion (monitored by TLC), the solvent was evaporated and the residue was purified on silica gel column chromatography using n-hexane and EtOAc as an eluent to afford **5** in 93% (20.7 mg) yield.

### Synthesis of 6.

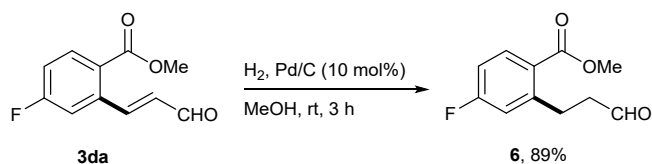

To a stirred solution of **3da** (0.1 mmol, 18.5 mg, 1.0 equiv) in MeOH (2 mL, 0.05 M), Pd/C (10 mol %, 1 mg) was added under hydrogen balloon and allowed to stir for 3 h at room temperature. After completion (monitored by TLC), the reaction mixture was passed through a short celite pad using EtOAc (10 mL). Evaporation of the solvent gave a residue that was purified on silica gel column chromatography to afford **6** in 89% (18.7 mg) yield.

### Synthesis of 7.

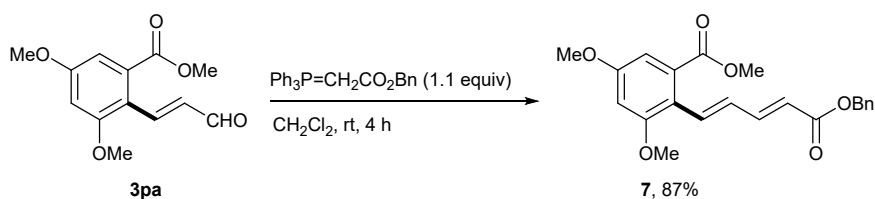

To a stirred solution of **3pa** (0.1 mmol, 25 mg, 1.0 equiv) in CH<sub>2</sub>Cl<sub>2</sub> (1 mL, 0.1 M), Ph<sub>3</sub>P=CH<sub>2</sub>CO<sub>2</sub>Bn (0.11 mmol, 45 mg, 1.1 equiv) was added and the reaction was allowed to stir for 4 h at room temperature. After completion (monitored by TLC), the solvent was evaporated under reduced pressure and the residue was purified on silica gel chromatography using n-hexane and EtOAc as an eluent to afford **7** in 87% (33 mg) yield.

### Synthesis of **8**.

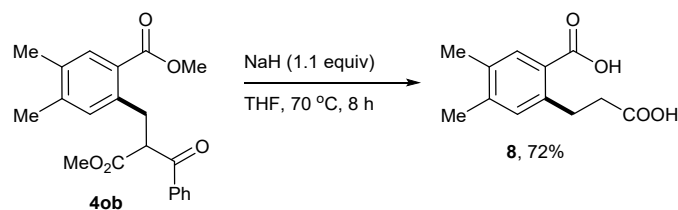

A solution of **4ob** (0.1 mmol, 35.5 mg, 1.0 equiv) and a suspension of NaH (0.11 mmol, 4.5 mg, 60 % dispersion in mineral oil, 1.1 equiv) in THF (2 mL, 0.05 M) was stirred at 70 °C for 12 h. After completion (monitored by TLC), the reaction mixture was quenched with saturated aq. NH<sub>4</sub>Cl (5 mL) and the aqueous layer was extracted using EtOAc (2 x 10 mL). Drying (Na<sub>2</sub>SO<sub>4</sub>) and evaporation of the solvent gave a residue that was purified on silica gel column chromatography using n-hexane and EtOAc as an eluent to afford **8** in 72% (16 mg) yield.

### Synthesis of **9**.

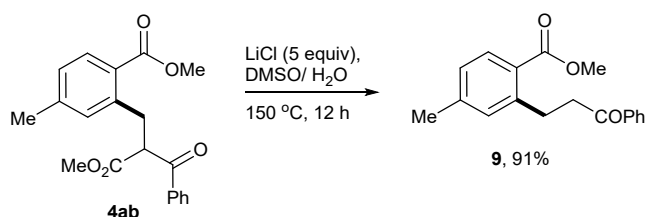

To a stirred solution of **4ab** (0.1 mmol, 34 mg, 1.0 equiv) in DMSO (1 mL, 0.1 M) and H<sub>2</sub>O (0.5 mmol, 10 μL, 5.0 equiv), LiCl (0.5 mmol, 21 mg, 5.0 equiv) was added. The resultant solution was stirred at 150 °C for 12 h under argon atmosphere. After completion (monitored by TLC), the reaction mixture was cooled to room temperature and extracted with EtOAc (2 x 10 mL). The organic layer was washed with brine (1 x 10 mL) and water (1 x 10 mL). Drying (Na<sub>2</sub>SO<sub>4</sub>) and evaporation of the solvent gave a residue that was purified on silica gel column chromatography using n-hexane and EtOAc as an eluent to afford **9** in 91% (25.7 mg) yield.

## Characterization Data of the MBH Alcohols

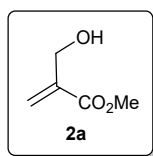

**Methyl 2-(hydroxymethyl)acrylate 2a.**<sup>3</sup> Analytical TLC on silica gel, 1:5 EtOAc/hexane  $R_f = 0.41$ ; colorless liquid; yield 75% (870 mg);  $^1\text{H NMR}$  (400 MHz,  $\text{CDCl}_3$ )  $\delta$  6.25 (s, 1H), 5.83 (s, 1H), 4.31 (s, 2H), 3.77 (s, 3H), 2.50 (bs, 1H).

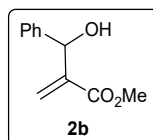

**Methyl 2-(hydroxy(phenyl)methyl)acrylate 2b.**<sup>4</sup> Analytical TLC on silica gel, 1:5 EtOAc/hexane  $R_f = 0.44$ ; colorless liquid; yield 79% (1.52 g);  $^1\text{H NMR}$  (400 MHz,  $\text{CDCl}_3$ )  $\delta$  7.38-7.31 (m, 4H), 7.29-7.26 (m, 1H), 6.33 (s, 1H), 5.84 (s, 1H), 5.55 (s, 1H), 3.71 (s, 3H), 3.14 (bs, 1H).

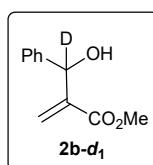

**Methyl 2-(hydroxy(phenyl)methyl-d)acrylate 2b-d<sub>1</sub>.**<sup>5</sup> Analytical TLC on silica gel, 1:5 EtOAc/hexane  $R_f = 0.44$ ; colorless liquid; yield 71% (411 mg);  $^1\text{H NMR}$  (400 MHz,  $\text{CDCl}_3$ )  $\delta$  7.39-7.26 (m, 5H), 6.34 (s, 1H), 5.84 (s, 1H), 3.72 (s, 3H), 3.02 (bs, 1H).

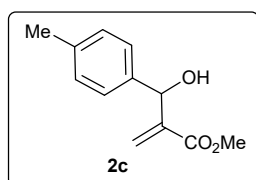

**Methyl 2-(hydroxy(p-tolyl)methyl)acrylate 2c.**<sup>6</sup> Analytical TLC on silica gel, 1:5 EtOAc/hexane  $R_f = 0.50$ ; colorless liquid; yield 79% (1.63 g);  $^1\text{H NMR}$  (400 MHz,  $\text{CDCl}_3$ )  $\delta$  7.24 (d,  $J = 8.0$  Hz, 2H), 7.14 (d,  $J = 8.0$  Hz, 2H), 6.32 (s, 1H), 5.85 (s, 1H), 5.53-5.52 (m, 1H), 3.71 (s, 3H), 2.97 (bs, 1H), 2.33 (s, 3H).

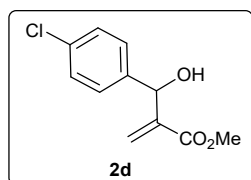

**Methyl 2-((4-chlorophenyl)(hydroxy)methyl)acrylate 2d.**<sup>4</sup> Analytical TLC on silica gel, 1:5 EtOAc/hexane  $R_f = 0.51$ ; colorless liquid; yield 80% (1.81 g);  $^1\text{H NMR}$

(400 MHz, CDCl<sub>3</sub>)  $\delta$  7.30 (s, 4H), 6.33 (s, 1H), 5.83 (s, 1H), 5.52-5.51 (m, 1H), 3.72 (s, 3H), 3.17 (bs, 1H).

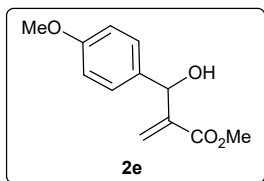

**Methyl 2-(hydroxy(4-methoxyphenyl)methyl)acrylate 2e.**<sup>4</sup> Analytical

TLC on silica gel, 1:5 EtOAc/hexane  $R_f = 0.41$ ; colorless liquid; yield 66% (1.47 g); <sup>1</sup>H NMR (400 MHz, CDCl<sub>3</sub>)  $\delta$  7.27 (d,  $J = 8.5$  Hz, 2H), 6.86 (d,  $J = 8.8$  Hz, 2H), 6.32 (s, 1H), 5.85 (s, 1H), 5.52-5.51 (m, 1H), 3.79 (s, 3H), 3.71 (s, 3H), 2.96-2.95 (m, 1H).

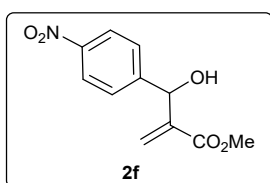

**Methyl 2-(hydroxy(4-nitrophenyl)methyl)acrylate 2f.**<sup>6</sup> Analytical

TLC on silica gel, 1:5 EtOAc/hexane  $R_f = 0.45$ ; yellow liquid; yield 85% (2.0 g); <sup>1</sup>H NMR (400 MHz, CDCl<sub>3</sub>)  $\delta$  8.18 (d,  $J = 8.4$  Hz, 2H), 7.55 (d,  $J = 8.4$  Hz, 2H), 6.39 (s, 1H), 5.87 (s, 1H), 5.63 (s, 1H), 3.73 (s, 3H), 3.40 (bs, 1H).

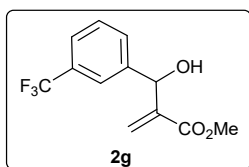

**Methyl 2-(hydroxy(3-(trifluoromethyl)phenyl)methyl)acrylate 2g.**<sup>6</sup>

Analytical TLC on silica gel, 1:5 EtOAc/hexane  $R_f = 0.52$ ; colorless liquid; yield 82% (2.15 g); <sup>1</sup>H NMR (400 MHz, CDCl<sub>3</sub>)  $\delta$  7.66 (s, 1H), 7.56 (t,  $J = 8.0$  Hz, 2H), 7.47 (t,  $J = 7.6$  Hz, 1H), 6.38 (s, 1H), 5.84 (s, 1H), 5.62-5.60 (m, 1H), 3.74 (s, 3H), 3.19 (d,  $J = 6.0$  Hz, 1H).

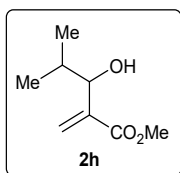

**Methyl 3-hydroxy-4-methyl-2-methylenepentanoate 2h.**<sup>7</sup> Analytical TLC

on silica gel, 1:5 EtOAc/hexane  $R_f = 0.50$ ; colorless liquid; yield 68% (1.1 g); <sup>1</sup>H NMR (400 MHz, CDCl<sub>3</sub>)  $\delta$  6.18 (d,  $J = 6.9$  Hz, 1H), 5.72 (s, 1H), 4.04 (d,  $J = 6.6$  Hz, 1H), 3.71 (s, 3H), 2.74 (bs, 1H), 1.88-1.81 (m, 1H), 0.88-0.82 (m, 6H).

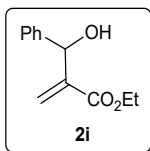

**Ethyl 2-(hydroxy(phenyl)methyl)acrylate 2i.**<sup>8</sup> Analytical TLC on silica gel,

1:5 EtOAc/hexane  $R_f = 0.44$ ; colorless liquid; yield 82% (1.7 g); <sup>1</sup>H NMR (600 MHz, CDCl<sub>3</sub>)  $\delta$  7.37-7.32 (m, 4H), 7.29-7.26 (m, 1H), 6.33 (s, 1H), 5.82 (s, 1H), 5.55-5.54 (m, 1H), 4.16 (q,  $J = 7.2$  Hz, 2H), 3.17 (bs, 1H), 1.23 (t,  $J = 7.2$  Hz, 3H).

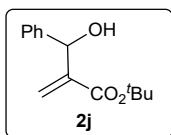

**tert-Butyl 2-(hydroxy(phenyl)methyl)acrylate 2j.**<sup>9</sup> Analytical TLC on silica

gel, 1:5 EtOAc/hexane  $R_f = 0.51$ ; colorless liquid; yield 70% (1.64 g); <sup>1</sup>H NMR (400 MHz, CDCl<sub>3</sub>)  $\delta$  7.38-7.32 (m, 4H), 7.29-7.25 (m, 1H), 6.25 (s, 1H), 5.72 (s, 1H), 5.49 (d,  $J = 5.6$  Hz, 1H), 3.12 (d,  $J = 6.0$  Hz, 1H), 1.39 (s, 9H).

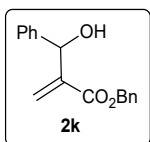

**Benzyl 2-(hydroxy(phenyl)methyl)acrylate 2k.**<sup>9</sup> Analytical TLC on silica gel,

1:5 EtOAc/hexane  $R_f = 0.44$ ; colorless liquid; yield 81% (2.17 g); <sup>1</sup>H NMR (400 MHz, CDCl<sub>3</sub>)  $\delta$  7.35-7.20 (m, 10H), 6.37 (s, 1H), 5.86 (s, 1H), 5.54 (s, 1H), 5.14-5.07 (m, 2H), 3.13 (bs, 1H).

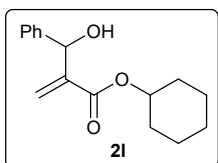

**Cyclohexyl 2-(hydroxy(phenyl)methyl)acrylate 2l.**<sup>10</sup> Analytical TLC on

silica gel, 1:5 EtOAc/hexane  $R_f = 0.44$ ; colorless liquid; yield 71% (1.85 g); <sup>1</sup>H NMR (400 MHz, CDCl<sub>3</sub>)  $\delta$  7.38-7.31 (m, 4H), 7.29-7.25 (m, 1H), 6.34 (s, 1H), 5.80 (s, 1H), 5.54 (s, 1H), 4.81-4.76 (m, 1H), 3.16 (bs, 1H), 1.79-1.52 (m, 5H), 1.50-1.23 (m, 6H).

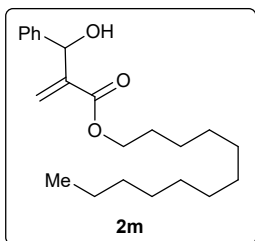

**Dodecyl 2-(hydroxy(phenyl)methyl)acrylate 2m.** Analytical TLC on

silica gel, 1:10 EtOAc/hexane  $R_f = 0.47$ ; colorless liquid; yield 81% (281 mg); <sup>1</sup>H NMR (600 MHz, CDCl<sub>3</sub>)  $\delta$  7.36 (d,  $J = 7.2$  Hz, 2H), 7.34 (t,  $J = 7.2$  Hz, 2H), 7.29-7.26 (m, 1H), 6.34 (s,

1H), 5.82 (s, 1H), 5.55 (s, 1H), 4.13-4.06 (m, 2H), 3.11 (bs, 1H), 1.60-1.58 (m, 2H), 1.31-1.26 (m, 18H), 0.88 (t,  $J = 7.2$  Hz, 3H);  $^{13}\text{C}$  NMR (150 MHz,  $\text{CDCl}_3$ )  $\delta$  166.5, 142.3, 141.5, 128.5, 127.9, 126.7, 126.0, 73.5, 65.2, 32.0, 29.8, 29.7, 29.68, 29.60, 29.5, 29.3, 28.6, 26.0, 22.8, 14.2; FT-IR (neat) 3447, 2923, 2854, 1711, 1630, 1456, 1269, 1149, 1040, 955  $\text{cm}^{-1}$ ; HRMS (ESI-TOF)  $m/z$ :  $[\text{M}+\text{Na}]^+$  calcd for  $\text{C}_{22}\text{H}_{34}\text{O}_3\text{Na}$  369.2400; Found 369.2399.

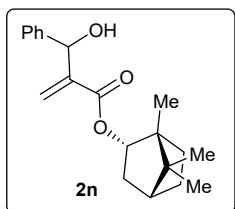

**(1R,2S,4R)-1,7,7-Trimethylbicyclo[2.2.1]heptan-2-yl 2-(hydroxy-**

**(phenyl)methyl)acrylate 2n.** Analytical TLC on silica gel, 1:10 EtOAc/hexane  $R_f = 0.41$ ; colorless liquid; yield 79% (248 mg); 1:1 mixture of diastereomers;  $^1\text{H}$  NMR (400 MHz,  $\text{CDCl}_3$ )  $\delta$  7.38-7.31 (m, 8H), 7.29-7.25 (m, 2H), 6.38 (s, 2H), 5.85 (t,  $J = 1.6$  Hz, 1H), 5.84 (t,  $J = 1.2$  Hz, 1H), 5.56-5.54 (m, 2H), 4.91-4.86 (m, 2H), 3.11 (d,  $J = 5.6$  Hz, 1H), 3.05 (d,  $J = 5.6$  Hz, 1H), 2.36-2.24 (m, 2H), 1.84-1.61 (m, 7H), 1.32-1.23 (m, 2H), 1.18-1.05 (m, 2H), 0.93-0.88 (m, 1H), 0.87-0.84 (m, 12H), 0.77 (s, 3H), 0.70 (s, 3H);  $^{13}\text{C}$  NMR (100 MHz,  $\text{CDCl}_3$ )  $\delta$  166.7, 166.6, 142.5, 142.4, 141.5, 128.6, 128.5, 128.0, 127.9, 126.8, 126.7, 126.0, 125.7, 80.9, 80.8, 73.5, 73.4, 48.9, 47.9, 44.9, 36.7, 36.6, 28.0, 27.9, 27.4, 27.3, 19.7, 18.9, 13.5, 13.4; FT-IR (neat) 3450, 2953, 2879, 1705, 1630, 1453, 1267, 1152, 1022, 955  $\text{cm}^{-1}$ ; HRMS (ESI-TOF)  $m/z$ :  $[\text{M}+\text{Na}]^+$  calcd for  $\text{C}_{20}\text{H}_{26}\text{O}_3\text{Na}$  337.1774; Found 337.1772.

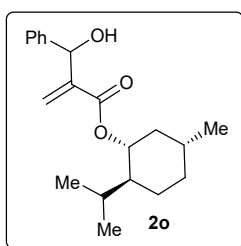

**(1R,2S,5R)-2-Isopropyl-5-methylcyclohexyl 2-(hydroxy(phenyl)-**

**methyl)acrylate 2o.**<sup>11</sup> Analytical TLC on silica gel, 1:10 EtOAc/hexane  $R_f = 0.40$ ; colorless solid; yield 74% (268 mg); 1.11:1 mixture of diastereomers;  $^1\text{H}$  NMR (600 MHz,  $\text{CDCl}_3$ )  $\delta$  7.40-7.35 (m, 7.6H, major + minor), 7.31-7.28 (m, 1.9H, major + minor), 6.36 (s, 1H, major), 6.34 (s, 0.9H, minor), 5.85 (s, 1H, major), 5.80 (s, 0.9H, minor), 5.57-5.56 (m, 1.9H, major + minor), 4.76-4.71 (m, 1.9H, major + minor), 3.11 (d,  $J = 6.6$  Hz, 0.9H, minor), 3.08 (d,  $J = 6.6$  Hz, 1H, major), 1.96-1.90 (m, 1.9H, major + minor), 1.69-1.65 (m, 4.9H, major + minor), 1.51-1.46 (m, 2.7H, minor), 1.38-1.32 (m, 1.9H, major + minor), 1.08-1.02 (m, 1.9H, major + minor), 1.00-0.94 (m, 1.9H, major + minor), 0.91-0.88 (m, 5.8H, major + minor), 0.83 (d,  $J =$

7.2 Hz, 2.7H, minor), 0.78 (d,  $J = 7.2$  Hz, 3H, major), 0.68 (d,  $J = 6.6$  Hz, 2.7H, minor), 0.63 (d,  $J = 6.6$  Hz, 3H, major).

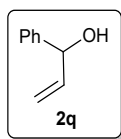

**1-Phenylprop-2-en-1-ol 2q.**<sup>12</sup> Analytical TLC on silica gel, 1:10 EtOAc/hexane  $R_f = 0.35$ ; colorless solid; yield 82% (154 mg);  $^1\text{H NMR}$  (400 MHz,  $\text{CDCl}_3$ )  $\delta$  7.36-7.24 (m, 5H), 6.08-6.00 (m, 1H), 5.36-5.32 (m, 1H), 5.20-5.17 (m, 2H), 2.12 (bs, 1H).

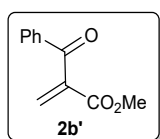

**Methyl 2-benzoylacrylate 2b'.**<sup>13</sup> Analytical TLC on silica gel, 1:10 EtOAc/hexane  $R_f = 0.42$ ; colorless solid; yield 77% (231 mg);  $^1\text{H NMR}$  (400 MHz,  $\text{CDCl}_3$ )  $\delta$  7.85 (d,  $J = 8.4$  Hz, 2H), 7.60 (t,  $J = 7.4$  Hz, 1H), 7.47 (t,  $J = 7.7$  Hz, 2H), 6.72 (s, 1H), 6.05 (s, 1H), 3.76 (s, 3H).

### Characterization Data of the Products

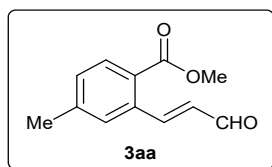

**Methyl (E)-4-methyl-2-(3-oxoprop-1-en-1-yl)benzoate 3aa.** Analytical TLC on silica gel, 1:9 EtOAc/hexane  $R_f = 0.50$ ; colorless solid; mp 77-78 °C; yield 72% (15 mg);  $^1\text{H NMR}$  (400 MHz,  $\text{CDCl}_3$ )  $\delta$  9.75 (d,  $J = 8.0$  Hz, 1H), 8.44 (d,  $J = 16.0$  Hz, 1H), 7.93 (d,  $J = 8.0$  Hz, 1H), 7.44 (s, 1H), 7.29 (d,  $J = 8.0$  Hz, 1H), 6.60 (dd,  $J = 16.0, 8.0$  Hz, 1H), 3.93 (s, 3H), 2.44 (s, 3H);  $^{13}\text{C NMR}$  (100 MHz,  $\text{CDCl}_3$ )  $\delta$  194.3, 167.2, 152.0, 143.5, 136.2, 131.4, 131.2, 131.1, 128.8, 126.8, 52.4, 21.7; FT-IR (neat) 2924, 1712, 1678, 1604, 1438, 1267, 1207, 1121, 1081  $\text{cm}^{-1}$ ; HRMS (ESI-TOF)  $m/z$ :  $[\text{M}+\text{H}]^+$  calcd for  $\text{C}_{12}\text{H}_{13}\text{O}_3$  205.0859; Found 205.0859.

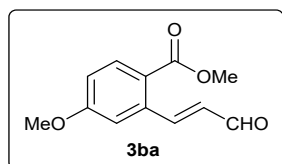

**Methyl (E)-4-methoxy-2-(3-oxoprop-1-en-1-yl)benzoate 3ba.** Analytical TLC on silica gel, 1:9 EtOAc/hexane  $R_f = 0.34$ ; colorless solid; mp 82-83 °C; yield 73% (16 mg);  $^1\text{H NMR}$  (600 MHz,  $\text{CDCl}_3$ )  $\delta$  9.77 (d,  $J = 7.8$  Hz, 1H), 8.50 (d,  $J = 16.2$  Hz, 1H), 8.02 (d,  $J = 9.0$  Hz, 1H), 7.08 (d,  $J = 2.4$  Hz, 1H), 6.98 (dd,  $J = 8.4, 2.4$  Hz, 1H), 6.58 (dd,



$J = 16.2, 7.8$  Hz, 1H), 3.91 (s, 3H), 3.89 (s, 3H);  $^{13}\text{C}$  NMR (150 MHz,  $\text{CDCl}_3$ )  $\delta$  194.3, 166.8, 162.8, 152.1, 138.5, 133.5, 131.3, 121.7, 115.6, 113.2, 55.8, 52.3; FT-IR (neat) 2925, 1704, 1678, 1594, 1440, 1332, 1238, 1123, 1031  $\text{cm}^{-1}$ ; HRMS (ESI-TOF)  $m/z$ :  $[\text{M}+\text{H}]^+$  calcd for  $\text{C}_{12}\text{H}_{13}\text{O}_4$  221.0808; Found 221.0808.

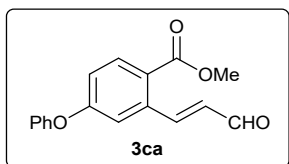

**Methyl (E)-2-(3-oxoprop-1-en-1-yl)-4-phenoxybenzoate 3ca.**

Analytical TLC on silica gel, 1:9 EtOAc/hexane  $R_f = 0.41$ ; brown sticky liquid; yield 65% (18 mg);  $^1\text{H}$  NMR (600 MHz,  $\text{CDCl}_3$ )  $\delta$  9.74 (d,  $J = 7.8$  Hz, 1H), 8.46 (d,  $J = 16.2$  Hz, 1H), 8.02 (d,  $J = 9.0$  Hz, 1H), 7.42 (t,  $J = 7.8$  Hz, 2H), 7.24 (t,  $J = 7.2$  Hz, 1H), 7.16-7.15 (m, 1H), 7.07 (d,  $J = 7.8$  Hz, 2H), 7.04-7.03 (m, 1H), 6.47 (dd,  $J = 15.6, 7.8$  Hz, 1H), 3.92 (s, 3H);  $^{13}\text{C}$  NMR (100 MHz,  $\text{CDCl}_3$ )  $\delta$  194.1, 166.6, 161.5, 155.1, 151.3, 138.6, 133.6, 131.6, 130.4, 125.2, 123.4, 120.4, 118.9, 116.4, 52.5; FT-IR (neat) 2925, 2878, 1709, 1678, 1594, 1445, 1332, 1238, 1123, 1033  $\text{cm}^{-1}$ ; HRMS (ESI-TOF)  $m/z$ :  $[\text{M}+\text{H}]^+$  calcd for  $\text{C}_{17}\text{H}_{15}\text{O}_4$  283.0965; Found 283.0964.

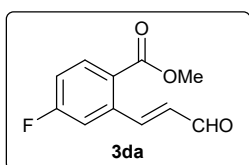

**Methyl (E)-4-fluoro-2-(3-oxoprop-1-en-1-yl)benzoate 3da.**

Analytical TLC on silica gel, 1:9 EtOAc/hexane  $R_f = 0.53$ ; colorless solid; mp 94-95  $^\circ\text{C}$ ; yield 74% (15 mg);  $^1\text{H}$  NMR (400 MHz,  $\text{CDCl}_3$ )  $\delta$  9.77 (d,  $J = 7.6$  Hz, 1H), 8.47-8.42 (m, 1H), 8.08 (dd,  $J = 8.8, 5.6$  Hz, 1H), 7.32 (dd,  $J = 9.6, 2.8$  Hz, 1H), 7.20-7.15 (m, 1H), 6.58 (dd,  $J = 15.6, 7.6$  Hz, 1H), 3.94 (s, 3H);  $^{13}\text{C}$  NMR (100 MHz,  $\text{CDCl}_3$ )  $\delta$  193.8, 166.3, 166.2 ( $J_{\text{C-F}} = 249.0$  Hz), 150.2, 139.2 ( $J_{\text{C-F}} = 8.5$  Hz), 134.0 ( $J_{\text{C-F}} = 9.2$  Hz), 132.0, 125.7 ( $J_{\text{C-F}} = 3.2$  Hz), 117.4 ( $J_{\text{C-F}} = 21.4$  Hz), 115.1 ( $J_{\text{C-F}} = 22.9$  Hz), 52.7;  $^{19}\text{F}$  NMR (565 MHz,  $\text{CDCl}_3$ )  $\delta$  -105.18; FT-IR (neat) 2920, 1716, 1686, 1559, 1439, 1274, 1238, 1124, 1033  $\text{cm}^{-1}$ ; HRMS (ESI-TOF)  $m/z$ :  $[\text{M}+\text{H}]^+$  calcd for  $\text{C}_{11}\text{H}_{10}\text{O}_3\text{F}$  209.0608; Found 209.0595.

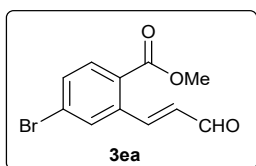

**Methyl (E)-4-bromo-2-(3-oxoprop-1-en-1-yl)benzoate 3ea.**

Analytical TLC on silica gel, 1:9 EtOAc/hexane  $R_f = 0.48$ ; yellow solid; mp 127-128  $^\circ\text{C}$ ; yield 51% (14

mg);  $^1\text{H}$  NMR (400 MHz,  $\text{CDCl}_3$ )  $\delta$  9.76 (d,  $J = 7.6$  Hz, 1H), 8.36 (d,  $J = 16.0$  Hz, 1H), 7.90 (d,  $J = 8.4$  Hz, 1H), 7.77 (d,  $J = 2.0$  Hz, 1H), 7.63 (dd,  $J = 8.4, 1.6$  Hz, 1H), 6.59 (dd,  $J = 16.0, 7.6$  Hz, 1H), 3.94 (s, 3H);  $^{13}\text{C}$  NMR (100 MHz,  $\text{CDCl}_3$ )  $\delta$  193.7, 166.5, 149.9, 138.1, 133.3, 132.7, 132.1, 131.1, 128.2, 127.7, 52.8; FT-IR (neat) 2922, 1714, 1686, 1557, 1438, 1274, 1238, 1123, 1030  $\text{cm}^{-1}$ ; HRMS (ESI-TOF)  $m/z$ :  $[\text{M}+\text{H}]^+$  calcd for  $\text{C}_{11}\text{H}_{10}\text{O}_3\text{Br}$  268.9808; Found 268.9804.

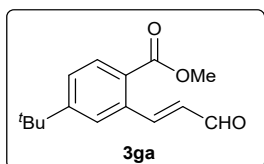

**Methyl (E)-4-(tert-butyl)-2-(3-oxoprop-1-en-1-yl)benzoate 3ga.**

Analytical TLC on silica gel, 1:9 EtOAc/hexane  $R_f = 0.55$ ; yellow sticky liquid; yield 45% (11 mg);  $^1\text{H}$  NMR (400 MHz,  $\text{CDCl}_3$ )  $\delta$  9.77 (d,  $J = 7.6$  Hz, 1H), 8.47 (d,  $J = 16.0$  Hz, 1H), 7.96 (d,  $J = 8.4$  Hz, 1H), 7.64-7.63 (m, 1H), 7.52 (dd,  $J = 8.4, 2.0$  Hz, 1H), 6.63 (dd,  $J = 15.6, 7.6$  Hz, 1H), 3.93 (s, 3H), 1.36 (s, 9H);  $^{13}\text{C}$  NMR (100 MHz,  $\text{CDCl}_3$ )  $\delta$  194.4, 167.2, 156.5, 152.5, 136.0, 131.2, 131.1, 127.6, 126.8, 125.1, 52.5, 35.3, 31.1; FT-IR (neat) 2934, 1716, 1677, 1605, 1438, 1265, 1207, 1121, 1079  $\text{cm}^{-1}$ ; HRMS (ESI-TOF)  $m/z$ :  $[\text{M}+\text{H}]^+$  calcd for  $\text{C}_{15}\text{H}_{19}\text{O}_3$  247.1329; Found 247.1329.

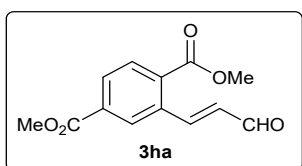

**Dimethyl (E)-2-(3-oxoprop-1-en-1-yl)terephthalate 3ha.**

Analytical TLC on silica gel, 1:9 EtOAc/hexane  $R_f = 0.44$ ; yellow solid; mp 114-115  $^{\circ}\text{C}$ ; yield 75% (18.6 mg);  $^1\text{H}$  NMR (400 MHz,  $\text{CDCl}_3$ )  $\delta$  9.78 (d,  $J = 7.6$  Hz, 1H), 8.36 (d,  $J = 16.0$  Hz, 1H), 8.31-8.30 (m, 1H), 8.14-8.11 (m, 1H), 8.08-8.06 (m, 1H), 6.70 (dd,  $J = 15.6, 7.6$  Hz, 1H), 3.97 (s, 3H), 3.96 (s, 3H);  $^{13}\text{C}$  NMR (100 MHz,  $\text{CDCl}_3$ )  $\delta$  193.8, 166.5, 165.6, 150.1, 136.2, 133.9, 133.1, 132.1, 131.3, 130.9, 129.2, 52.9, 52.8; FT-IR (neat) 2922, 1715, 1711, 1675, 1594, 1439, 1333, 1238, 1123, 1029  $\text{cm}^{-1}$ ; HRMS (ESI-TOF)  $m/z$ :  $[\text{M}+\text{H}]^+$  calcd for  $\text{C}_{13}\text{H}_{13}\text{O}_5$  249.0757; Found 249.0767.

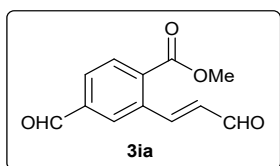

**Methyl (E)-4-formyl-2-(3-oxoprop-1-en-1-yl)benzoate 3ia.**

Analytical TLC on silica gel, 1:9 EtOAc/hexane  $R_f = 0.43$ ; yellow solid; mp 79-80  $^{\circ}\text{C}$ ; yield

64% (14 mg);  $^1\text{H}$  NMR (400 MHz,  $\text{CDCl}_3$ )  $\delta$  10.12 (s, 1H), 9.80 (d,  $J = 7.6$  Hz, 1H), 8.37 (d,  $J = 16.0$  Hz, 1H), 8.17 (d,  $J = 8.0$  Hz, 1H), 8.13-8.12 (m, 1H), 7.99 (dd,  $J = 8.0, 1.6$  Hz, 1H), 6.71 (dd,  $J = 16.0, 7.6$  Hz, 1H), 3.99 (s, 3H);  $^{13}\text{C}$  NMR (100 MHz,  $\text{CDCl}_3$ )  $\delta$  193.6, 190.9, 166.3, 149.7, 138.9, 137.0, 134.2, 132.4, 132.0, 130.5, 129.2, 53.1; FT-IR (neat) 2953, 1725, 1670, 1600, 1460, 1332, 1210, 1159, 1056  $\text{cm}^{-1}$ ; HRMS (ESI-TOF)  $m/z$ :  $[\text{M}+\text{H}]^+$  calcd for  $\text{C}_{12}\text{H}_{11}\text{O}_4$  219.0652; Found 219.0639.

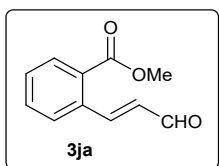

**Methyl (*E*)-2-(3-oxoprop-1-en-1-yl)benzoate 3ja.** Analytical TLC on silica

gel, 1:9 EtOAc/hexane  $R_f = 0.43$ ; yellow liquid; yield 66% (25 mg);  $^1\text{H}$  NMR (500 MHz,  $\text{CDCl}_3$ )  $\delta$  9.76 (d,  $J = 7.8$  Hz, 1H), 8.43 (d,  $J = 15.9$  Hz, 1H), 8.02 (d,  $J = 7.8$  Hz, 1H), 7.65 (d,  $J = 7.8$  Hz, 1H), 7.59 (t,  $J = 7.6$  Hz, 1H), 7.50 (t,  $J = 7.6$  Hz, 1H), 6.62 (dd,  $J = 15.9, 7.8$  Hz, 1H), 3.95 (s, 3H);  $^{13}\text{C}$  NMR (125 MHz,  $\text{CDCl}_3$ )  $\delta$  194.2, 167.2, 151.6, 136.1, 132.8, 131.3, 131.2, 130.4, 129.7, 128.1, 52.6; FT-IR (neat) 2955, 1723, 1674, 1460, 1332, 1210, 1159  $\text{cm}^{-1}$ ; HRMS (ESI-TOF)  $m/z$ :  $[\text{M}+\text{H}]^+$  calcd for  $\text{C}_{11}\text{H}_{11}\text{O}_3$  191.0703; Found 191.0703.

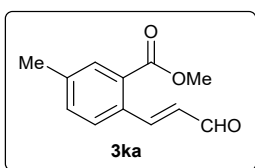

**Methyl (*E*)-5-methyl-2-(3-oxoprop-1-en-1-yl)benzoate 3ka.** Analytical

TLC on silica gel, 1:9 EtOAc/hexane  $R_f = 0.50$ ; colorless solid; mp 69-70  $^{\circ}\text{C}$ ; yield 70% (14 mg);  $^1\text{H}$  NMR (400 MHz,  $\text{CDCl}_3$ )  $\delta$  9.74 (d,  $J = 8.0$  Hz, 1H), 8.38 (d,  $J = 16.0$  Hz, 1H), 7.83 (s, 1H), 7.56 (d,  $J = 8.0$  Hz, 1H), 7.37 (d,  $J = 9.6$  Hz, 1H), 6.61 (dd,  $J = 16.0, 7.6$  Hz, 1H), 3.94 (s, 3H), 2.43 (s, 3H);  $^{13}\text{C}$  NMR (100 MHz,  $\text{CDCl}_3$ )  $\delta$  194.3, 167.4, 151.6, 141.1, 133.5, 133.1, 131.8, 130.6, 129.7, 128.0, 52.6, 21.4; FT-IR (neat) 2925, 1712, 1678, 1606, 1438, 1267, 1208, 1121, 1079  $\text{cm}^{-1}$ ; HRMS (ESI-TOF)  $m/z$ :  $[\text{M}+\text{H}]^+$  calcd for  $\text{C}_{12}\text{H}_{13}\text{O}_3$  205.0859; Found 205.0866.

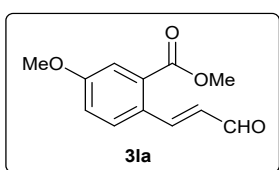

**Methyl (*E*)-5-methoxy-2-(3-oxoprop-1-en-1-yl)benzoate 3la.**

Analytical TLC on silica gel, 1:9 EtOAc/hexane  $R_f = 0.44$ ; colorless solid; mp 74-76  $^{\circ}\text{C}$ ; yield 75% (16.5 mg);  $^1\text{H}$  NMR (400 MHz,  $\text{CDCl}_3$ )  $\delta$  9.70 (d,  $J = 8.0$  Hz, 1H), 8.34 (d,  $J = 15.6$  Hz,

1H), 7.63 (d,  $J = 8.8$  Hz, 1H), 7.49 (d,  $J = 2.8$  Hz, 1H), 7.10 (dd,  $J = 8.8, 2.8$  Hz, 1H), 6.57 (dd,  $J = 15.6, 7.6$  Hz, 1H), 3.95 (s, 3H), 3.88 (s, 3H);  $^{13}\text{C}$  NMR (125 MHz,  $\text{CDCl}_3$ )  $\delta$  194.3, 167.0, 161.2, 151.0, 131.4, 129.5, 128.0, 118.7, 116.0, 55.8, 52.7; FT-IR (neat) 2955, 1720, 1677, 1599, 1496, 1273, 1231, 1122, 1071  $\text{cm}^{-1}$ ; HRMS (ESI-TOF)  $m/z$ :  $[\text{M}+\text{H}]^+$  calcd for  $\text{C}_{12}\text{H}_{13}\text{O}_4$  221.0808; Found 221.0808.

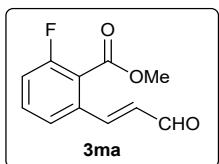

**Methyl (*E*)-2-fluoro-6-(3-oxoprop-1-en-1-yl)benzoate 3ma.**

Analytical TLC on silica gel, 1:9 EtOAc/hexane  $R_f = 0.54$ ; colorless solid; mp 87-88  $^\circ\text{C}$ ; yield 56% (11.6 mg);  $^1\text{H}$  NMR (500 MHz,  $\text{CDCl}_3$ )  $\delta$  9.71 (d,  $J = 8.0$  Hz, 1H), 7.70 (d,  $J = 16.0$  Hz, 1H), 7.52-7.47 (m, 2H), 7.21 (t,  $J = 9.0$  Hz, 1H), 6.67 (dd,  $J = 16.0, 8.0$  Hz, 1H), 4.00 (s, 3H);  $^{13}\text{C}$  NMR (125 MHz,  $\text{CDCl}_3$ )  $\delta$  193.4, 165.2, 161.6 ( $J_{\text{C-F}} = 250.0$  Hz), 148.2 ( $J_{\text{C-F}} = 3.0$  Hz), 135.3 ( $J_{\text{C-F}} = 2.9$  Hz), 132.4 ( $J_{\text{C-F}} = 8.8$  Hz), 132.0, 123.0 ( $J_{\text{C-F}} = 3.4$  Hz), 121.6 ( $J_{\text{C-F}} = 16.1$  Hz), 118.4 ( $J_{\text{C-F}} = 22.2$  Hz), 53.2;  $^{19}\text{F}$  NMR (470 MHz,  $\text{CDCl}_3$ )  $\delta$  -111.71; FT-IR (neat) 2922, 1715, 1685, 1557, 1438, 1274, 1238, 1123, 1031  $\text{cm}^{-1}$ ; HRMS (ESI-TOF)  $m/z$ :  $[\text{M}+\text{H}]^+$  calcd for  $\text{C}_{11}\text{H}_{10}\text{O}_3\text{F}$  209.0608; Found 209.0606.

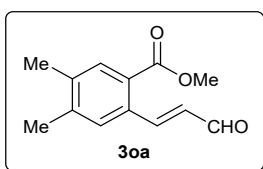

**Methyl (*E*)-4,5-dimethyl-2-(3-oxoprop-1-en-1-yl)benzoate 3oa.**

Analytical TLC on silica gel, 1:9 EtOAc/hexane  $R_f = 0.45$ ; yellow solid; mp 94-95  $^\circ\text{C}$ ; yield 72% (16 mg);  $^1\text{H}$  NMR (400 MHz,  $\text{CDCl}_3$ )  $\delta$  9.73 (d,  $J = 8.0$  Hz, 1H), 8.41 (d,  $J = 16.0$  Hz, 1H), 7.80 (s, 1H), 7.43 (s, 1H), 6.60 (dd,  $J = 15.6, 7.6$  Hz, 1H), 3.92 (s, 3H), 2.34-2.33 (m, 6H);  $^{13}\text{C}$  NMR (100 MHz,  $\text{CDCl}_3$ )  $\delta$  194.4, 167.4, 151.9, 142.1, 139.8, 133.5, 132.4, 130.4, 129.2, 127.2, 52.4, 20.1, 19.8; FT-IR (neat) 2926, 1715, 1676, 1604, 1438, 1267, 1207, 1120, 1080  $\text{cm}^{-1}$ ; HRMS (ESI-TOF)  $m/z$ :  $[\text{M}+\text{H}]^+$  calcd for  $\text{C}_{13}\text{H}_{15}\text{O}_3$  219.1016; Found 219.1014.

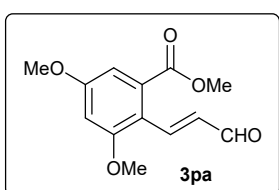

**Methyl (*E*)-3,5-dimethoxy-2-(3-oxoprop-1-en-1-yl)benzoate 3pa.**

Analytical TLC on silica gel, 1:9 EtOAc/hexane  $R_f = 0.31$ ; yellow solid; mp 104-105  $^\circ\text{C}$ ; yield

74% (18.5 mg);  $^1\text{H NMR}$  (400 MHz,  $\text{CDCl}_3$ )  $\delta$  9.62 (d,  $J = 8.0$  Hz, 1H), 7.90 (d,  $J = 16.0$  Hz, 1H), 6.96-6.87 (m, 2H), 6.63 (d,  $J = 2.4$  Hz, 1H), 3.93 (s, 3H), 3.89 (s, 3H), 3.88 (s, 3H);  $^{13}\text{C NMR}$  (125 MHz,  $\text{CDCl}_3$ )  $\delta$  196.1, 168.0, 161.9, 160.8, 147.2, 134.7, 132.4, 116.1, 106.8, 101.7, 56.0, 55.8, 52.9; FT-IR (KBr) 2953, 1722, 1672, 1597, 1460, 1330, 1209, 1159, 1057  $\text{cm}^{-1}$ ; HRMS (ESI-TOF)  $m/z$ :  $[\text{M}+\text{H}]^+$  calcd for  $\text{C}_{13}\text{H}_{15}\text{O}_5$  251.0914; Found 251.0913.

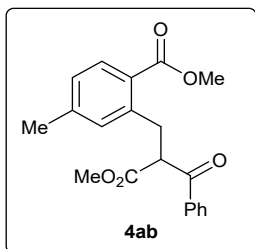

**Methyl 2-(2-benzoyl-3-methoxy-3-oxopropyl)-4-methylbenzoate 4ab.**

Analytical TLC on silica gel, 1:9 EtOAc/hexane  $R_f = 0.37$ ; colorless liquid; yield 77% (26 mg);  $^1\text{H NMR}$  (400 MHz,  $\text{CDCl}_3$ )  $\delta$  7.91 (d,  $J = 7.2$  Hz, 2H), 7.82 (d,  $J = 8.4$  Hz, 1H), 7.53 (t,  $J = 7.2$  Hz, 1H), 7.40 (t,  $J = 8.0$  Hz, 2H), 7.05-7.03 (m, 2H), 4.95 (t,  $J = 7.6$  Hz, 1H), 3.85 (s, 3H), 3.61-3.59 (m, 5H), 2.28 (s, 3H);  $^{13}\text{C NMR}$  (100 MHz,  $\text{CDCl}_3$ )  $\delta$  195.3, 170.1, 167.8, 143.0, 140.4, 136.6, 133.5, 133.3, 131.4, 128.9, 128.7, 127.8, 126.6, 55.1, 52.5, 52.1, 34.3, 21.5; FT-IR (neat) 2954, 1720, 1686, 1585, 1437, 1266, 1242, 1122, 1082  $\text{cm}^{-1}$ ; HRMS (ESI-TOF)  $m/z$ :  $[\text{M}+\text{Na}]^+$  calcd for  $\text{C}_{20}\text{H}_{20}\text{O}_5\text{Na}$  363.1203; Found 363.1203.

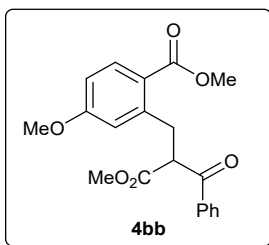

**Methyl 2-(2-benzoyl-3-methoxy-3-oxopropyl)-4-methoxybenzoate 4bb.**

Analytical TLC on silica gel, 1:9 EtOAc/hexane  $R_f = 0.30$ ; colorless liquid; yield 73% (26 mg);  $^1\text{H NMR}$  (600 MHz,  $\text{CDCl}_3$ )  $\delta$  7.94-7.92 (m, 3H), 7.53 (t,  $J = 7.2$  Hz, 1H), 7.41 (t,  $J = 8.4$  Hz, 2H), 6.76 (d,  $J = 2.4$  Hz, 1H), 6.74 (dd,  $J = 8.4, 2.4$  Hz, 1H), 4.97 (t,  $J = 7.8$  Hz, 1H), 3.83 (s, 3H), 3.77 (s, 3H), 3.65-3.61 (m, 5H);  $^{13}\text{C NMR}$  (150 MHz,  $\text{CDCl}_3$ )  $\delta$  195.3, 170.1, 167.2, 162.4, 143.0, 136.6, 133.6, 133.5, 128.9, 128.7, 121.4, 117.6, 112.6, 55.5, 54.9, 52.6, 52.0, 34.7; FT-IR (neat) 3003, 2291, 2253, 1712, 1633, 1441, 1375, 1039  $\text{cm}^{-1}$ ; HRMS (ESI-TOF)  $m/z$ :  $[\text{M}+\text{Na}]^+$  calcd for  $\text{C}_{20}\text{H}_{20}\text{O}_6\text{Na}$  379.1152; Found 379.1152.

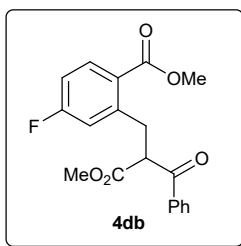

**Methyl 2-(2-benzoyl-3-methoxy-3-oxopropyl)-4-fluorobenzoate 4db.**

Analytical TLC on silica gel, 1:9 EtOAc/hexane  $R_f = 0.42$ ; colorless liquid; yield 66% (23 mg);  $^1\text{H}$  NMR (400 MHz,  $\text{CDCl}_3$ )  $\delta$  7.98-7.94 (m, 3H), 7.55 (t,  $J = 7.6$  Hz, 1H), 7.43 (t,  $J = 8.0$  Hz, 2H), 7.02 (dd,  $J = 9.6, 2.4$  Hz, 1H), 6.96-6.92 (m, 1H), 4.94 (t,  $J = 7.32$  Hz, 1H), 3.86 (s, 3H), 3.68-3.57 (m, 5H);  $^{13}\text{C}$  NMR (125 MHz,  $\text{CDCl}_3$ )  $\delta$  194.8, 169.8, 166.8, 165.7 ( $J_{\text{C-F}} = 252.0$  Hz), 144.0 ( $J_{\text{C-F}} = 8.6$  Hz), 136.4, 133.9 ( $J_{\text{C-F}} = 9.3$  Hz), 133.7, 128.9, 128.8, 125.6 ( $J_{\text{C-F}} = 2.8$  Hz), 119.6 ( $J_{\text{C-F}} = 21.7$  Hz), 114.3 ( $J_{\text{C-F}} = 15.0$  Hz), 54.9, 52.7, 52.3, 34.1;  $^{19}\text{F}$  NMR (376 MHz,  $\text{CDCl}_3$ )  $\delta$  -106.41; FT-IR (neat) 2954, 1721, 1687, 1587, 1437, 1269, 1242, 1122, 1081  $\text{cm}^{-1}$ ; HRMS (ESI-TOF)  $m/z$ :  $[\text{M}+\text{H}]^+$  calcd for  $\text{C}_{19}\text{H}_{18}\text{O}_5\text{F}$  345.1133; Found 345.1134.

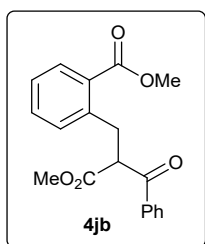

**Methyl 2-(2-benzoyl-3-methoxy-3-oxopropyl)benzoate 4jb.**

Analytical TLC on silica gel, 1:9 EtOAc/hexane  $R_f = 0.51$ ; colorless liquid; yield 70% (23 mg);  $^1\text{H}$  NMR (500 MHz,  $\text{CDCl}_3$ )  $\delta$  7.93 (t,  $J = 7.8$  Hz, 3H), 7.53 (t,  $J = 7.4$  Hz, 1H), 7.41 (t,  $J = 7.7$  Hz, 2H), 7.36 (t,  $J = 7.5$  Hz, 1H), 7.29-7.24 (m, 2H), 4.97 (t,  $J = 7.3$  Hz, 1H), 3.88 (s, 3H), 3.62 (d,  $J = 11.4$  Hz, 5H);  $^{13}\text{C}$  NMR (125 MHz,  $\text{CDCl}_3$ )  $\delta$  195.2, 170.1, 167.8, 140.2, 136.6, 133.6, 132.6, 132.3, 131.2, 129.6, 128.9, 128.7, 127.1, 55.1, 52.6, 52.3, 34.2; FT-IR (neat) 2954, 1721, 1687, 1587, 1437, 1265, 1242, 1145, 1077  $\text{cm}^{-1}$ ; HRMS (ESI-TOF)  $m/z$ :  $[\text{M}+\text{Na}]^+$  calcd for  $\text{C}_{19}\text{H}_{18}\text{O}_5\text{Na}$  349.1046; Found 349.1051.

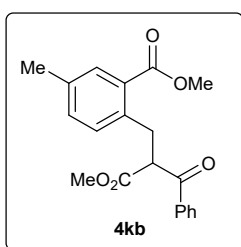

**Methyl 2-(2-benzoyl-3-methoxy-3-oxopropyl)-5-methylbenzoate 4kb.**

Analytical TLC on silica gel, 1:9 EtOAc/hexane  $R_f = 0.39$ ; colorless liquid; yield 75% (25.5 mg);  $^1\text{H}$  NMR (400 MHz,  $\text{CDCl}_3$ )  $\delta$  7.94 (d,  $J = 7.2$  Hz, 2H), 7.73 (s, 1H), 7.53 (t,  $J = 7.2$  Hz,

1H), 7.41 (t,  $J = 8.0$  Hz, 2H), 7.16 (s, 2H), 4.94 (t,  $J = 7.2$  Hz, 1H), 3.86 (s, 3H), 3.61-3.53 (m, 5H), 2.31 (s, 3H);  $^{13}\text{C}$  NMR (100 MHz,  $\text{CDCl}_3$ )  $\delta$  195.2, 170.1, 168.0, 137.1, 136.8, 136.6, 133.5, 133.1, 132.5, 131.7, 129.4, 128.9, 128.7, 55.3, 52.5, 52.2, 33.8, 21.0; FT-IR (neat) 2955, 1719, 1686, 1587, 1438, 1269, 1240, 1123, 1080  $\text{cm}^{-1}$ ; HRMS (ESI-TOF)  $m/z$ :  $[\text{M}+\text{Na}]^+$  calcd for  $\text{C}_{20}\text{H}_{20}\text{O}_5\text{Na}$  363.1203; Found 363.1203.

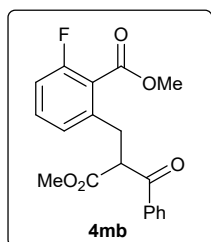

**Methyl 2-(2-benzoyl-3-methoxy-3-oxopropyl)-6-fluorobenzoate 4mb.**

Analytical TLC on silica gel, 1:9 EtOAc/hexane  $R_f = 0.45$ ; colorless liquid; yield 55% (19 mg);  $^1\text{H}$  NMR (500 MHz,  $\text{CDCl}_3$ )  $\delta$  7.92 (d,  $J = 8.5$  Hz, 2H), 7.55 (t,  $J = 7.5$  Hz, 1H), 7.43 (t,  $J = 8.0$  Hz, 2H), 7.24-7.23 (m, 1H), 7.03 (d,  $J = 8.0$  Hz, 1H), 6.95 (t,  $J = 8.5$  Hz, 1H), 4.88 (t,  $J = 7.5$  Hz, 1H), 3.92 (s, 3H), 3.63 (s, 3H), 3.38 (d,  $J = 7.5$  Hz, 2H);  $^{13}\text{C}$  NMR (125 MHz,  $\text{CDCl}_3$ )  $\delta$  194.7, 169.6, 166.2, 161.3 ( $J_{\text{C-F}} = 250.7$  Hz), 139.3 ( $J_{\text{C-F}} = 2.0$  Hz), 136.3, 133.8, 131.8 ( $J_{\text{C-F}} = 9.1$  Hz), 128.9, 128.8, 126.7 ( $J_{\text{C-F}} = 3.2$  Hz), 121.7 ( $J_{\text{C-F}} = 15.5$  Hz), 114.8 ( $J_{\text{C-F}} = 21.8$  Hz), 55.0, 52.8, 52.7, 33.0;  $^{19}\text{F}$  NMR (470 MHz,  $\text{CDCl}_3$ )  $\delta$  -113.06; FT-IR (neat) 2954, 1718, 1687, 1587, 1439, 1264, 1244, 1123, 1081  $\text{cm}^{-1}$ ; HRMS (ESI-TOF)  $m/z$ :  $[\text{M}+\text{H}]^+$  calcd for  $\text{C}_{19}\text{H}_{18}\text{O}_5\text{F}$  345.1133; Found 345.1133.

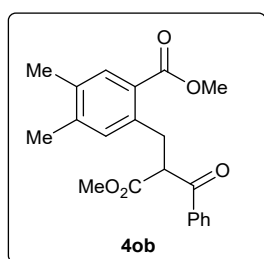

**Methyl 2-(2-benzoyl-3-methoxy-3-oxopropyl)-4,5-dimethylbenzoate 4ob.**

Analytical TLC on silica gel, 1:9 EtOAc/hexane  $R_f = 0.44$ ; colorless liquid; yield 81% (29 mg);  $^1\text{H}$  NMR (500 MHz,  $\text{CDCl}_3$ )  $\delta$  7.92 (d,  $J = 7.5$  Hz, 2H), 7.70 (s, 1H), 7.52 (t,  $J = 7.5$  Hz, 1H), 7.40 (t,  $J = 7.5$  Hz, 2H), 7.01 (s, 1H), 4.92 (t,  $J = 7.5$  Hz, 1H), 3.84 (s, 3H), 3.61 (s, 3H), 3.59-3.54 (m, 2H), 2.21 (s, 3H), 2.19 (s, 3H);  $^{13}\text{C}$  NMR (125 MHz,  $\text{CDCl}_3$ )  $\delta$  195.4, 170.2, 167.9, 141.6, 137.7, 136.7, 135.4, 133.9, 133.5, 132.4, 128.9, 128.7, 126.7, 55.3, 52.5, 52.0, 33.8, 19.8, 19.3; FT-IR (neat) 2958, 1721, 1687, 1587, 1437, 1269, 1242, 1123, 1081,  $\text{cm}^{-1}$ ; HRMS (ESI-TOF)  $m/z$ :  $[\text{M}+\text{H}]^+$  calcd for  $\text{C}_{21}\text{H}_{23}\text{O}_5$  355.1540; Found 355.1542.

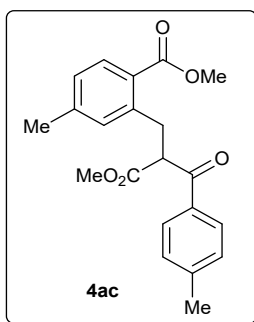

**Methyl 2-(3-methoxy-2-(4-methylbenzoyl)-3-oxopropyl)-4-methyl-**

**benzoate 4ac.** Analytical TLC on silica gel, 1:9 EtOAc/hexane  $R_f = 0.44$ ; colorless liquid; yield 65% (23 mg);  $^1\text{H NMR}$  (500 MHz,  $\text{CDCl}_3$ )  $\delta$  7.84-7.82 (m, 3H), 7.19 (d,  $J = 8.0$  Hz, 2H), 7.05-7.04 (m, 2H), 4.91 (t,  $J = 7.5$  Hz, 1H), 3.85 (s, 3H), 3.60-3.58 (m, 5H), 2.38 (s, 3H), 2.28 (s, 3H);  $^{13}\text{C NMR}$  (125 MHz,  $\text{CDCl}_3$ )  $\delta$  194.8, 170.3, 167.8, 144.5, 142.9, 140.5, 134.1, 133.3, 131.4, 129.4, 129.0, 127.8, 126.6, 55.0, 52.5, 52.1, 34.2, 21.8, 21.5; FT-IR (neat) 2954, 1722, 1687, 1587, 1437, 1269, 1242, 1122, 1081,  $\text{cm}^{-1}$ ; HRMS (ESI-TOF)  $m/z$ :  $[\text{M}+\text{H}]^+$  calcd for  $\text{C}_{21}\text{H}_{23}\text{O}_5$  355.1540; Found 355.1538.

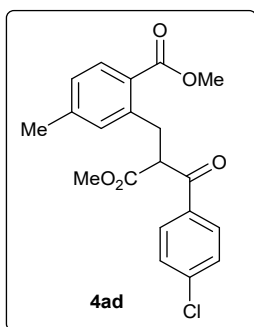

**Methyl 2-(2-(4-chlorobenzoyl)-3-methoxy-3-oxopropyl)-4-methyl-**

**benzoate 4ad.** Analytical TLC on silica gel, 1:9 EtOAc/hexane  $R_f = 0.42$ ; colorless liquid; yield 68% (25.5 mg);  $^1\text{H NMR}$  (600 MHz,  $\text{CDCl}_3$ )  $\delta$  7.86 (d,  $J = 7.8$  Hz, 2H), 7.82 (d,  $J = 7.8$  Hz, 1H), 7.37 (d,  $J = 8.4$  Hz, 2H), 7.06-7.04 (m, 2H), 4.92 (t,  $J = 7.2$  Hz, 1H), 3.86 (s, 3H), 3.61 (s, 3H), 3.58-3.54 (m, 2H), 2.29 (s, 3H);  $^{13}\text{C NMR}$  (150 MHz,  $\text{CDCl}_3$ )  $\delta$  194.3, 169.9, 167.7, 143.1, 140.2, 140.1, 135.0, 133.4, 131.4, 130.3, 129.1, 127.9, 126.5, 55.1, 52.6, 52.1, 34.2, 21.5; FT-IR (neat) 2953, 1721, 1685, 1587, 1437, 1269, 1242, 1123, 1081,  $\text{cm}^{-1}$ ; HRMS (ESI-TOF)  $m/z$ :  $[\text{M}+\text{H}]^+$  calcd for  $\text{C}_{20}\text{H}_{20}\text{O}_5\text{Cl}$  375.0994; Found 375.0994.



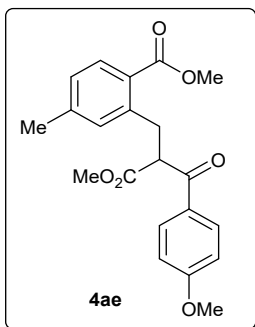

**Methyl 2-(3-methoxy-2-(4-methoxybenzoyl)-3-oxopropyl)-4-methylbenzoate 4ae.** Analytical TLC on silica gel, 1:9 EtOAc/hexane  $R_f = 0.37$ ; colorless liquid; yield 60% (22 mg);  $^1\text{H NMR}$  (400 MHz,  $\text{CDCl}_3$ )  $\delta$  7.92 (d,  $J = 9.0$  Hz, 2H), 7.82 (d,  $J = 7.9$  Hz, 1H), 7.09-7.01 (m, 2H), 6.87 (d,  $J = 9.0$  Hz, 2H), 4.89 (t,  $J = 7.2$  Hz, 1H), 3.85 (d,  $J = 3.3$  Hz, 6H), 3.63-3.56 (m, 5H), 2.28 (s, 3H);  $^{13}\text{C NMR}$  (150 MHz,  $\text{CDCl}_3$ )  $\delta$  193.6, 170.3, 167.8, 163.9, 142.9, 140.5, 133.3, 131.4, 131.3, 129.8, 127.7, 126.7, 113.9, 55.6, 54.9, 52.4, 52.1, 34.3, 21.5; FT-IR (neat) 2957, 1721, 1689, 1587, 1440, 1269, 1244, 1123, 1081,  $\text{cm}^{-1}$ ; HRMS (ESI-TOF)  $m/z$ :  $[\text{M}+\text{Na}]^+$  calcd for  $\text{C}_{21}\text{H}_{22}\text{O}_6\text{Na}$  393.1309; Found 393.1310.

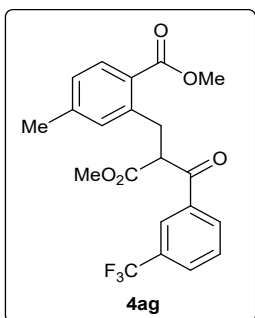

**Methyl 2-(3-methoxy-3-oxo-2-(3-(trifluoromethyl)benzoyl)propyl)-4-methylbenzoate 4ag.** Analytical TLC on silica gel, 1:9 EtOAc/hexane  $R_f = 0.34$ ; colorless liquid; yield 55% (22.5 mg);  $^1\text{H NMR}$  (400 MHz,  $\text{CDCl}_3$ )  $\delta$  8.18 (s, 1H), 8.08 (d,  $J = 8.0$  Hz, 1H), 7.82 (d,  $J = 8.8$  Hz, 1H), 7.76 (d,  $J = 8.0$  Hz, 1H), 7.54 (t,  $J = 8.0$  Hz, 1H), 7.05-7.04 (m, 2H), 5.00 (t,  $J = 7.6$  Hz, 1H), 3.86 (s, 3H), 3.63 (s, 3H), 3.58 (d,  $J = 7.6$  Hz, 2H), 2.28 (s, 3H);  $^{13}\text{C NMR}$  (100 MHz,  $\text{CDCl}_3$ )  $\delta$  194.6, 169.8, 167.7, 143.1, 140.1, 137.2, 134.9 ( $J_{\text{C-F}} = 36.3$  Hz), 133.5, 131.9, 131.5 ( $J_{\text{C-F}} = 271.9$  Hz), 131.4, 129.9 ( $J_{\text{C-F}} = 3.6$  Hz), 129.4, 128.0, 126.4, 125.8 ( $J_{\text{C-F}} = 3.9$  Hz), 55.0, 52.6, 52.1, 34.4, 21.5;  $^{19}\text{F NMR}$  (565 MHz,  $\text{CDCl}_3$ )  $\delta$  -62.86; FT-IR (neat) 2954, 1721, 1686, 1587, 1437, 1270, 1242, 1122, 1080,  $\text{cm}^{-1}$ ; HRMS (ESI-TOF)  $m/z$ :  $[\text{M}+\text{H}]^+$  calcd for  $\text{C}_{21}\text{H}_{20}\text{O}_5\text{F}_3$  409.1257; Found 409.1266.

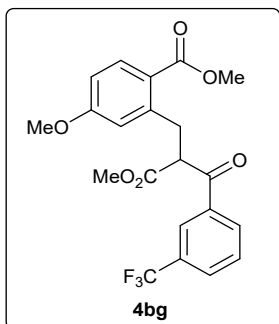

**Methyl 4-methoxy-2-(3-methoxy-3-oxo-2-(3-(trifluoromethyl)benzoyl)propyl)benzoate 4bg.** Analytical TLC on silica gel, 1:9 EtOAc/hexane  $R_f = 0.34$ ; colorless liquid; yield 58% (24.6 mg);  $^1\text{H}$  NMR (400 MHz,  $\text{CDCl}_3$ )  $\delta$  8.21 (s, 1H), 8.10 (d,  $J = 8.0$  Hz, 1H), 7.92 (d,  $J = 8.8$  Hz, 1H), 7.77 (d,  $J = 8.4$  Hz, 1H), 7.55 (t,  $J = 7.6$  Hz, 1H), 6.77-6.73 (m, 2H), 5.02 (t,  $J = 7.2$  Hz, 1H), 3.85 (s, 3H), 3.78 (s, 3H), 3.64-3.61 (m, 5H);  $^{13}\text{C}$  NMR (100 MHz,  $\text{CDCl}_3$ )  $\delta$  194.5, 169.7, 167.2, 162.5, 142.7, 137.1, 135.5 ( $J_{\text{C-F}} = 32.3$  Hz), 133.6, 132.0 ( $J_{\text{C-F}} = 265.7$  Hz), 131.9, 129.9 ( $J_{\text{C-F}} = 3.7$  Hz), 129.4, 125.9 ( $J_{\text{C-F}} = 3.7$  Hz), 121.3, 118.0, 112.6, 55.5, 54.9, 52.7, 52.0, 34.8;  $^{19}\text{F}$  NMR (565 MHz,  $\text{CDCl}_3$ )  $\delta$  -62.87; FT-IR (neat) 3001, 2294, 2256, 1712, 1633, 1441, 1375, 1081  $\text{cm}^{-1}$ ; HRMS (ESI-TOF)  $m/z$ :  $[\text{M}+\text{H}]^+$  calcd for  $\text{C}_{21}\text{H}_{20}\text{O}_6\text{F}_3$  425.1206; Found 425.1205.

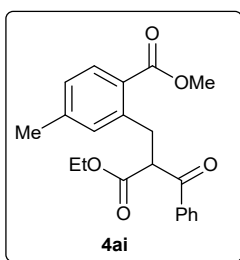

**Methyl 2-(2-benzoyl-3-ethoxy-3-oxopropyl)-4-methylbenzoate 4ai.** Analytical TLC on silica gel, 1:9 EtOAc/hexane  $R_f = 0.48$ ; colorless liquid; yield 72% (25.5 mg);  $^1\text{H}$  NMR (400 MHz,  $\text{CDCl}_3$ )  $\delta$  7.94 (d,  $J = 7.2$  Hz, 2H), 7.84 (d,  $J = 7.9$  Hz, 1H), 7.52 (t,  $J = 7.4$  Hz, 1H), 7.41 (t,  $J = 7.7$  Hz, 2H), 7.10-7.01 (m, 2H), 4.94-4.85 (m, 1H), 4.10-4.03 (m, 2H), 3.84 (s, 3H), 3.66-3.61 (m, 1H), 3.55 (dd,  $J = 13.2, 7.8$  Hz, 1H), 2.29 (s, 3H), 1.08 (t,  $J = 7.1$  Hz, 3H);  $^{13}\text{C}$  NMR (125 MHz,  $\text{CDCl}_3$ )  $\delta$  195.3, 169.7, 167.8, 142.9, 140.5, 136.7, 133.4, 133.3, 131.4, 128.8, 128.7, 127.8, 126.6, 61.4, 55.4, 52.0, 34.2, 21.5, 14.1; FT-IR (neat) 2952, 1715, 1687, 1610, 1444, 1266, 1231, 1186, 1083  $\text{cm}^{-1}$ ; HRMS (ESI-TOF)  $m/z$ :  $[\text{M}+\text{H}]^+$  calcd for  $\text{C}_{21}\text{H}_{23}\text{O}_5$  355.1540; Found 355.1540.

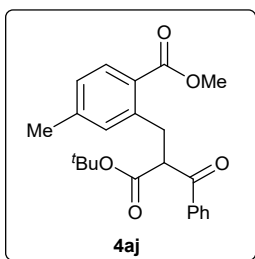

**Methyl 2-(2-benzoyl-3-(*tert*-butoxy)-3-oxopropyl)-4-methylbenzoate**

**4aj.** Analytical TLC on silica gel, 1:9 EtOAc/hexane  $R_f = 0.51$ ; colorless liquid; yield 75% (29 mg);  $^1\text{H NMR}$  (500 MHz,  $\text{CDCl}_3$ )  $\delta$  7.94 (d,  $J = 7.8$  Hz, 2H), 7.84 (d,  $J = 8.0$  Hz, 1H), 7.52 (t,  $J = 7.4$  Hz, 1H), 7.41 (t,  $J = 7.7$  Hz, 2H), 7.09 (s, 1H), 7.06 (d,  $J = 8.1$  Hz, 1H), 4.75 (dd,  $J = 8.1, 6.4$  Hz, 1H), 3.84 (s, 3H), 3.65 (dd,  $J = 13.3, 6.3$  Hz, 1H), 3.47 (dd,  $J = 13.3, 8.3$  Hz, 1H), 2.30 (s, 3H), 1.25 (s, 9H);  $^{13}\text{C NMR}$  (125 MHz,  $\text{CDCl}_3$ )  $\delta$  195.5, 168.8, 167.8, 142.7, 140.7, 136.9, 133.5, 133.2, 131.4, 128.8, 128.6, 127.6, 126.6, 81.9, 56.7, 52.0, 33.9, 27.8, 21.5; FT-IR (neat) 2977, 2924, 1719, 1692, 1594, 1447, 1267, 1147, 1083  $\text{cm}^{-1}$ ; HRMS (ESI-TOF)  $m/z$ :  $[\text{M}+\text{Na}]^+$  calcd for  $\text{C}_{23}\text{H}_{26}\text{O}_5\text{Na}$  405.1672; Found 405.1672.

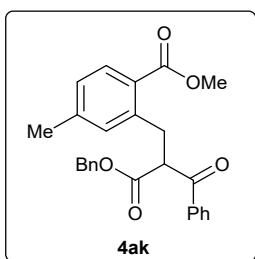

**Methyl 2-(2-benzoyl-3-(benzyloxy)-3-oxopropyl)-4-methylbenzoate**

**4ak.** Analytical TLC on silica gel, 1:9 EtOAc/hexane  $R_f = 0.44$ ; colorless liquid; yield 72% (30 mg);  $^1\text{H NMR}$  (400 MHz,  $\text{CDCl}_3$ )  $\delta$  7.91 (d,  $J = 7.2$  Hz, 2H), 7.82 (d,  $J = 8.0$  Hz, 1H), 7.52 (t,  $J = 7.2$  Hz, 1H), 7.38 (t,  $J = 8.0$  Hz, 2H), 7.26-7.23 (m, 3H), 7.10-7.08 (m, 2H), 7.05-7.02 (m, 2H), 5.07-5.00 (m, 2H), 4.98-4.94 (m, 1H), 3.82 (s, 3H), 3.70-3.64 (m, 1H), 3.59-3.54 (m, 1H), 2.24 (s, 3H);  $^{13}\text{C NMR}$  (100 MHz,  $\text{CDCl}_3$ )  $\delta$  195.1, 169.5, 167.7, 143.0, 140.4, 136.6, 135.5, 133.5, 133.4, 131.4, 128.9, 128.7, 128.5, 128.3, 128.0, 127.8, 126.6, 67.0, 55.5, 52.1, 34.2, 21.5; FT-IR (neat) 2951, 1715, 1687, 1610, 1448, 1267, 1218, 1161, 1083  $\text{cm}^{-1}$ ; HRMS (ESI-TOF)  $m/z$ :  $[\text{M}+\text{H}]^+$  calcd for  $\text{C}_{26}\text{H}_{25}\text{O}_5$  417.1697; Found 417.1697.

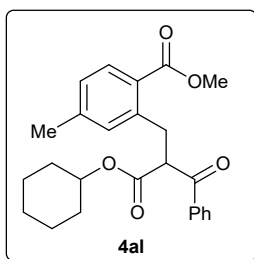

**Methyl 2-(2-benzoyl-3-(cyclohexyloxy)-3-oxopropyl)-4-methylben-**

**zoate 4al.** Analytical TLC on silica gel, 1:9 EtOAc/hexane  $R_f = 0.49$ ; colorless liquid; yield 67% (27.4 mg);  $^1\text{H NMR}$  (400 MHz,  $\text{CDCl}_3$ )  $\delta$  7.95 (d,  $J = 7.2$  Hz, 2H), 7.83 (d,  $J = 8.0$  Hz, 1H), 7.52 (t,  $J = 7.2$  Hz, 1H), 7.41 (t,  $J = 8.0$  Hz, 2H), 7.08-7.05 (m, 2H), 4.86-4.83 (m, 1H), 4.72-4.66 (m, 1H), 3.84 (s, 3H), 3.71-3.66 (m, 1H), 3.52-3.47 (m, 1H), 2.29 (s, 3H), 1.53-1.14 (m, 10H);  $^{13}\text{C NMR}$  (100 MHz,  $\text{CDCl}_3$ )  $\delta$  195.2, 169.2, 167.7, 142.8, 140.6, 136.7, 133.4, 131.4, 128.8, 128.6, 127.7, 126.6, 73.6, 55.9, 52.0, 34.0, 31.24, 31.22, 25.4, 23.45, 23.38, 21.5; FT-IR (neat) 2979, 2926, 1718, 1692, 1594, 1448, 1268, 1147, 1081  $\text{cm}^{-1}$ ; HRMS (ESI-TOF)  $m/z$ :  $[\text{M}+\text{H}]^+$  calcd for  $\text{C}_{25}\text{H}_{29}\text{O}_5$  409.2010; Found 409.2008.

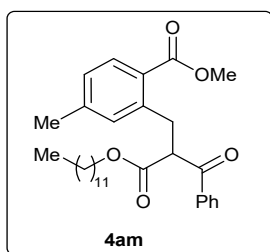

**Methyl 2-(2-benzoyl-3-(dodecyloxy)-3-oxopropyl)-4-methyl-**

**benzoate 4am.** Analytical TLC on silica gel, 1:9 EtOAc/hexane  $R_f = 0.52$ ; colorless liquid; yield 71% (35 mg);  $^1\text{H NMR}$  (500 MHz,  $\text{CDCl}_3$ )  $\delta$  7.94 (d,  $J = 7.9$  Hz, 2H), 7.84 (d,  $J = 7.9$  Hz, 1H), 7.52 (t,  $J = 7.0$  Hz, 1H), 7.41 (t,  $J = 7.7$  Hz, 2H), 7.09-7.03 (m, 2H), 4.90 (t,  $J = 7.2$  Hz, 1H), 3.98 (td,  $J = 6.5, 2.7$  Hz, 2H), 3.84 (s, 3H), 3.64 (dd,  $J = 13.2, 6.6$  Hz, 1H), 3.55 (dd,  $J = 13.3, 7.8$  Hz, 1H), 2.29 (s, 3H), 1.45-1.41 (m, 2H), 1.25-1.09 (m, 18H), 0.88 (t,  $J = 7.0$  Hz, 3H);  $^{13}\text{C NMR}$  (125 MHz,  $\text{CDCl}_3$ )  $\delta$  195.2, 169.7, 167.8, 142.9, 140.6, 136.7, 133.4, 133.4, 131.4, 128.9, 128.7, 127.8, 126.6, 65.6, 55.5, 52.1, 34.1, 32.1, 29.8, 29.8, 29.7, 29.6, 29.5, 29.3, 28.5, 25.8, 22.8, 21.5, 14.3; FT-IR (neat) 2933, 2917, 1719, 1692, 1594, 1447, 1268, 1147, 1083  $\text{cm}^{-1}$ ; HRMS (ESI-TOF)  $m/z$ :  $[\text{M}+\text{H}]^+$  calcd for  $\text{C}_{31}\text{H}_{43}\text{O}_5$  495.3105; Found 495.3110.

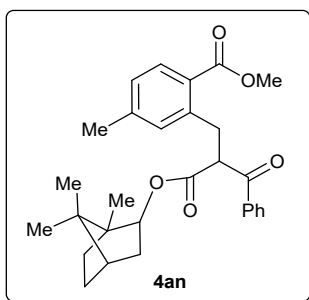

**Methyl 2-(2-benzoyl-3-oxo-3-(((1S,4S)-1,7,7-trimethyl-bicyclo[2.2.1]heptan-2-yl)oxy)propyl)-4-methylbenzoate 4an.** Analytical TLC on silica gel, 1:9 EtOAc/hexane  $R_f = 0.44$ ; colorless liquid; yield 64% (29.6 mg); 1:1 mixture of diastereomers;  $^1\text{H}$  NMR (500 MHz,  $\text{CDCl}_3$ )  $\delta$  7.97 (t,  $J = 7.0$  Hz, 4H), 7.87-7.84 (m, 2H), 7.53 (t,  $J = 7.0$  Hz, 2H), 7.44-7.40 (m, 4H), 7.10-7.05 (m, 4H), 4.89 (t,  $J = 7.0$  Hz, 2H), 4.73 (t,  $J = 9.5$  Hz, 2H), 3.85-3.83 (m, 6H), 3.74-3.68 (m, 2H), 3.53-3.47 (m, 2H), 2.30 (s, 6H), 2.24-2.12 (m, 2H), 1.66-1.63 (m, 2H), 1.56-1.51 (m, 4H), 1.15-1.02 (m, 4H), 0.90-0.84 (m, 2H), 0.80-0.78 (m, 12H), 0.72 (s, 3H), 0.50 (s, 3H);  $^{13}\text{C}$  NMR (125 MHz,  $\text{CDCl}_3$ )  $\delta$  194.97, 194.95, 170.0, 169.9, 167.7, 142.9, 140.7, 140.6, 136.8, 133.43, 133.38, 133.3, 131.5, 128.9, 128.8, 128.7, 127.8, 126.63, 126.60, 81.3, 81.2, 56.0, 55.8, 52.0, 48.8, 47.9, 47.8, 44.9, 44.8, 36.4, 36.3, 34.0, 33.8, 28.0, 27.8, 27.0, 21.5, 19.7, 18.9, 13.5, 13.1; FT-IR (neat) 2953, 1719, 1690, 1610, 1449, 1267, 1233, 1187, 1083  $\text{cm}^{-1}$ ; HRMS (ESI-TOF)  $m/z$ :  $[\text{M}+\text{H}]^+$  calcd for  $\text{C}_{29}\text{H}_{35}\text{O}_5$  463.2479; Found 463.2477.

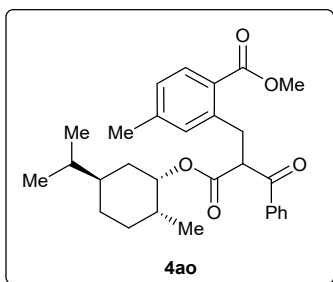

**Methyl 2-(2-benzoyl-3-(((1S,2R,5R)-5-isopropyl-2-methyl-cyclohexyl)oxy)-3-oxopropyl)-4-methylbenzoate 4ao.** Analytical TLC on silica gel, 1:9 EtOAc/hexane  $R_f = 0.44$ ; colorless liquid; yield 61% (28.3 mg); 1:1 mixture of diastereomers;  $^1\text{H}$  NMR (500 MHz,  $\text{CDCl}_3$ )  $\delta$  7.98 (d,  $J = 7.5$  Hz, 2H), 7.92 (d,  $J = 7.5$  Hz, 2H), 7.86 (t,  $J = 8.5$  Hz, 2H), 7.55-7.51 (m, 2H), 7.43-7.38 (m, 4H), 7.10-7.06 (m, 4H), 4.88-4.85 (m, 2H), 4.56-4.49 (m, 2H), 3.84 (s, 6H), 3.76-3.68 (m, 2H), 3.51-3.41 (m, 2H), 2.31-2.30 (m, 6H), 1.80-1.78 (m, 1H), 1.67-1.65 (m, 1H), 1.56-1.52 (m, 6H), 1.40-1.32 (m, 2H), 1.23-1.16 (m, 4H), 0.93-0.86 (m, 4H), 0.84 (d,  $J = 6.5$  Hz, 3H), 0.80 (d,  $J = 6.5$  Hz, 3H), 0.72 (d,  $J = 7.5$  Hz, 3H), 0.62 (d,  $J = 7.0$  Hz, 3H), 0.53 (d,  $J = 7.0$  Hz, 3H), 0.33 (d,  $J = 7.0$  Hz, 3H);  $^{13}\text{C}$  NMR (125 MHz,  $\text{CDCl}_3$ )  $\delta$  195.2, 194.7, 169.4, 169.1, 167.8, 167.7, 142.9, 140.6, 136.8, 136.6, 133.5, 133.43,

133.41, 133.3, 131.54, 131.46, 128.9, 128.8, 128.64, 128.58, 127.8, 127.7, 126.6, 126.5, 75.6, 75.5, 56.4, 55.8, 52.05, 52.02, 46.8, 40.7, 40.5, 34.22, 34.19, 34.16, 34.0, 31.4, 31.3, 25.73, 25.67, 23.1, 22.9, 22.11, 22.07, 21.5, 20.9, 20.8, 15.7; FT-IR (neat) 2953, 2869, 1718, 1688, 1611, 1449, 1266, 1231, 1185, 1083  $\text{cm}^{-1}$ ; HRMS (ESI-TOF)  $m/z$ :  $[\text{M}+\text{H}]^+$  calcd for  $\text{C}_{29}\text{H}_{37}\text{O}_5$  465.2636; Found 465.2636.

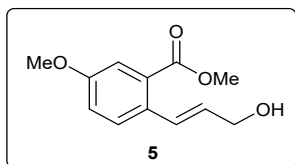

**Methyl (E)-2-(3-hydroxyprop-1-en-1-yl)-5-methoxybenzoate 5.**

Analytical TLC on silica gel, 1:9 EtOAc/hexane  $R_f = 0.36$ ; colorless liquid; yield 93% (20.7 mg);  $^1\text{H}$  NMR (500 MHz,  $\text{CDCl}_3$ )  $\delta$  7.49 (d,  $J = 8.5$  Hz, 1H), 7.38-7.37 (m, 1H), 7.30 (d,  $J = 15.5$  Hz, 1H), 7.04-7.02 (m, 1H), 6.20-6.15 (m, 1H), 4.32 (d,  $J = 6.0$  Hz, 2H), 3.90 (s, 3H), 3.86-3.84 (m, 4H);  $^{13}\text{C}$  NMR (125 MHz,  $\text{CDCl}_3$ )  $\delta$  167.8, 158.8, 131.3, 129.8, 129.7, 129.6, 128.9, 118.8, 114.8, 64.1, 55.6, 52.3; FT-IR (neat) 3440, 2954, 1720, 1594, 1438, 1256, 1207, 1137, 1072  $\text{cm}^{-1}$ ; HRMS (ESI-TOF)  $m/z$ :  $[\text{M}+\text{Na}]^+$  calcd for  $\text{C}_{12}\text{H}_{14}\text{O}_4\text{Na}$  245.0784; Found 245.0787.

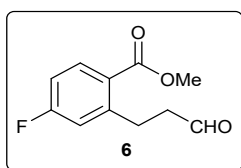

**Methyl 4-fluoro-2-(3-oxopropyl)benzoate 6.**

Analytical TLC on silica gel, 1:9 EtOAc/hexane  $R_f = 0.42$ ; colorless liquid; yield 89% (18.7 mg);  $^1\text{H}$  NMR (400 MHz,  $\text{CDCl}_3$ )  $\delta$  9.82 (t,  $J = 1.2$  Hz, 1H), 8.00-7.96 (m, 1H), 7.01-6.94 (m, 2H), 3.88 (s, 3H), 3.28 (t,  $J = 9.0$  Hz, 2H), 2.84-2.80 (m, 2H);  $^{13}\text{C}$  NMR (100 MHz,  $\text{CDCl}_3$ )  $\delta$  201.3, 166.8, 166.2 ( $J_{\text{C-F}} = 252.0$  Hz), 146.5 ( $J_{\text{C-F}} = 8.4$  Hz), 134.0 ( $J_{\text{C-F}} = 9.3$  Hz), 125.3 ( $J_{\text{C-F}} = 3.0$  Hz), 118.3 ( $J_{\text{C-F}} = 21.4$  Hz), 113.8 ( $J_{\text{C-F}} = 21.2$  Hz), 52.2, 45.3, 27.4;  $^{19}\text{F}$  NMR (470 MHz,  $\text{CDCl}_3$ )  $\delta$  -106.59; FT-IR (neat) 2956, 1717, 1630, 1594, 1442, 1256, 1208, 1137, 1072  $\text{cm}^{-1}$ ; HRMS (ESI-TOF)  $m/z$ :  $[\text{M}+\text{H}]^+$  calcd for  $\text{C}_{11}\text{H}_{12}\text{O}_3\text{F}$  211.0765; Found 211.0761.

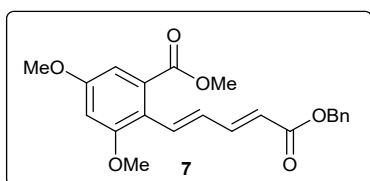

**Methyl 2-((1E,3E)-5-(benzyloxy)-5-oxopenta-1,3-dien-1-yl)-3,5-dimethoxybenzoate 7.**

Analytical TLC on silica gel, 1:9 EtOAc/hexane  $R_f = 0.44$ ; yellow solid; mp 75-76  $^\circ\text{C}$ ; yield 87% (33 mg);  $^1\text{H}$  NMR (500 MHz,  $\text{CDCl}_3$ )  $\delta$  7.47 (dd,  $J = 15.5, 11.5$

Hz, 1H), 7.40-7.31 (m, 5H), 7.19 (d,  $J = 15.5$  Hz, 1H), 6.95 (dd,  $J = 15.5, 11.0$  Hz, 1H), 6.82-6.81 (m, 1H), 6.59-6.58 (m, 1H), 5.95 (d,  $J = 15.5$  Hz, 1H), 5.21 (s, 2H), 3.88 (s, 3H), 3.86 (s, 3H), 3.84 (s, 3H);  $^{13}\text{C}$  NMR (125 MHz,  $\text{CDCl}_3$ )  $\delta$  168.9, 167.2, 160.3, 159.8, 147.1, 136.4, 134.9, 133.8, 130.5, 128.7, 128.3, 128.2, 120.1, 118.2, 105.8, 101.8, 66.2, 56.0, 55.7, 52.7; FT-IR (neat) 2949, 1712, 1596, 1457, 1327, 1241, 1210, 1125, 1058  $\text{cm}^{-1}$ ; HRMS (ESI-TOF)  $m/z$ :  $[\text{M}+\text{H}]^+$  calcd for  $\text{C}_{22}\text{H}_{23}\text{O}_6$  383.1489; Found 383.1489.

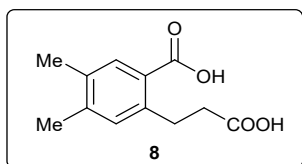

**2-(2-Carboxyethyl)-4,5-dimethylbenzoic acid 8.** Analytical TLC on

silica gel, 6:4 EtOAc/hexane  $R_f = 0.30$ ; colorless solid; mp  $>200$  °C; yield 72% (16 mg);  $^1\text{H}$  NMR (400 MHz,  $\text{DMSO}-d_6$ )  $\delta$  12.36 (bs, 2H), 7.60 (s, 1H), 7.09 (s, 1H), 3.06 (t,  $J = 7.6$  Hz, 2H), 2.46 (t,  $J = 8.0$  Hz, 2H), 2.22 (s, 3H), 2.20 (s, 3H);  $^{13}\text{C}$  NMR (100 MHz,  $\text{DMSO}-d_6$ )  $\delta$  173.9, 168.5, 140.7, 139.6, 134.2, 132.1, 131.6, 127.3, 35.5, 28.8, 19.3, 18.8; FT-IR (neat) 3440, 2954, 1710, 1594, 1438, 1256, 1207, 1137  $\text{cm}^{-1}$ ; HRMS (ESI-TOF)  $m/z$ :  $[\text{M}+\text{H}]^+$  calcd for  $\text{C}_{12}\text{H}_{15}\text{O}_4$  223.0965; Found 223.0960.

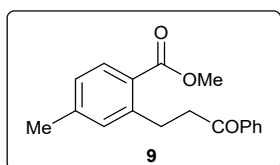

**Methyl 4-methyl-2-(3-oxo-3-phenylpropyl)benzoate 9.** Analytical

TLC on silica gel, 1:9 EtOAc/hexane  $R_f = 0.32$ ; colorless liquid; yield 91% (25.7 mg);  $^1\text{H}$  NMR (500 MHz,  $\text{CDCl}_3$ )  $\delta$  7.98 (d,  $J = 7.5$  Hz, 2H), 7.84 (d,  $J = 8.0$  Hz, 1H), 7.54 (t,  $J = 7.0$  Hz, 1H), 7.44 (t,  $J = 8.0$  Hz, 2H), 7.15 (s, 1H), 7.08 (d,  $J = 8.0$  Hz, 1H), 3.87 (s, 3H), 3.35-3.34 (m, 4H), 2.36 (s, 3H);  $^{13}\text{C}$  NMR (125 MHz,  $\text{CDCl}_3$ )  $\delta$  199.7, 167.9, 143.7, 143.0, 137.1, 133.1, 132.4, 131.3, 128.7, 128.3, 127.2, 126.6, 52.0, 40.8, 29.6, 21.6; FT-IR (neat) 2926, 1717, 1685, 1448, 1268, 1204, 1082, 973  $\text{cm}^{-1}$ ; HRMS (ESI-TOF)  $m/z$ :  $[\text{M}+\text{H}]^+$  calcd for  $\text{C}_{18}\text{H}_{19}\text{O}_3$  283.1329; Found 283.1328.

## H/D Exchange Experiments

### C-H Alkenylation

**H/D Exchange Experiment of 1b with  $\text{D}_2\text{O}$  in Absence of 2a.** 4-Methoxybenzoic acid **1b** (0.1 mmol, 15.2 mg),  $\text{Pd}(\text{OAc})_2$  (0.01 mmol, 2.3 mg),  $\text{Ag}_2\text{CO}_3$  (0.2 mmol, 55 mg), 1,4-benzoquinone (0.1 mmol, 11 mg) and  $\text{D}_2\text{O}$  (1 mmol, 18  $\mu\text{L}$ ) were stirred in HFIP (1 mL) at

110 ° C (in a pre-heated oil bath) in a sealed tube for 6 h. The reaction mixture was cooled to room temperature, diluted with EtOAc (5 mL) and passed through a short pad of celite. Evaporation of the solvent gave a residue that was stirred with  $K_2CO_3$  (0.3 mmol, 41.5 mg) and MeI (0.5 mmol, 31  $\mu$ L) in acetone (2 mL) at room temperature for 3 h. After completion (monitored by TLC), the solvent was evaporated under reduced pressure and residue was mixed with water (10 mL) and extracted with EtOAc (2 x 10 mL). Drying ( $Na_2SO_4$ ) and evaporation of the solvent gave a residue that was purified on silica gel column chromatography using n-hexane and EtOAc as an eluent to afford **1b-d<sub>n</sub>**. The deuterium incorporation of **1b-d<sub>n</sub>** was calculated based on its 400 MHz  $^1H$  NMR spectrum (See the following  $^1H$  NMR spectrum).

HBH-334-SM-W2a

8.004  
7.981  
7.260  
6.927  
6.905

3.884  
3.859

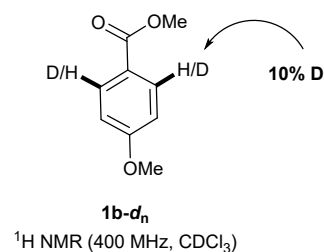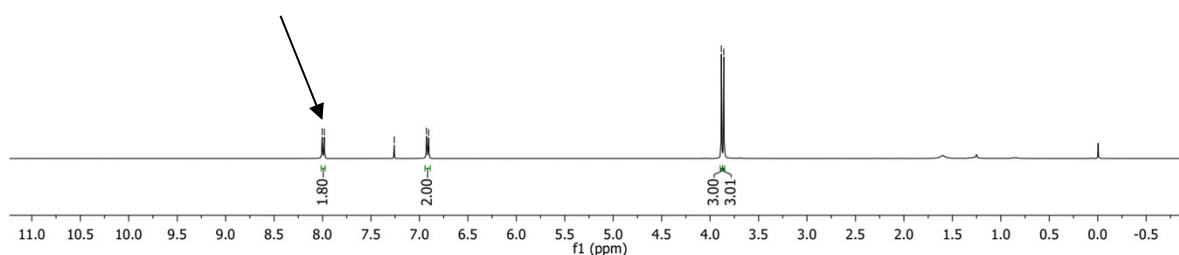

## C-H Alkenylation

**H/D Exchange Experiment of 1b with D<sub>2</sub>O in Presence of 2a.** 4-Methoxybenzoic acid **1b** (0.1 mmol, 15.2 mg), MBH alcohol **2a** (0.11 mmol, 12.8 mg),  $Pd(OAc)_2$  (0.01 mmol, 2.3 mg),  $Ag_2CO_3$  (0.2 mmol, 55 mg), 1,4-benzoquinone (0.1 mmol, 11 mg) and  $D_2O$  (1 mmol, 18  $\mu$ L) were stirred in HFIP (1 mL) at 110 ° C (in a pre-heated oil bath) in a sealed tube for 6 h. The reaction mixture was cooled to room temperature, diluted with EtOAc (5 mL) and passed through a short pad of celite. Evaporation of the solvent gave a residue that was stirred with  $K_2CO_3$  (0.3 mmol, 41.5 mg) and MeI (0.5 mmol, 31  $\mu$ L) in acetone (2 mL) at room temperature for 3 h. After completion (monitored by TLC), the solvent was evaporated under reduced



pressure and the residue was mixed with water (10 mL) and extracted with EtOAc (2 x 10 mL). Drying ( $\text{Na}_2\text{SO}_4$ ) and evaporation of the solvent gave a residue that was purified on silica gel column chromatography using n-hexane and EtOAc as an eluent to afford **3ba-d<sub>n</sub>** and **1b-d<sub>n</sub>**. The deuterium incorporation of **1b-d<sub>n</sub>** and **3ba-d<sub>n</sub>** were calculated based on their respective 400 MHz  $^1\text{H}$  NMR spectrum (See the following  $^1\text{H}$  NMR spectrums).

HBH-334-SM-1H.1.fid

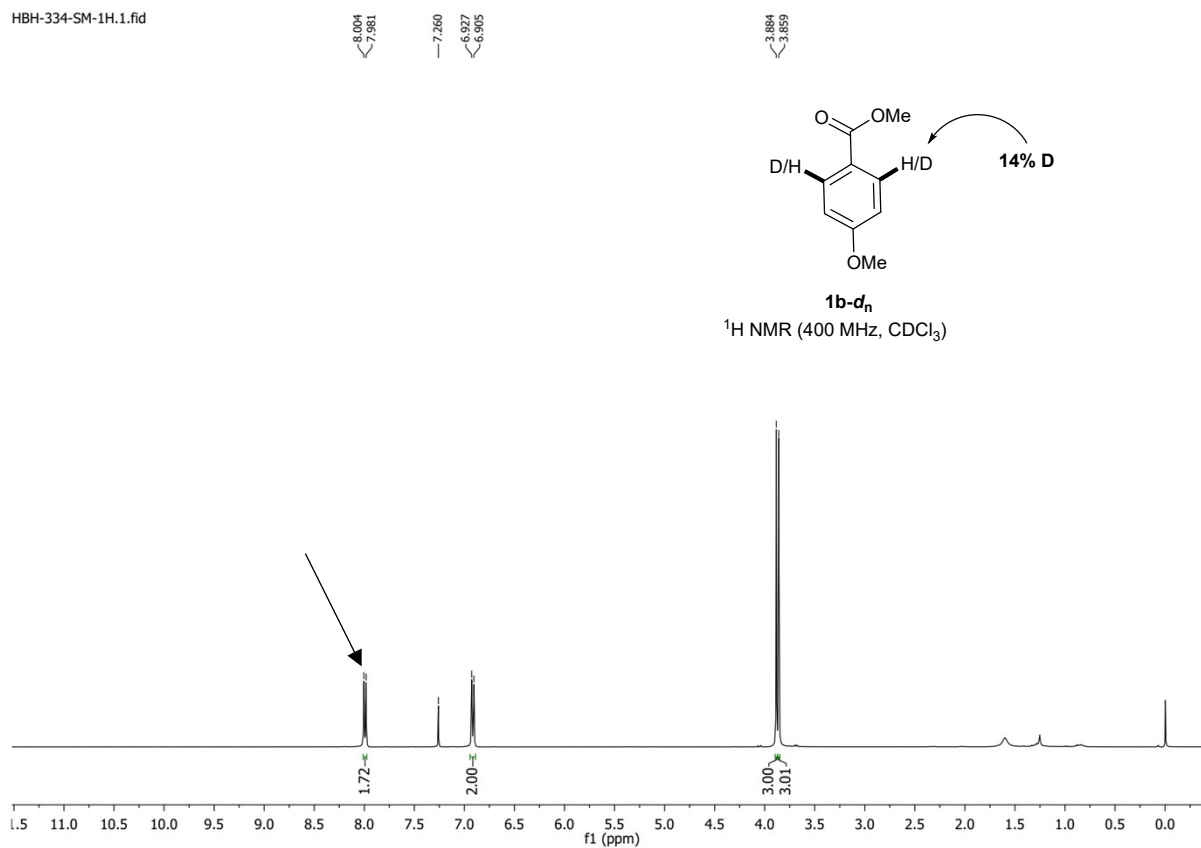

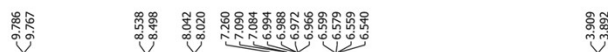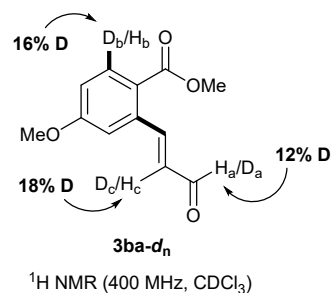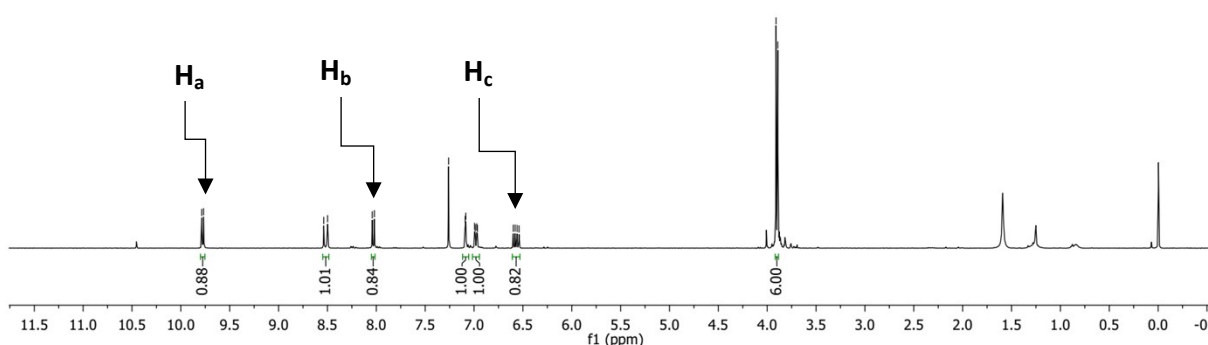

## C-H Alkylation

**H/D Exchange Experiment of 1b with D<sub>2</sub>O in Absence of 2b.** 4-Methoxybenzoic acid **1b** (0.1 mmol, 15.2 mg), Pd(OAc)<sub>2</sub> (0.01 mmol, 2.3 mg), Ag<sub>2</sub>CO<sub>3</sub> (0.2 mmol, 55 mg) and D<sub>2</sub>O (1 mmol, 18 μL) were stirred in TFE (1 mL) at 110 °C (in a pre-heated oil bath) in a sealed tube for 6 h. The reaction mixture was cooled to room temperature, diluted with EtOAc (5 mL) and passed through a short pad of celite. Evaporation of the solvent gave a residue that was stirred with K<sub>2</sub>CO<sub>3</sub> (0.3 mmol, 41.5 mg) and MeI (0.5 mmol, 31 μL) in acetone (2 mL) at room temperature for 3 h. After completion (monitored by TLC), the solvent was evaporated under reduced pressure and the residue was mixed with water (10 mL) and extracted with EtOAc (2 x 10 mL). Drying (Na<sub>2</sub>SO<sub>4</sub>) and evaporation of the solvent gave a residue that was purified on silica gel column chromatography using n-hexane and EtOAc as an eluent to afford **1b-d<sub>n</sub>**. The deuterium incorporation of **1b-d<sub>n</sub>** was calculated based on its 400 MHz <sup>1</sup>H NMR spectrum (See the following <sup>1</sup>H NMR spectrum).

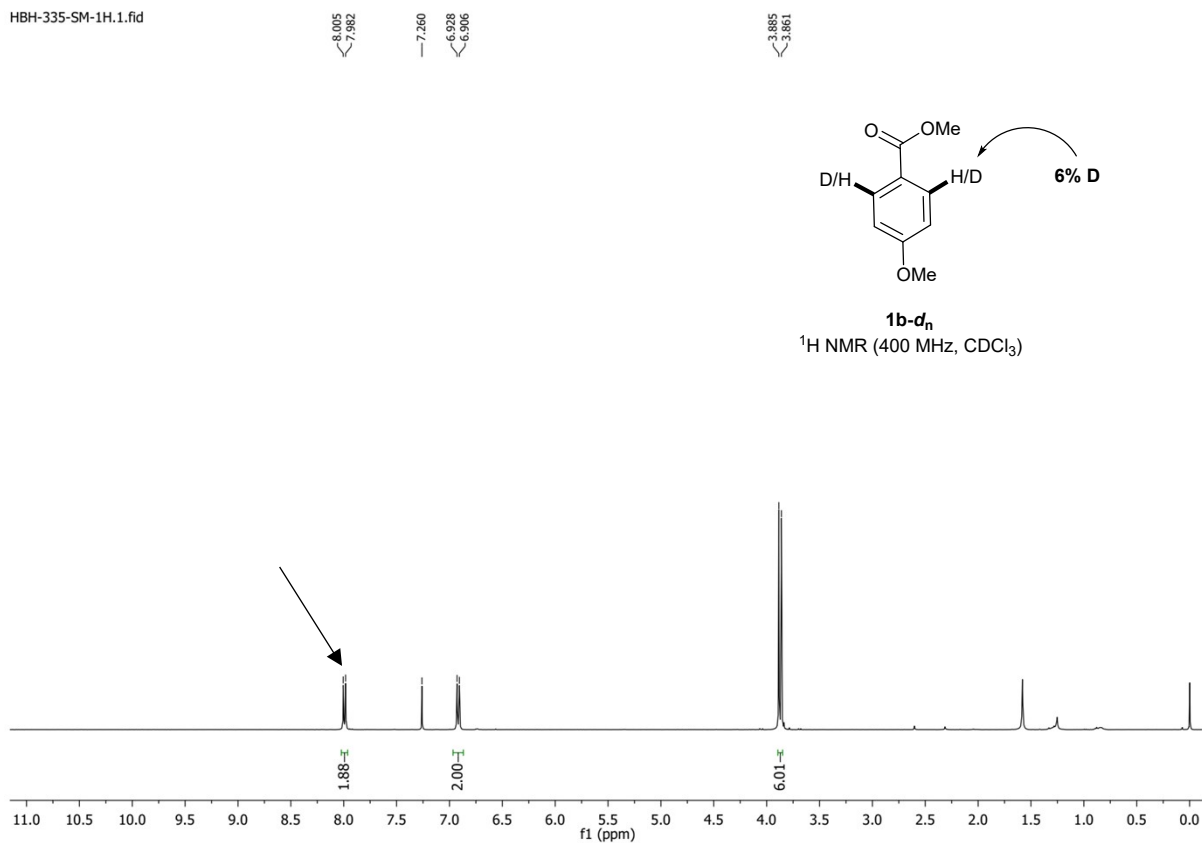

## C-H Alkylation

**H/D Exchange Experiment of 1b with D<sub>2</sub>O in Presence of 2b.** 4-Methoxybenzoic acid **1b** (0.1 mmol, 15.2 mg), MBH alcohol **2b** (0.11 mmol, 21 mg), Pd(OAc)<sub>2</sub> (10 mol %, 0.01 mmol, 2.3 mg), Ag<sub>2</sub>CO<sub>3</sub> (0.2 mmol, 55 mg) and D<sub>2</sub>O (1 mmol, 18 μL) were stirred in TFE (1 mL) at 110 °C (in a pre-heated oil bath) in a sealed tube for 6 h. The reaction mixture was cooled to room temperature, diluted with EtOAc (5 mL) and passed through a short celite pad. Evaporation of the solvent gave a residue that was stirred with K<sub>2</sub>CO<sub>3</sub> (0.3 mmol, 41.5 mg) and MeI (0.5 mmol, 31 μL) in acetone (2 mL) at room temperature for 3 h. After completion (monitored by TLC), the solvent was evaporated under reduced pressure and the residue was mixed with water (10 mL) and extracted using EtOAc (2 x 10 mL). Drying (Na<sub>2</sub>SO<sub>4</sub>) and evaporation of the solvent gave a residue that was purified on silica gel column chromatography using n-hexane and EtOAc as an eluent to afford **4bb-d<sub>n</sub>** and **1b-d<sub>n</sub>**. The deuterium incorporation of **1b-d<sub>n</sub>** and **4bb-d<sub>n</sub>** were calculated based on their respective 400 MHz <sup>1</sup>H NMR spectrum (See the following <sup>1</sup>H NMR spectrums).

HBH-335-SM-WITH2B

8.005  
7.962  
7.260  
6.938  
6.906

3.885  
3.861

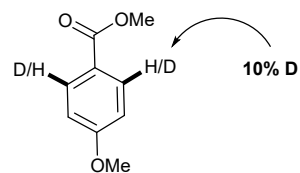

**1b-d<sub>n</sub>**  
<sup>1</sup>H NMR (400 MHz, CDCl<sub>3</sub>)

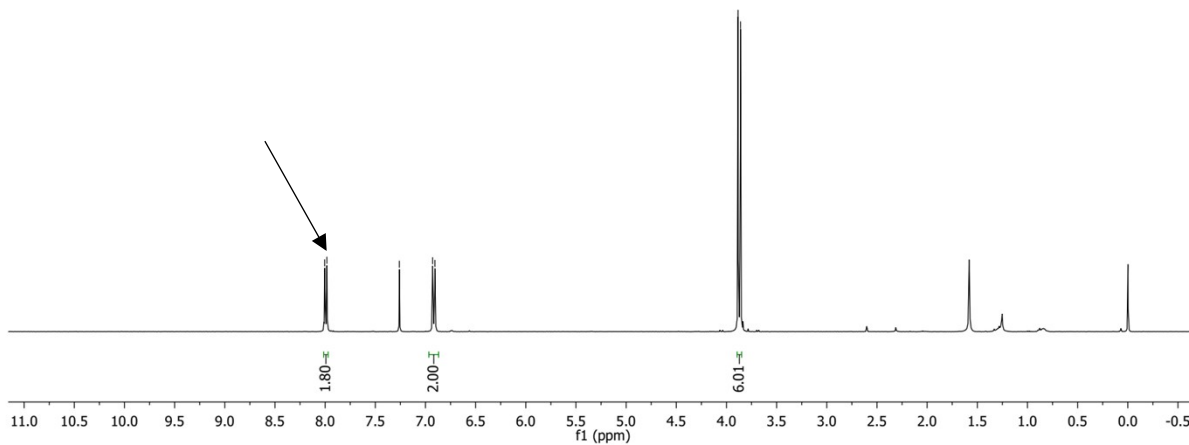

HBH-335-P-1-1H.1.fid

7.947  
7.941  
7.932  
7.926  
7.919  
7.550  
7.531  
7.510  
7.444  
7.425  
7.408  
7.390  
7.260  
6.769  
6.763  
6.752  
6.745  
6.738  
6.724

4.987  
4.969  
4.951

3.855  
3.771  
3.662  
3.637  
3.622

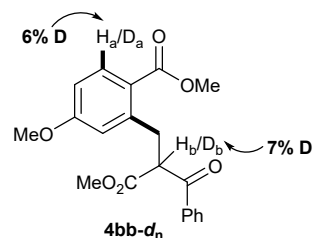

**4bb-d<sub>n</sub>**  
<sup>1</sup>H NMR (400 MHz, CDCl<sub>3</sub>)

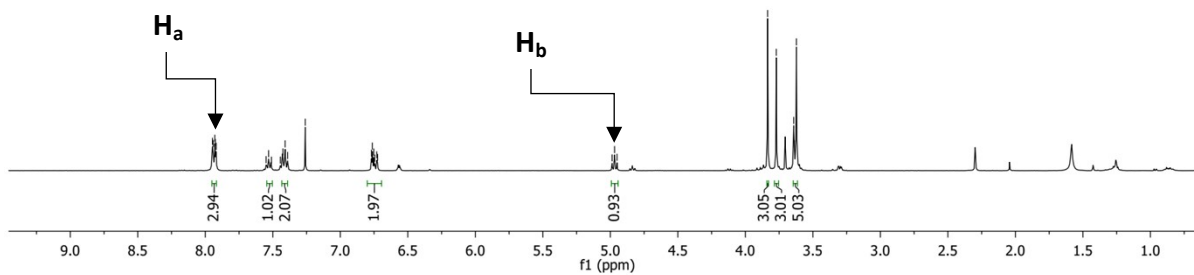

**Preparation of 4-Methoxybenzoic-2,6- $d_2$  acid **1b- $d_2$** .**<sup>14</sup> 4-Methoxybenzoic acid **1b** (0.50 mmol, 68 mg), [Ru(O<sub>2</sub>CAd)<sub>2</sub>(*p*-cymene)] (5 mol %, 14.9 mg) and D<sub>2</sub>O (5 mmol, 90  $\mu$ L) were stirred in 1,4-dioxane (1 mL) at 100 °C for 16 h under N<sub>2</sub> atmosphere. After cooling to room temperature, the residue was diluted with CH<sub>2</sub>Cl<sub>2</sub> (8 mL) and passed through a short pad of celite and all the volatiles were removed under reduced pressure and the residue was purified using silica gel column chromatography with n-hexane and EtOAc as an eluent to afford **1b- $d_2$**  [91% D].

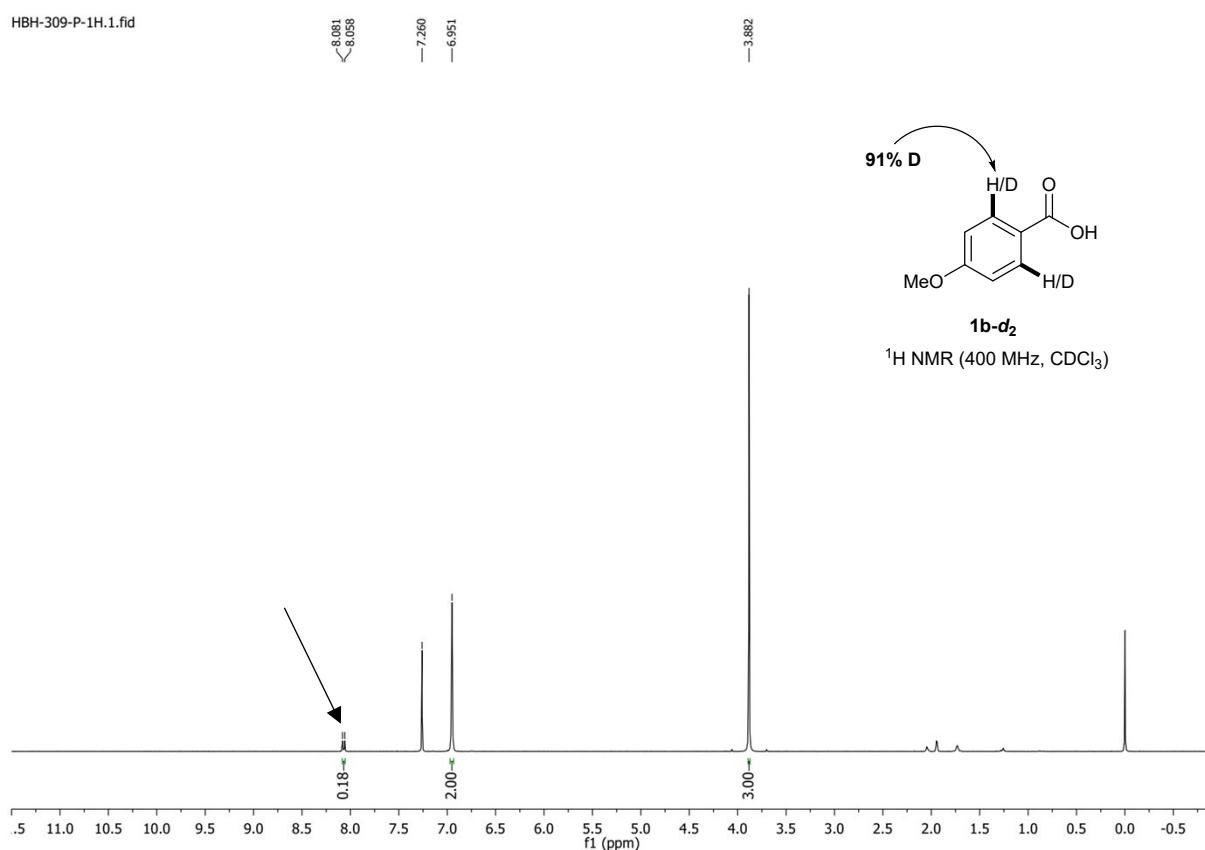

## Kinetic Isotope Effect Experiments

### For C-H Alkenylation

**Parallel Experiment:** 4-Methoxybenzoic acid **1b** (15.2 mg) or **1b- $d_2$**  [91% D] (15.4 mg), 0.1 mmol), MBH alcohol **2a** (0.11 mmol, 12.8 mg), Pd(OAc)<sub>2</sub> (10 mol %, 0.01 mmol, 2.3 mg), Ag<sub>2</sub>CO<sub>3</sub> (0.2 mmol, 55 mg) and 1,4-benzoquinone (0.1 mmol, 11 mg) were stirred in HFIP (1 mL) at 110 °C (in a pre-heated oil bath) in a sealed tube for 2 h. The reaction mixture was cooled to room temperature, diluted with EtOAc (10 mL) and passed through a short celite pad. Evaporation of the solvent gave a residue that was stirred with K<sub>2</sub>CO<sub>3</sub> (0.3 mmol, 41.5 mg) and

MeI (0.5 mmol, 31  $\mu$ L) in acetone (2 mL) at room temperature for 1 h. The solvent was removed under vacuum and purification was performed as described in the general procedure to afford **3ba** and **3ba-d**. The KIE value was determined to be  $k_H/k_D = 2.02$  on the basis of  $^1\text{H}$  NMR analysis.

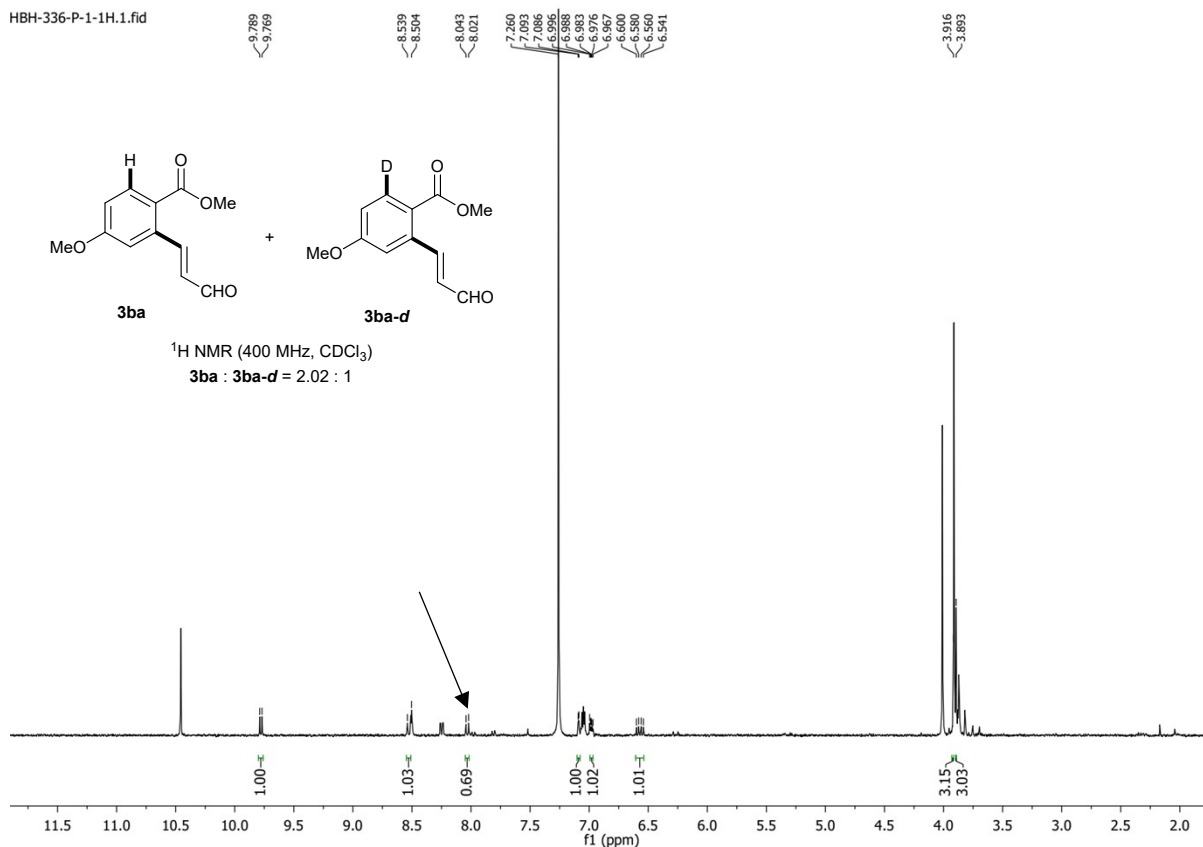

### For C-H Alkenylation

**Competitive Experiment:** 4-Methoxybenzoic acid **1b** (0.05 mmol, 7.6 mg), 4-methoxybenzoic acid- $d_2$  **1b-d<sub>2</sub>** [91% D] (0.05 mmol, 7.7 mg), MBH alcohol **2a** (0.11 mmol, 12.8 mg),  $\text{Pd}(\text{OAc})_2$  (10 mol %, 0.01 mmol, 2.3 mg),  $\text{Ag}_2\text{CO}_3$  (0.2 mmol, 55 mg) and 1,4-benzoquinone (0.1 mmol, 11 mg) were stirred in HFIP (1 mL) at 110  $^\circ\text{C}$  (in a pre-heated oil bath) in a sealed tube for 2 h. The reaction mixture was cooled to room temperature, diluted with EtOAc (10 mL) and passed through a short celite pad. Evaporation of the solvent gave a residue that was stirred with  $\text{K}_2\text{CO}_3$  (0.3 mmol, 41.5 mg) and MeI (0.5 mmol, 31  $\mu$ L) in acetone (2 mL) at room temperature for 1 h. The solvent was removed under vacuum and purification was performed as described in the general procedure to afford a mixture of **3ba/3ba-d**. The KIE value was determined to be  $k_H/k_D = 2.46$  on the basis of  $^1\text{H}$  NMR analysis.

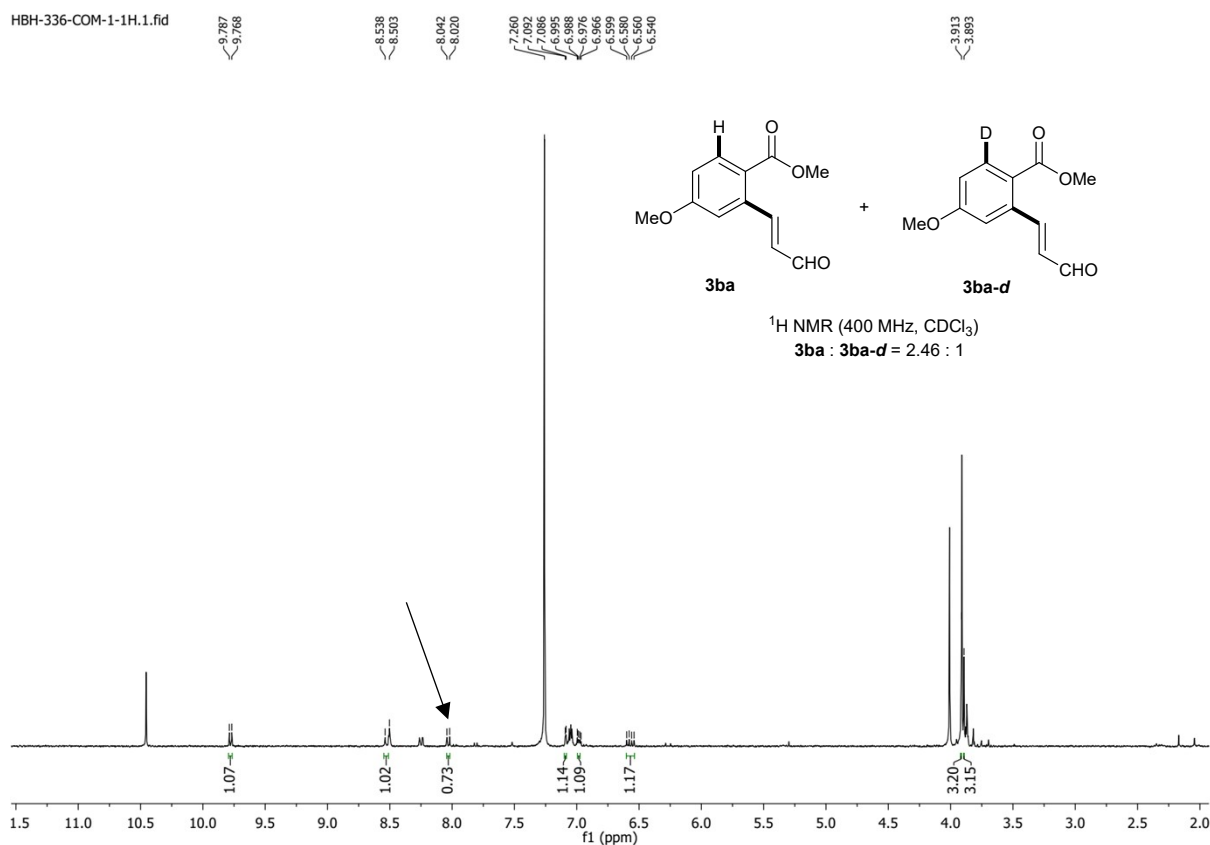

### For C-H Alkylation

**Parallel Experiment** 4-Methoxybenzoic acid (**1b** (15.2 mg) or **1b-d<sub>2</sub>** [91% D] (15.4 mg), 0.1 mmol), MBH alcohol **2b** (0.11 mmol, 21 mg), Pd(OAc)<sub>2</sub> (10 mol %, 0.01 mmol, 2.3 mg) and Ag<sub>2</sub>CO<sub>3</sub> (0.2 mmol, 55 mg) were stirred in TFE (1 mL) at 110 °C (in a pre-heated oil bath) in a sealed tube for 2 h. The reaction mixture was cooled to room temperature, diluted with EtOAc (10 mL) and passed through a short celite pad. Evaporation of the solvent gave a residue that was stirred with K<sub>2</sub>CO<sub>3</sub> (0.3 mmol, 41.5 mg) and MeI (0.5 mmol, 31 μL) in acetone (2 mL) at room temperature for 1 h. The solvent was removed under vacuum and purification was performed as described in the general procedure to afford **4bb** and **4bb-d**. The KIE value was determined to be  $k_H/k_D = 2.56$  on the basis of <sup>1</sup>H NMR analysis.

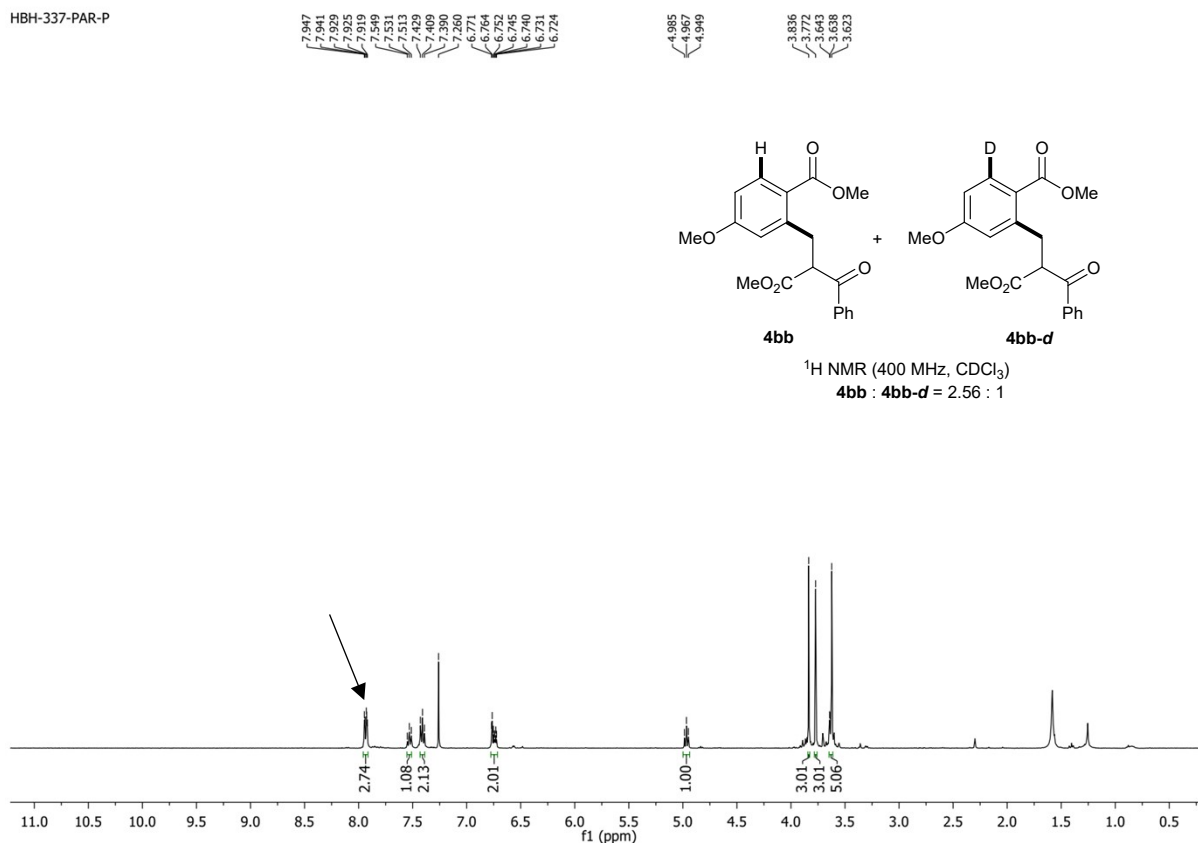

### For C-H Alkylation

**Competitive Experiment:** 4-Methoxybenzoic acid **1b** (0.05 mmol, 7.6 mg), 4-methoxybenzoic acid- $d_2$  **1b- $d_2$**  [91% D] (0.05 mmol, 7.7 mg), MBH alcohol **2a** (0.11 mmol, 21 mg), Pd(OAc)<sub>2</sub> (10 mol %, 0.01 mmol, 2.3 mg) and Ag<sub>2</sub>CO<sub>3</sub> (0.2 mmol, 55 mg) were stirred in TFE (1 mL) at 110 °C (in a pre-heated oil bath) in a sealed tube for 2 h. The reaction mixture was cooled to room temperature, diluted with EtOAc (20 mL) and passed through a short celite pad. Evaporation of the solvent gave a residue that was stirred with K<sub>2</sub>CO<sub>3</sub> (0.3 mmol, 41.5 mg) and MeI (0.5 mmol, 31 μL) in acetone (2 mL) at room temperature for 1 h. The solvent was removed under vacuum and purification was performed as described in the general procedure to afford a mixture of **4bb/4bb- $d$** . The KIE value was determined to be  $k_H/k_D = 2.12$  on the basis of <sup>1</sup>H NMR analysis.



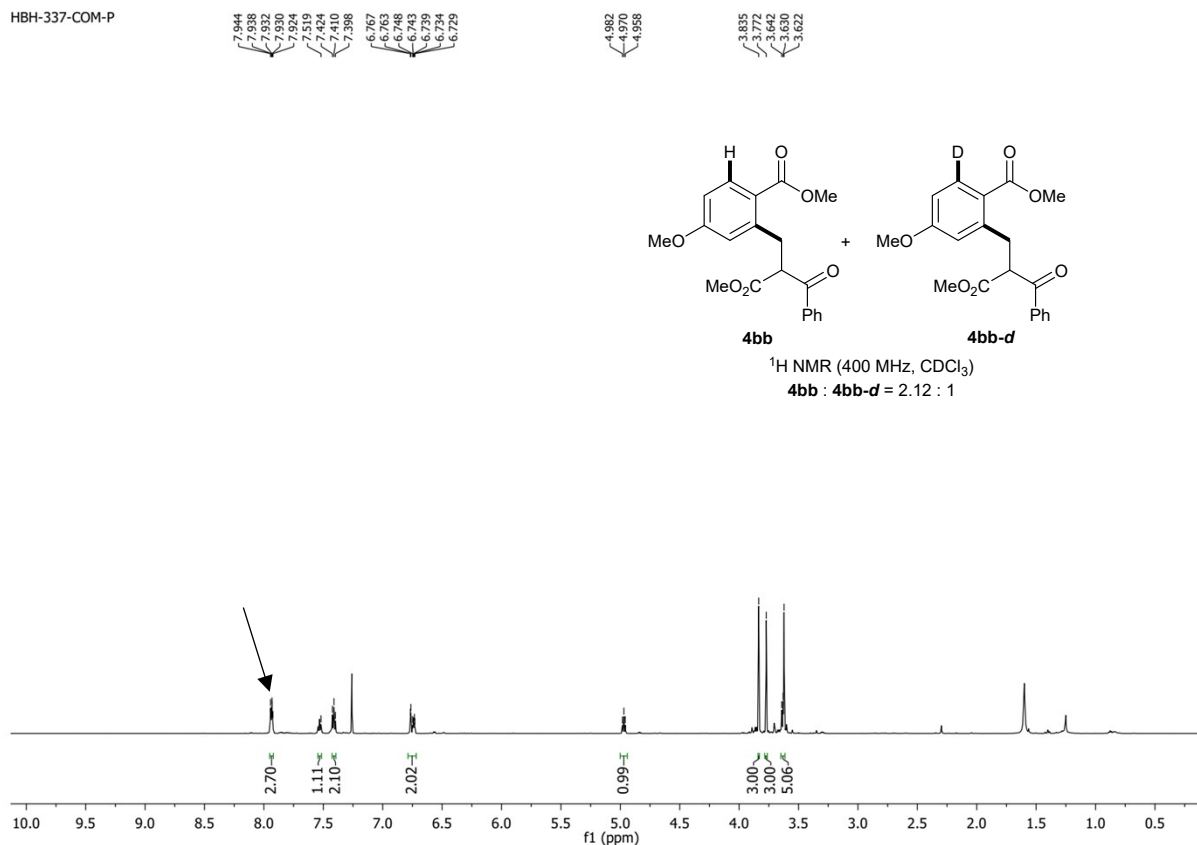

### Control Experiment (1)

**For C-H Alkenylation:** 4-Methoxybenzoic acid **1b** (0.1 mmol, 15.2 mg, 1.0 equiv), prop-2-en-1-ol **2p** (0.11 mmol, 6.4 mg, 1.1 equiv), Pd(OAc)<sub>2</sub> (0.01 mmol, 2.3 mg, 0.1 equiv), Ag<sub>2</sub>CO<sub>3</sub> (0.2 mmol, 55 mg, 2.0 equiv) and 1,4-benzoquinone (0.1 mmol, 11 mg, 1.0 equiv) were stirred in HFIP (1 mL) at 110 °C (in a pre-heated oil bath) in a sealed tube for 12 h. The reaction mixture was cooled to room temperature, diluted with EtOAc (20 mL) and passed through a short celite pad. Evaporation of the solvent gave a residue that was stirred with K<sub>2</sub>CO<sub>3</sub> (0.3 mmol, 41.5 mg, 3.0 equiv) and MeI (0.5 mmol, 31 μL, 5.0 equiv) in acetone (2 mL) at room temperature for 3 h. The formation of **3ba** was not observed.

**For C-H Alkylation:** 4-Methoxybenzoic acid **1b** (0.1 mmol, 15.2 mg, 1.0 equiv), 1-phenylprop-2-en-1-ol **2q** (0.11 mmol, 14.8 mg, 1.1 equiv), Pd(OAc)<sub>2</sub> (0.01 mmol, 2.3 mg, 0.1 equiv) and Ag<sub>2</sub>CO<sub>3</sub> (0.2 mmol, 55 mg, 2.0 equiv) were stirred in TFE (1 mL) at 110 °C (in a pre-heated oil bath) in a sealed tube for 12 h. The reaction mixture was cooled to room temperature, diluted with EtOAc (20 mL) and passed through a short celite pad. Evaporation of the solvent gave a residue that was stirred with K<sub>2</sub>CO<sub>3</sub> (0.3 mmol, 41.5 mg, 3.0 equiv) and

MeI (0.5 mmol, 31  $\mu$ L, 5.0 equiv) in acetone (2 mL) at room temperature for 3 h. The formation of **4bq** was not observed.

This outcome highlights that the ester moiety plays an essential role of in the reaction by aiding the migratory insertion step in the catalytic cycle.

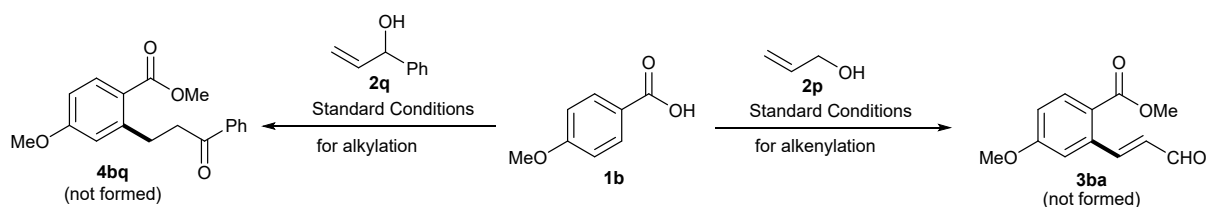

### Control Experiment (2)

**For C-H Alkenylation:** Methyl 4-methoxybenzoate **1b'** (0.1 mmol, 16.6 mg, 1.0 equiv), methyl 2-(hydroxymethyl)acrylate **2a** (0.11 mmol, 12.8 mg, 1.1 equiv), Pd(OAc)<sub>2</sub> (0.01 mmol, 2.3 mg, 0.1 equiv), Ag<sub>2</sub>CO<sub>3</sub> (0.2 mmol, 55 mg, 2.0 equiv) and 1,4-benzoquinone (0.1 mmol, 11 mg, 1.0 equiv) were stirred in HFIP (1 mL) at 110 °C (in a pre-heated oil bath) in a sealed tube for 12 h. The formation of **3ba** was not observed.

**For C-H Alkylation:** Methyl 4-methoxybenzoate **1b'** (0.1 mmol, 16.6 mg, 1.0 equiv), methyl 2-(hydroxy(phenyl)methyl)acrylate **2b** (0.11 mmol, 21 mg, 1.1 equiv), Pd(OAc)<sub>2</sub> (0.01 mmol, 2.3 mg, 0.1 equiv) and Ag<sub>2</sub>CO<sub>3</sub> (0.2 mmol, 55 mg, 2.0 equiv) were stirred in TFE (1 mL) at 110 °C (in a pre-heated oil bath) in a sealed tube for 12 h. The formation of **4bb** was not observed.

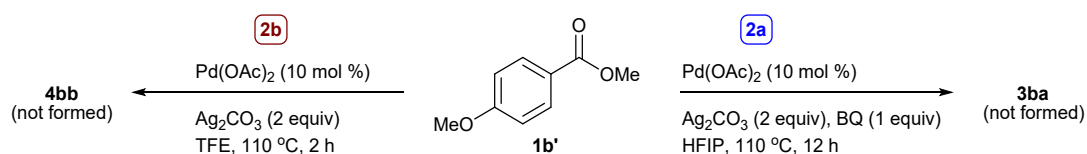

### Control Experiment (3)

4-Methylbenzoic acid **1a** (0.1 mmol, 13.6 mg, 1.0 equiv), methyl 2-benzoylacrylate **2b'** (0.11 mmol, 21mg, 1.1 equiv), Pd(OAc)<sub>2</sub> (0.01 mmol, 2.3 mg, 0.1 equiv) and Ag<sub>2</sub>CO<sub>3</sub> (0.2 mmol, 55 mg, 2.0 equiv) were stirred in TFE (1 mL) at 110 °C (in a pre-heated oil bath) in a sealed tube for 12 h. The formation of alkylated **4ab** was not formed.

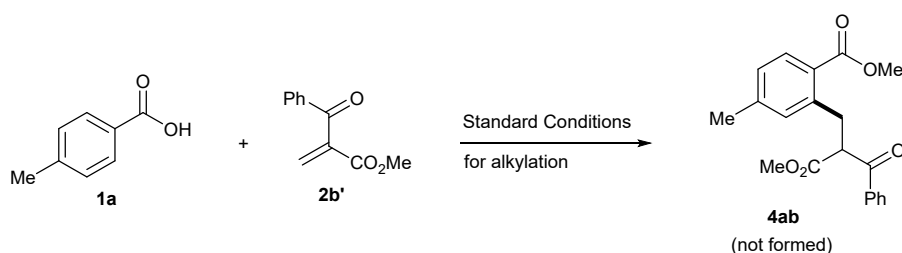

#### Control Experiment (4)

4-Methylbenzoic acid **1a** (0.1 mmol, 13.6 mg, 1.0 equiv), methyl 2-(hydroxy(phenyl)methyl-*d*) acrylate **2b-d<sub>1</sub>** (0.11 mmol, 21.2 mg, 1.1 equiv), Pd(OAc)<sub>2</sub> (0.01 mmol, 2.3 mg, 0.1 equiv) and Ag<sub>2</sub>CO<sub>3</sub> (0.2 mmol, 55 mg, 2.0 equiv) were stirred in TFE (1 mL) at 110 °C (in a pre-heated oil bath) in a sealed tube for 12 h. In the isolated alkylated product **4ab**, no deuteration incorporation was observed.

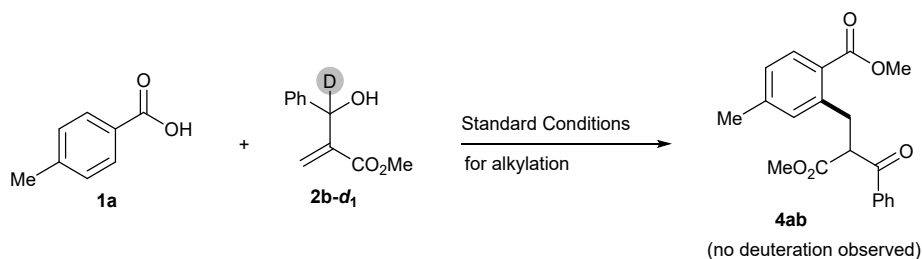

**Determination of CO<sub>2</sub> Evolution using GC Analysis.** 4-Methylbenzoic acid **1a** (2.0 mmol, 272 mg, 1.0 equiv), methyl 2-(hydroxymethyl)acrylate **2a** (2.2 mmol, 255 mg, 1.1 equiv), Pd(OAc)<sub>2</sub> (0.2 mmol, 45 mg, 0.1 equiv), Ag<sub>2</sub>CO<sub>3</sub> (4 mmol, 1.1 g, 2.0 equiv) and 1,4-benzoquinone (2 mmol, 216 mg, 1.0 equiv) were stirred in HFIP (5 mL) at 110 °C (in a pre-heated oil bath) in a sealed tube for 12 h. The pressure tube was cooled to 0 °C, the evolved gas was syringed out and detected by PerkinElmer clarus590 GC instrument using Elite Plot-Q column (30 m length x 530 μm x 20 μm ID) with the following conditions:

TCD starting temperature: 40 °C

Oven temperature: 60 °C

Time at starting temperature: 0 min

Hold time: 5 min

Ramp: 28 °C/ min up to 200 °C

Flow rate: 5 ml/ min (N<sub>2</sub>)

Split ration: 20

Inlet temperature: 40 °C

Detector temperature TCD: 200 °C

## Gas Chromatograms:

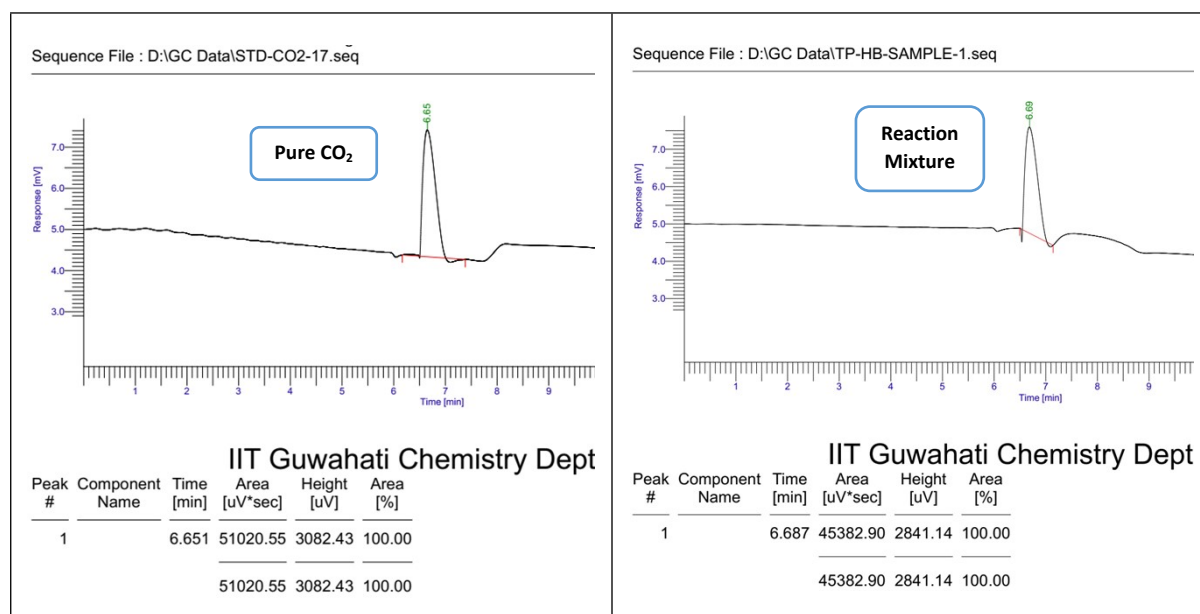

## References

- Bhattacharyya, H.; Saha, S.; Verma, K.; Punniyamurthy, T. Redox-Neutral Site-Selective C–H Allylation and Iodolactonization of Benzoic Acids Using Morita-Baylis-Hillman Adducts in Water. *Org. Lett.* **2023**, *25*, 6830.
- Xu, X.; Li, R.-P.; Zhang, Z.; Gong, X.; Zheng, Y.; Tang, S. Regioselective Synthesis of Multisubstituted 2,3-Dihydrooxazoles by 1,3-Dithiane Umpolung. *Org. Lett.* **2024**, *26*, 6825.
- Zhang, J.; Loh, T.-P. Ruthenium- and Rhodium-Catalyzed Cross-Coupling Reaction of Acrylamides with Alkenes: Efficient Access to (Z,E)-Dienamides. *Chem. Commun.* **2012**, *48*, 11232.
- Latorre, A.; Sáez, J. A.; Rodríguez, S.; González, F. V. Study of the Stereoselectivity of the Nucleophilic Epoxidation of 3-Hydroxy-2-Methylene Esters. *Tetrahedron* **2014**, *70*, 97.
- Santhosh Reddy, R.; Lagishetti, C.; Kiran, I. N. C.; You, H.; He, Y. Transition-Metal-Free Cascade Synthesis of 4-Quinolones: Umpolung of Michael Acceptors *via* Ene Reaction with Arynes. *Org. Lett.* **2016**, *18*, 3818.
- Zhu, B.; Yan, L.; Pan, Y.; Lee, R.; Liu, H.; Han, Z.; Huang, K.-W.; Tan, C.-H.; Jiang, Z. Lewis Base Catalyzed Enantioselective Allylic Hydroxylation of Morita-Baylis-Hillman Carbonates with Water. *J. Org. Chem.* **2011**, *76*, 6894.

7. Bouzide, A. Magnesium Bromide Mediated Highly Diastereoselective Heterogeneous Hydrogenation of Olefins. *Org. Lett.* **2002**, *4*, 1347.
8. Schmidt, Y.; Breit, B. Stereoselective and Diversity-oriented Synthesis of Trisubstituted Allylic Alcohols and Amines. *Chem.-Eur. J.* **2011**, *17*, 11789.
9. Dočekal, V.; Šimek, M.; Dračinský, M.; Veselý, J. Decarboxylative Organocatalytic Allylic Amination of Morita-Baylis-Hillman Carbamates. *Chem.-Eur. J.* **2018**, *24*, 13441.
10. Sekiguchi, Y.; Yoshikai, N. Zinc-Catalyzed  $\beta$ -Functionalization of Cyclopropanols via Enolized Homoenate. *J. Am. Chem. Soc.* **2021**, *143*, 18400.
11. Basavaiah, D.; Gowriswari, V. V. L.; Sarma, P. K. S.; Dharma Rao, P. Chiral Acrylates as Substrates in Baylis-Hillman Reaction. *Tetrahedron Lett.* **1990**, *31*, 1621.
12. Tomita, D.; Wada, R.; Kanai, M.; Shibasaki, M. Enantioselective Alkenylation and Phenylation Catalyzed by a Chiral CuF Complex. *J. Am. Chem. Soc.* **2005**, *127*, 4138.
13. De Fusco, C.; Fuoco, T.; Croce, G.; Lattanzi, A. Noncovalent Organocatalytic Synthesis of Enantioenriched Terminal Aziridines with a Quaternary Stereogenic Center. *Org. Lett.* **2012**, *14*, 4078.
14. Müller, V.; Weck, R.; Derdau, V.; Ackermann, L. Ruthenium(II)-catalyzed Hydrogen Isotope Exchange of Pharmaceutical Drugs by C-H Deuteration and C-H Tritiation. *ChemCatChem* **2020**, *12*, 100.

# NMR (<sup>1</sup>H, <sup>13</sup>C and <sup>19</sup>F) Spectra

HBH-MB-OH-1H.1.fid  
HBH-MB-OH-1H

7.260 6.246 5.833 4.313 3.772 2.497

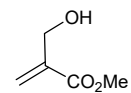

**2a**

<sup>1</sup>H NMR (400 MHz, CDCl<sub>3</sub>)

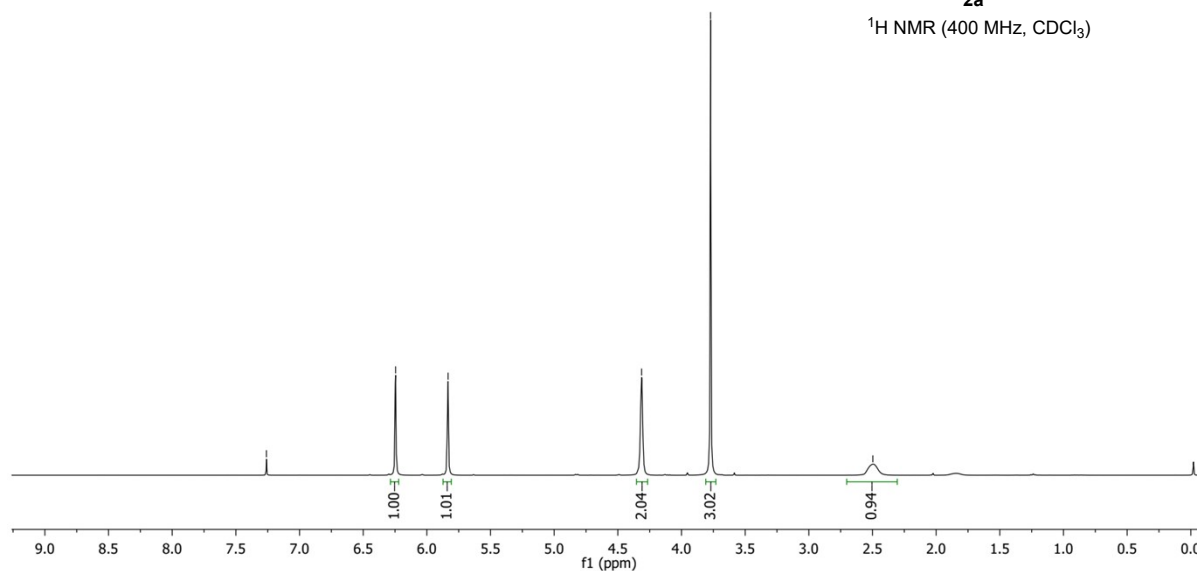

HBH-217-P-1H.1.fid

7.279 7.270 7.358 7.353 7.334 7.294 7.293 7.279 7.272 7.260 7.256 6.328 5.835 5.554 3.706 3.143 0.000

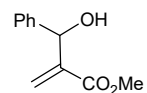

**2b**

<sup>1</sup>H NMR (400 MHz, CDCl<sub>3</sub>)

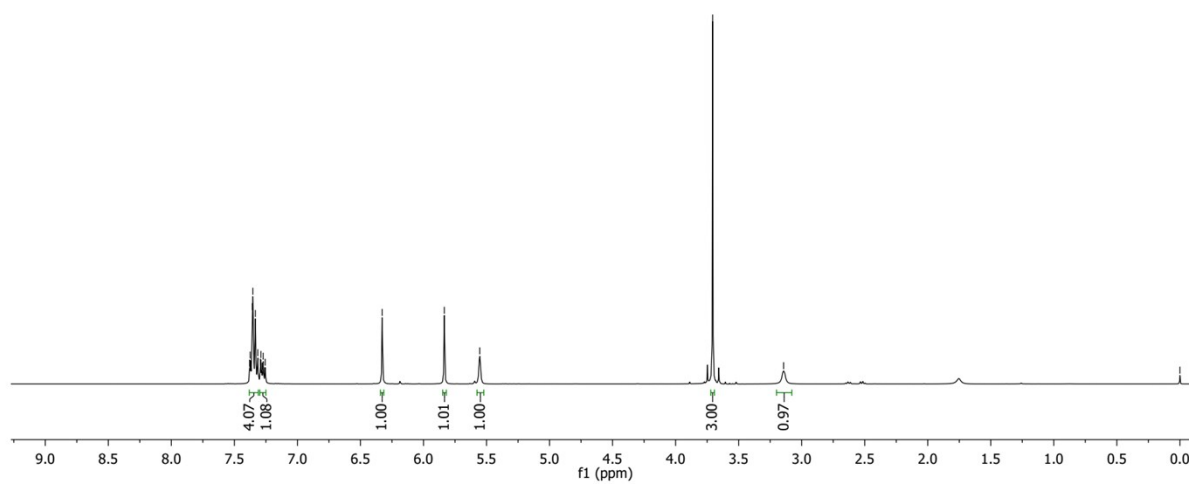

HBH-374-P-1H.1.fid

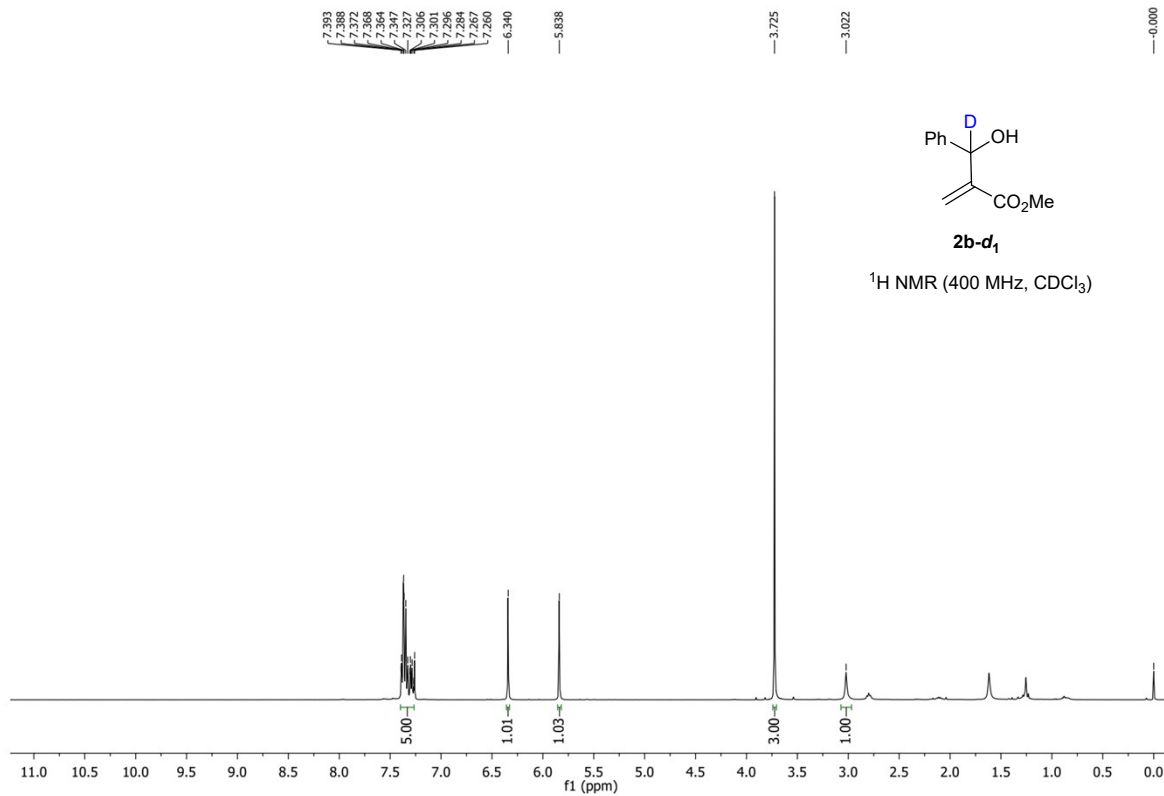

HBH-345-P-1H.1.fid

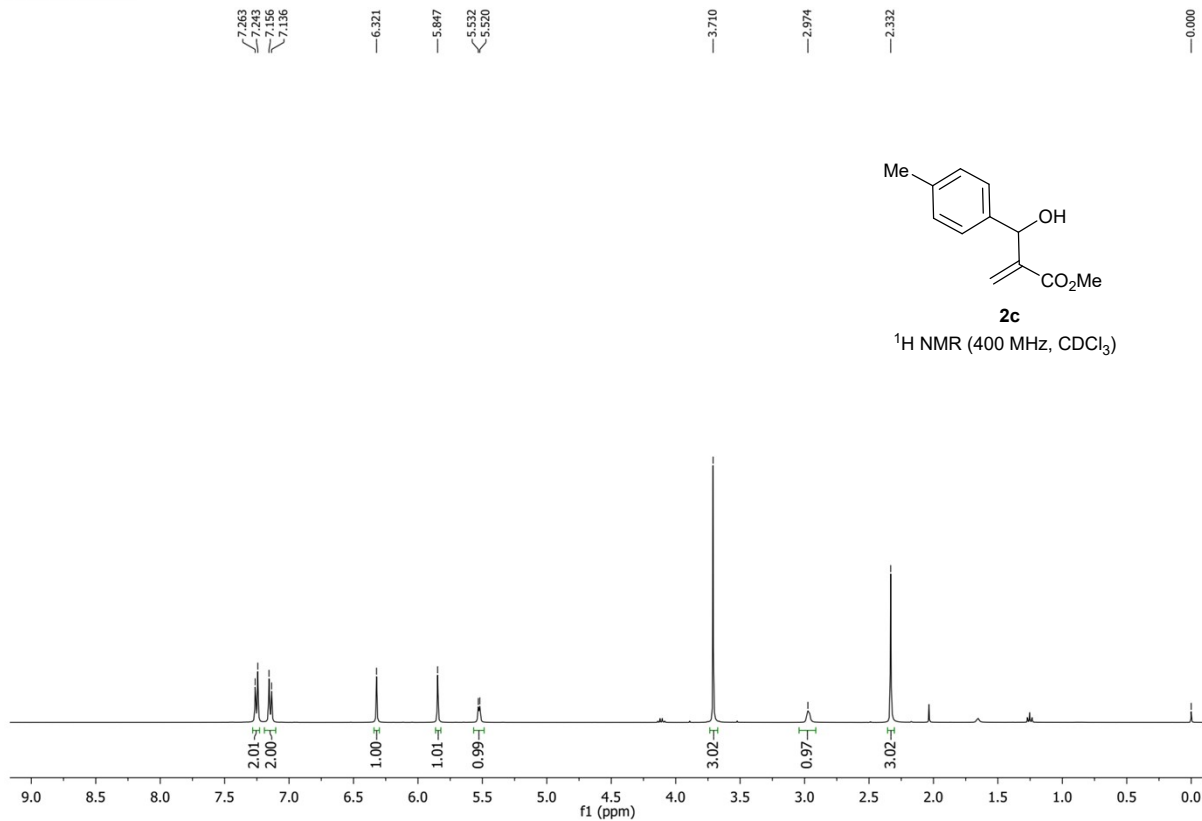

HBH-344-P-1H.1.fid

7.303  
7.260  
6.331  
5.826  
5.570  
5.509  
3.718  
3.173

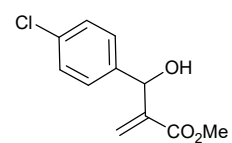

**2d**

<sup>1</sup>H NMR (400 MHz, CDCl<sub>3</sub>)

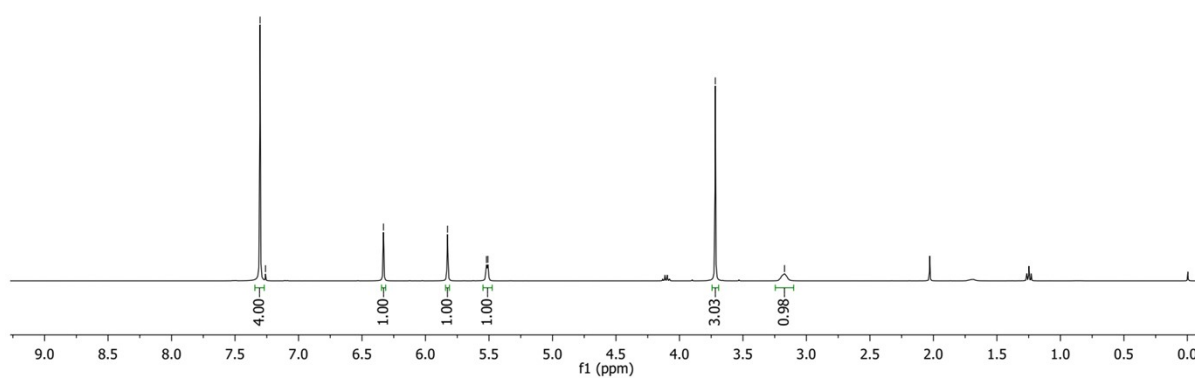

HBH-364-P-1H.1.fid

7.294  
7.275  
6.879  
6.857  
6.317  
5.880  
5.525  
5.516  
3.791  
3.712  
2.986  
2.976

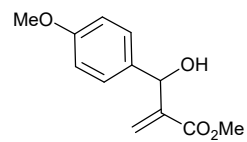

**2e**

<sup>1</sup>H NMR (400 MHz, CDCl<sub>3</sub>)

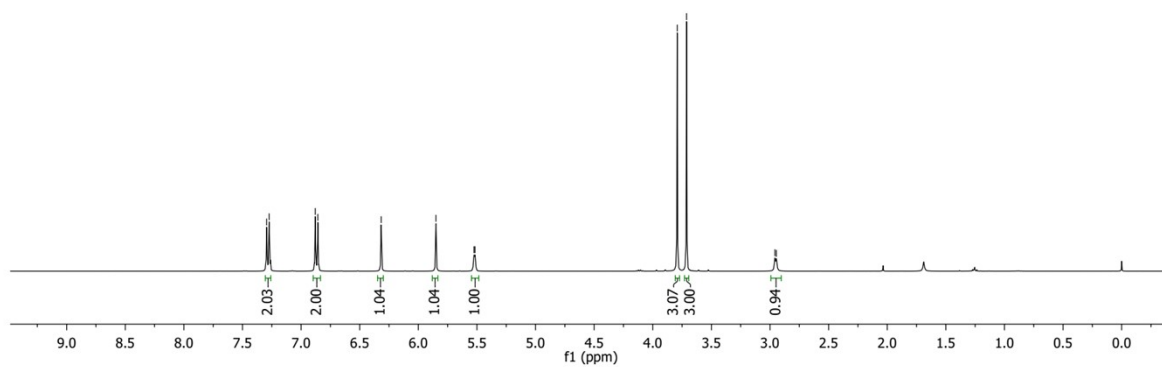



HBH-268-P-1H.1.fid

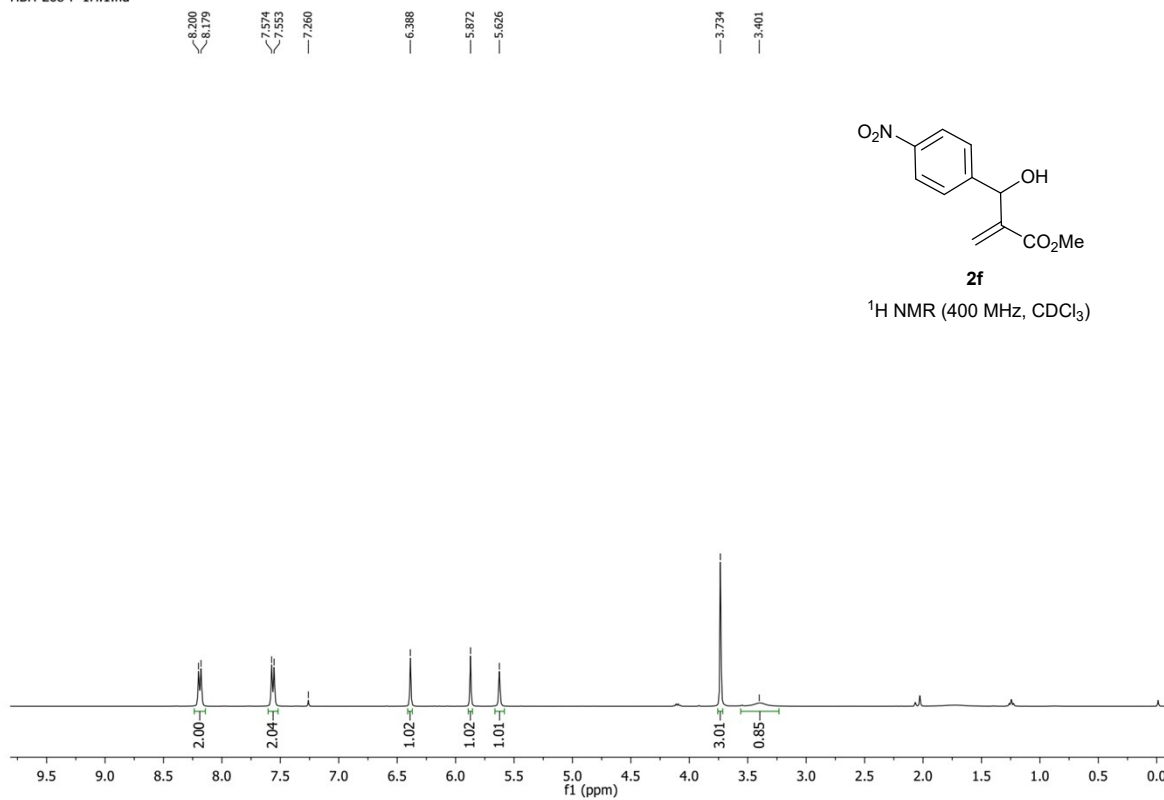

HBH-236-A-1H.1.fid

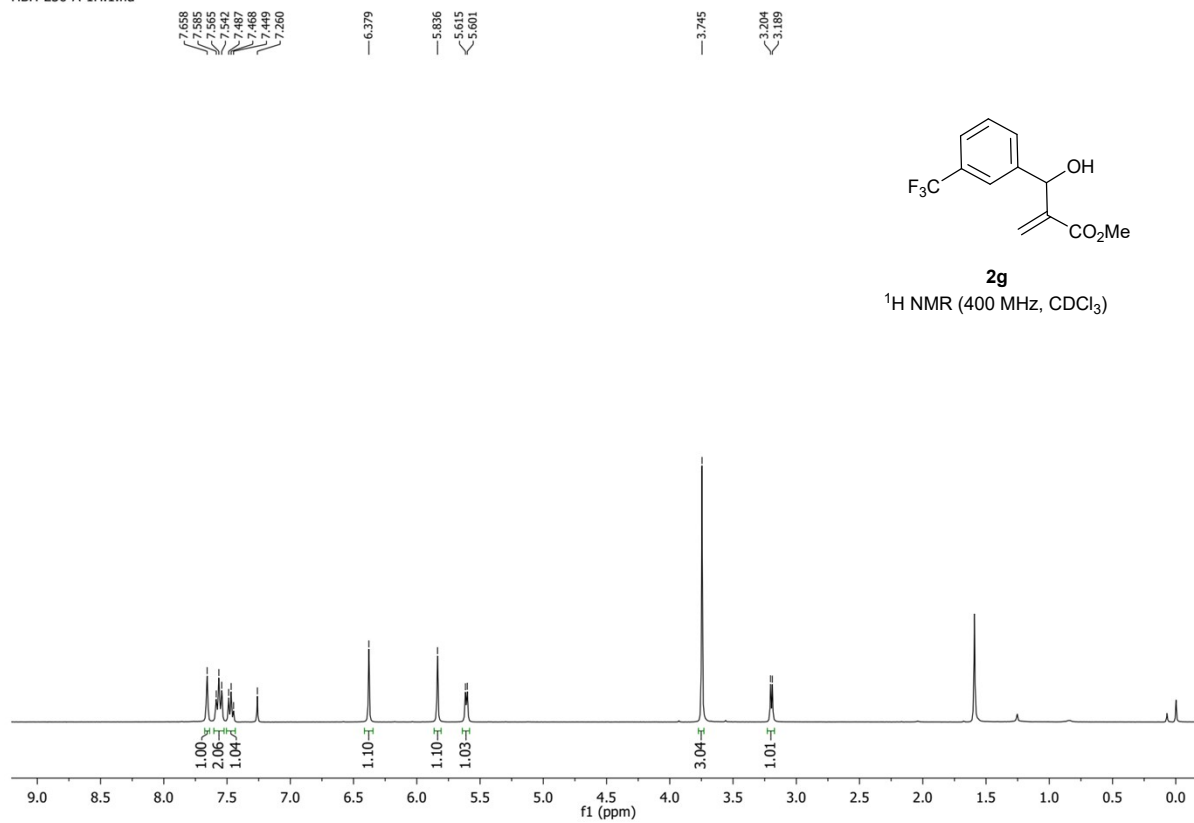

HBH-ISOMBH-1H

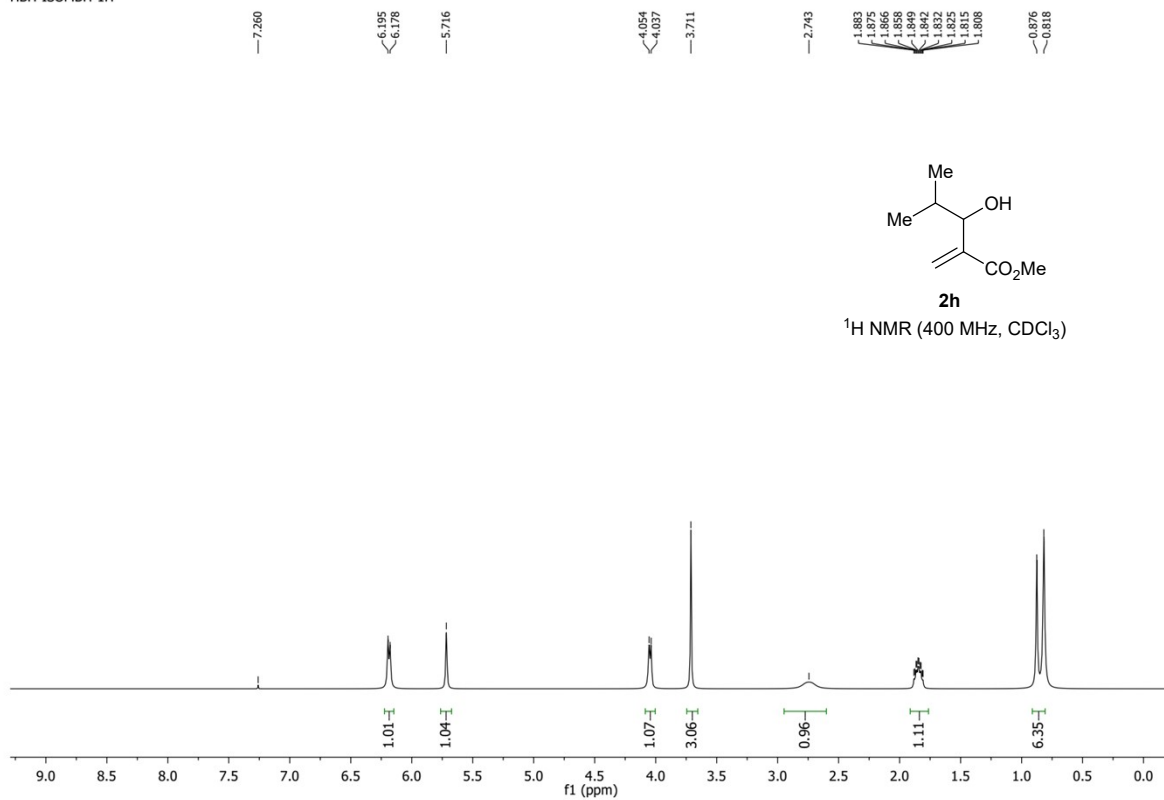

HBH-333-P-1H.1.fid

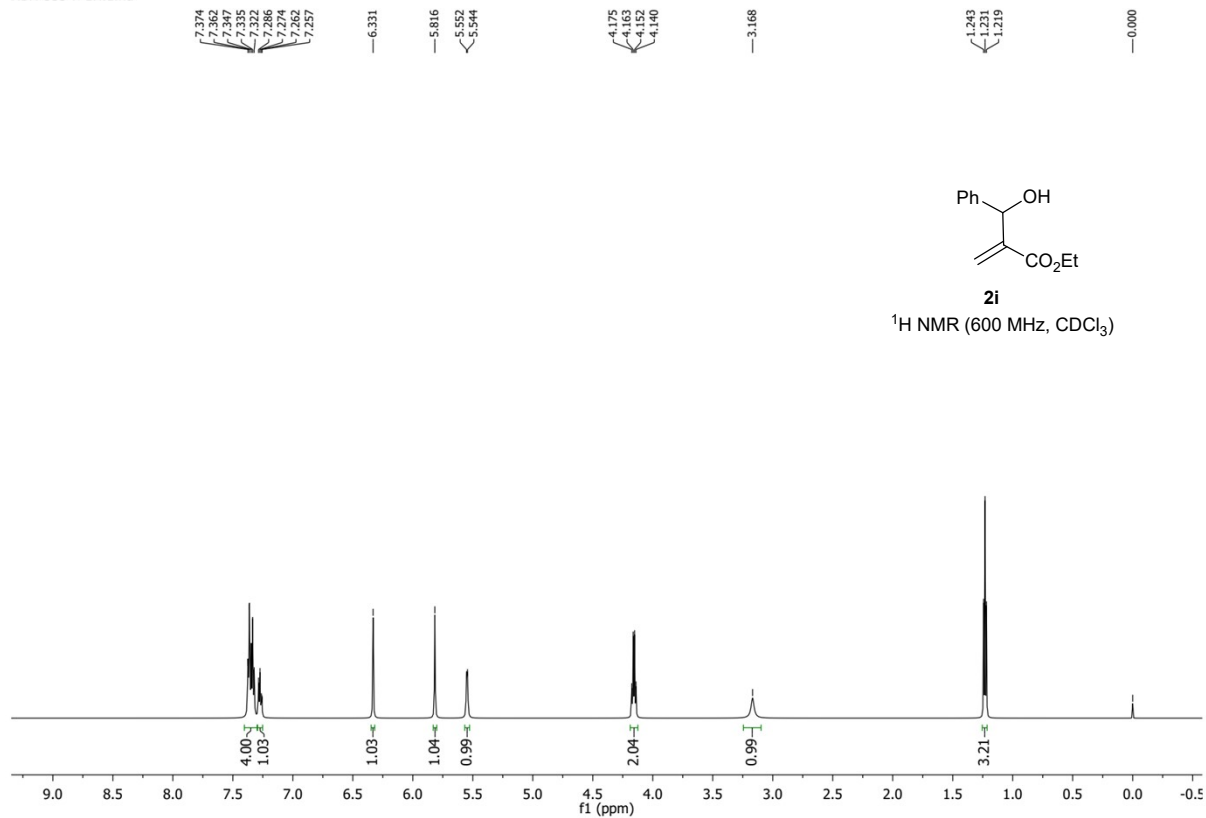

HBH-278-P\_1H.10.fid

7.349  
7.344  
7.337  
7.323  
7.305  
7.297  
7.292  
7.286  
7.279  
7.274  
7.268  
7.257  
7.249  
7.244  
7.235  
7.218  
7.214  
7.206  
7.201  
6.371  
5.889  
5.545  
5.140  
5.109  
5.105  
5.073  
3.128  
0.000

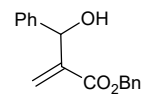

**2k**

<sup>1</sup>H NMR (400 MHz, CDCl<sub>3</sub>)

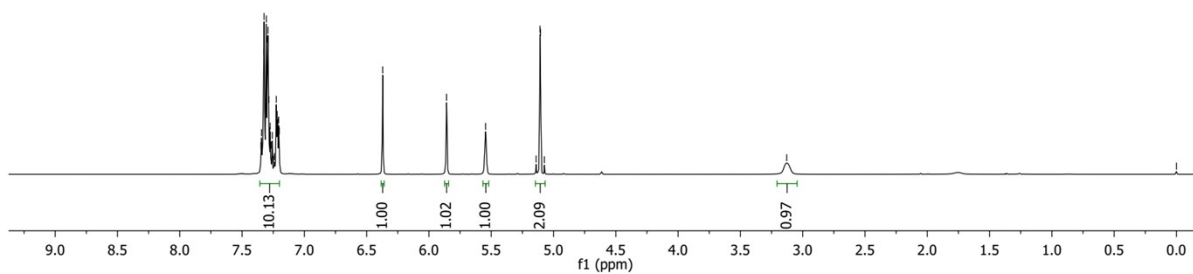

HBH-298-P-1H.1.fid

7.377  
7.372  
7.352  
7.346  
7.336  
7.292  
7.288  
7.282  
7.276  
7.271  
7.258  
7.250

6.251  
5.720  
5.502  
5.488

3.139  
3.124

1.393

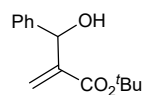

**2j**

<sup>1</sup>H NMR (400 MHz, CDCl<sub>3</sub>)

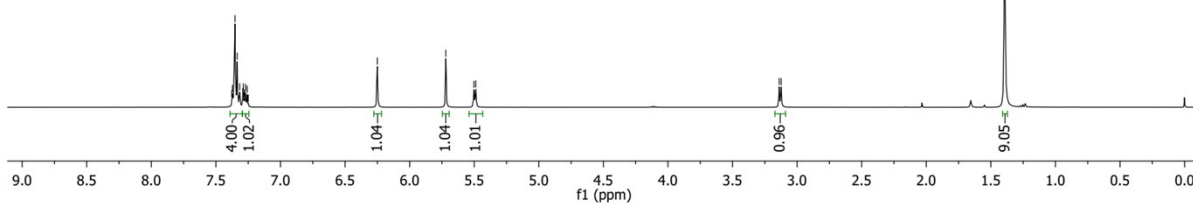

HBH-277-P\_1H.10.fid

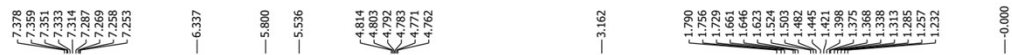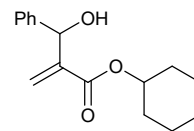

**2l**

<sup>1</sup>H NMR (400 MHz, CDCl<sub>3</sub>)

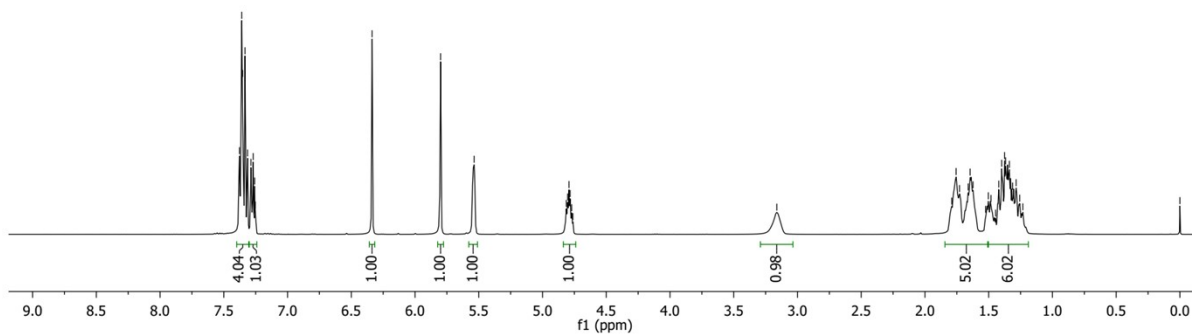

HBH-299-P-1H.1.fid

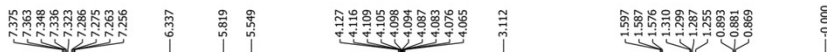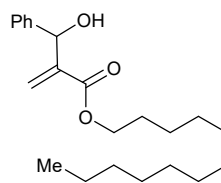

**2m**

<sup>1</sup>H NMR (600 MHz, CDCl<sub>3</sub>)

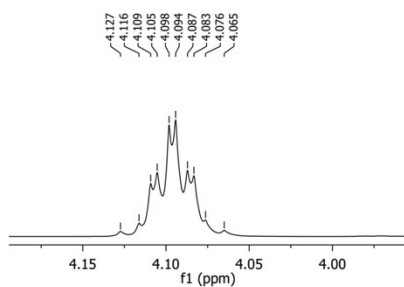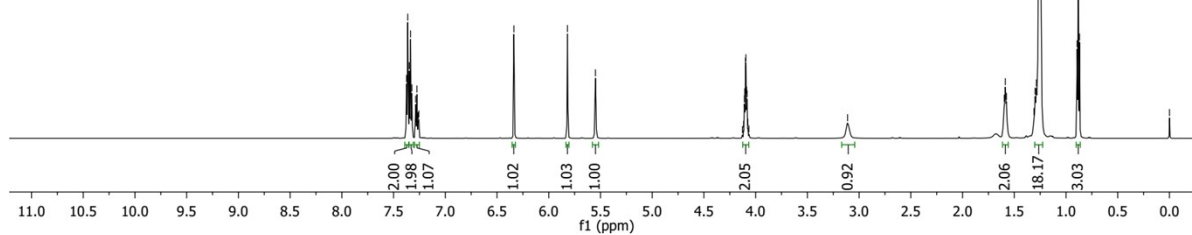

HBH-299-P-13C.3.fid

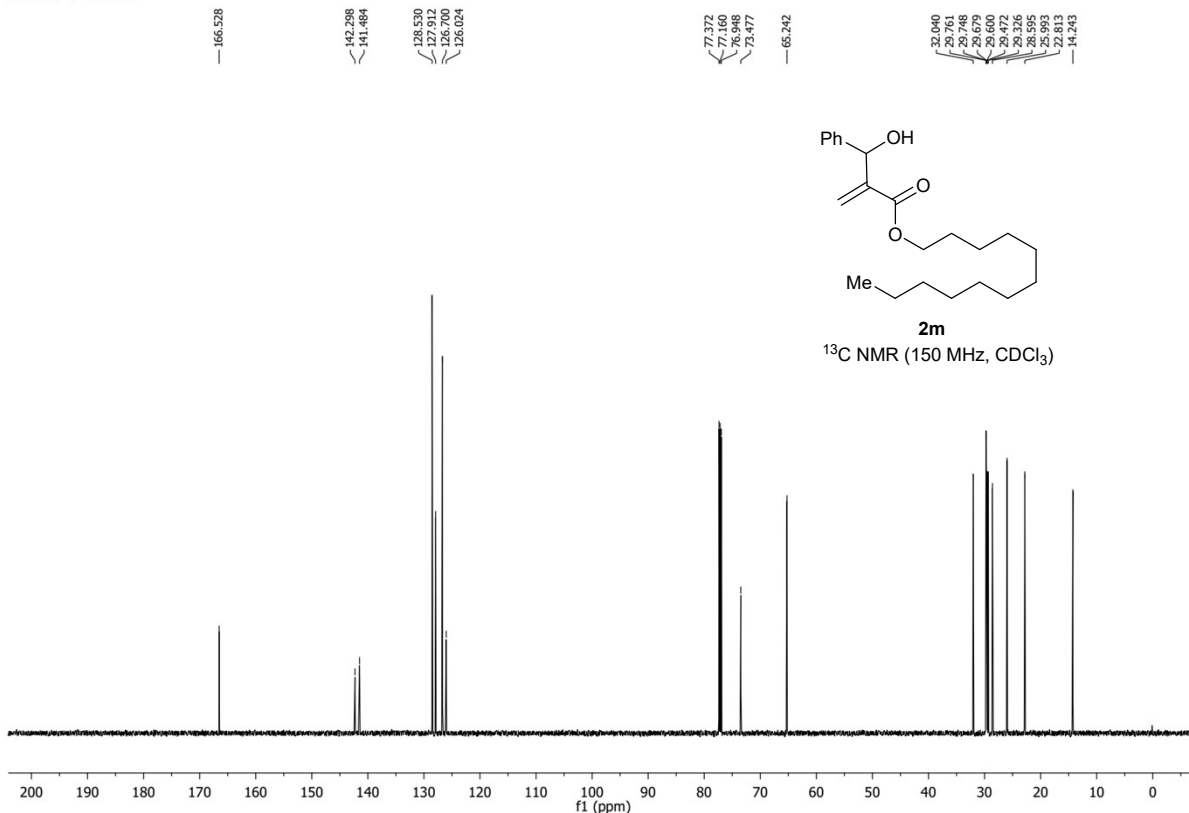

HBH-319-P\_1H.10.fid

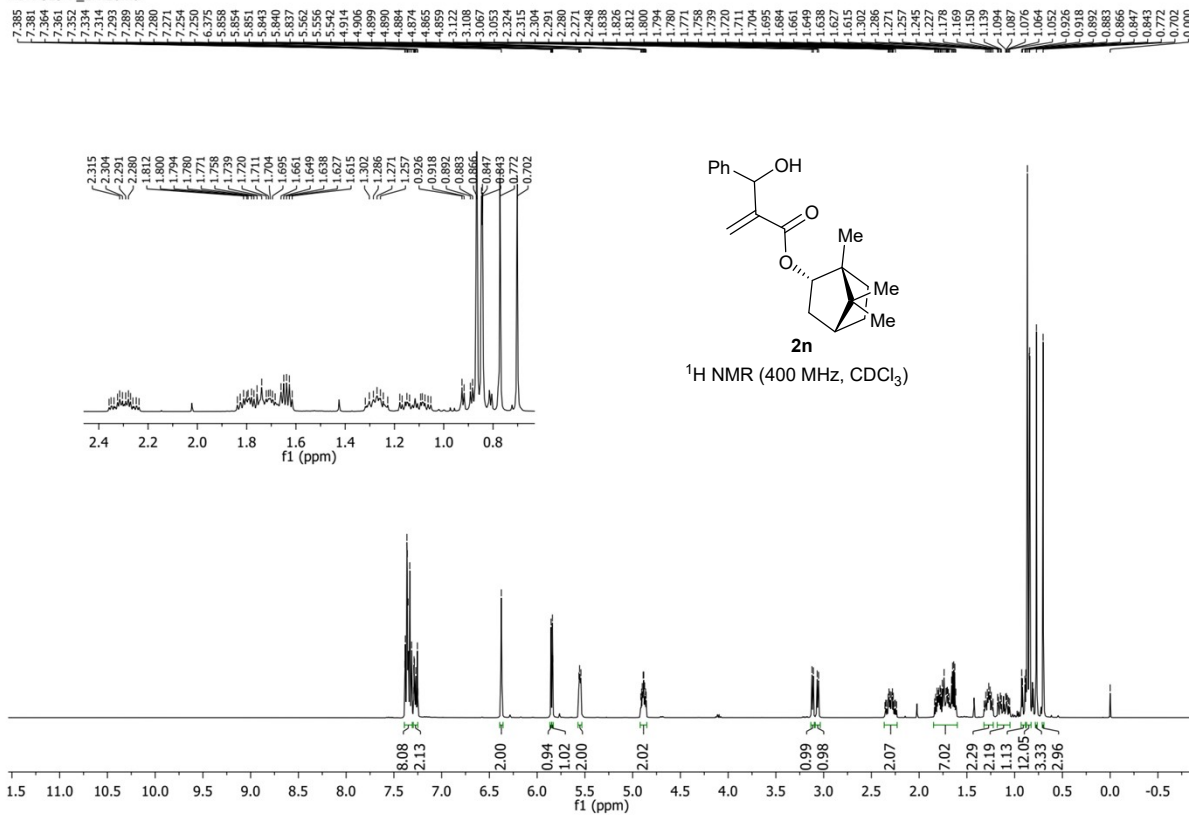

HBH-319-P\_13C.12.fid

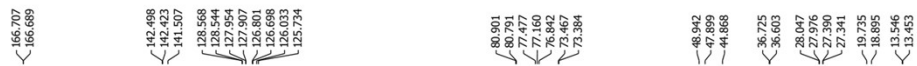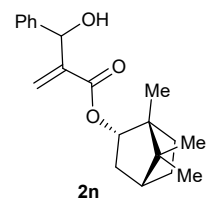

<sup>13</sup>C NMR (100 MHz, CDCl<sub>3</sub>)

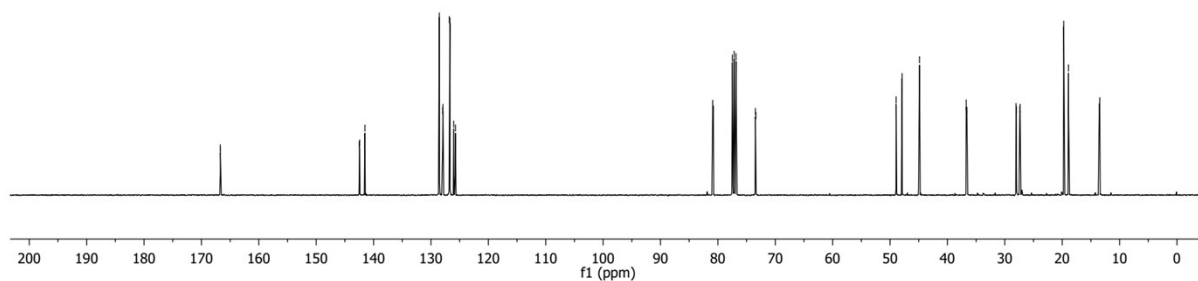

HBH-318-P-1-1H.1.fid

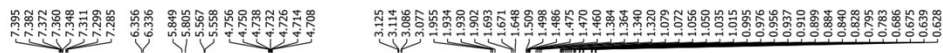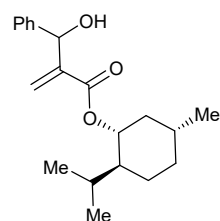

<sup>1</sup>H NMR (600 MHz, CDCl<sub>3</sub>)

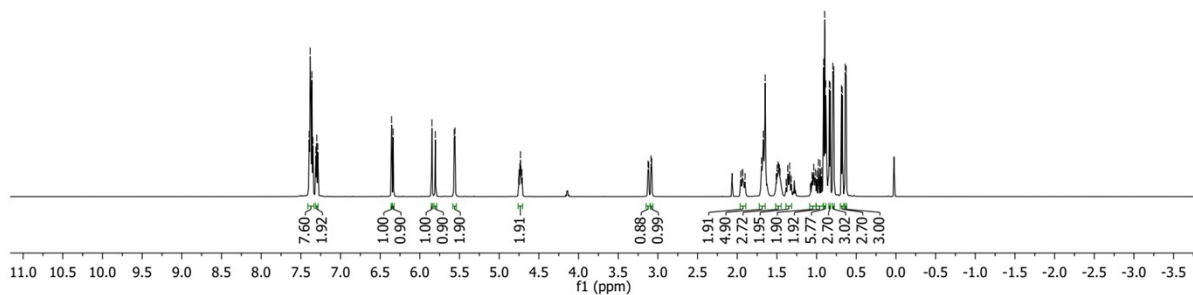

HBH-351-P-1H.1.fid

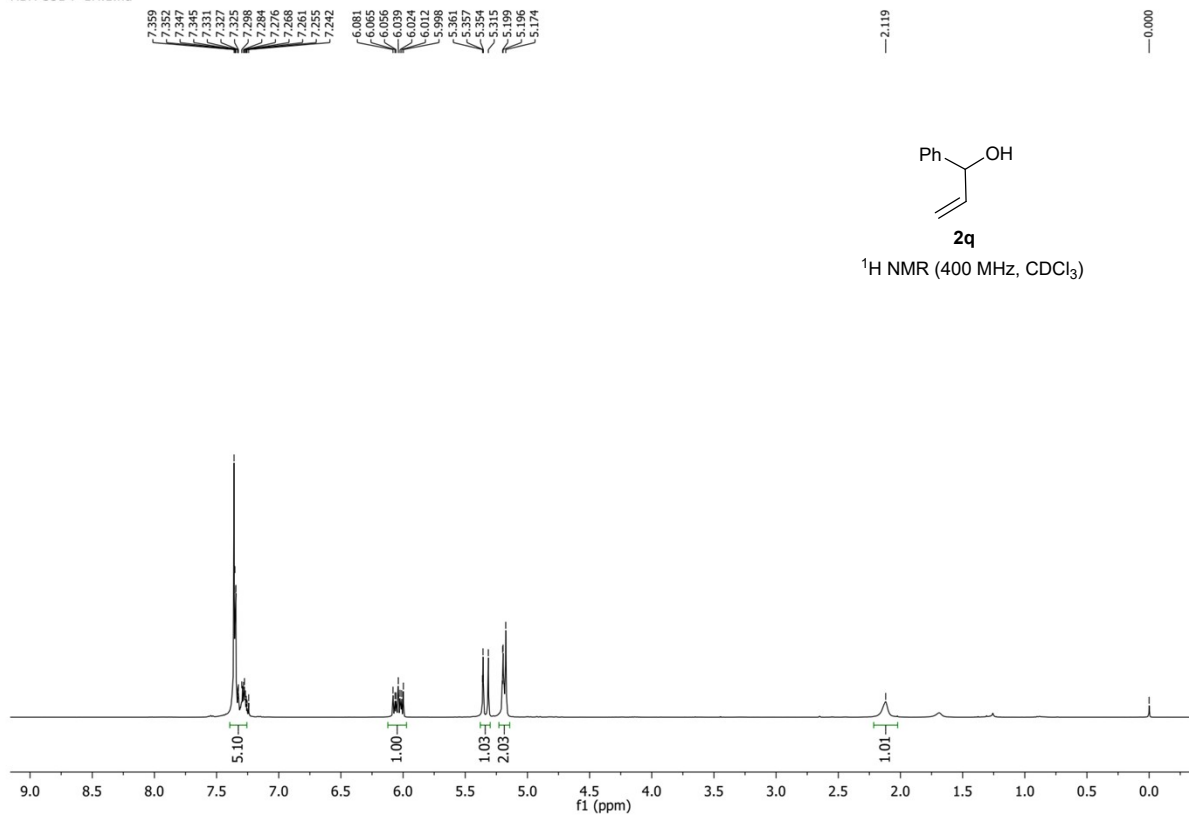

HBH-SJT-K-1H.1.fid

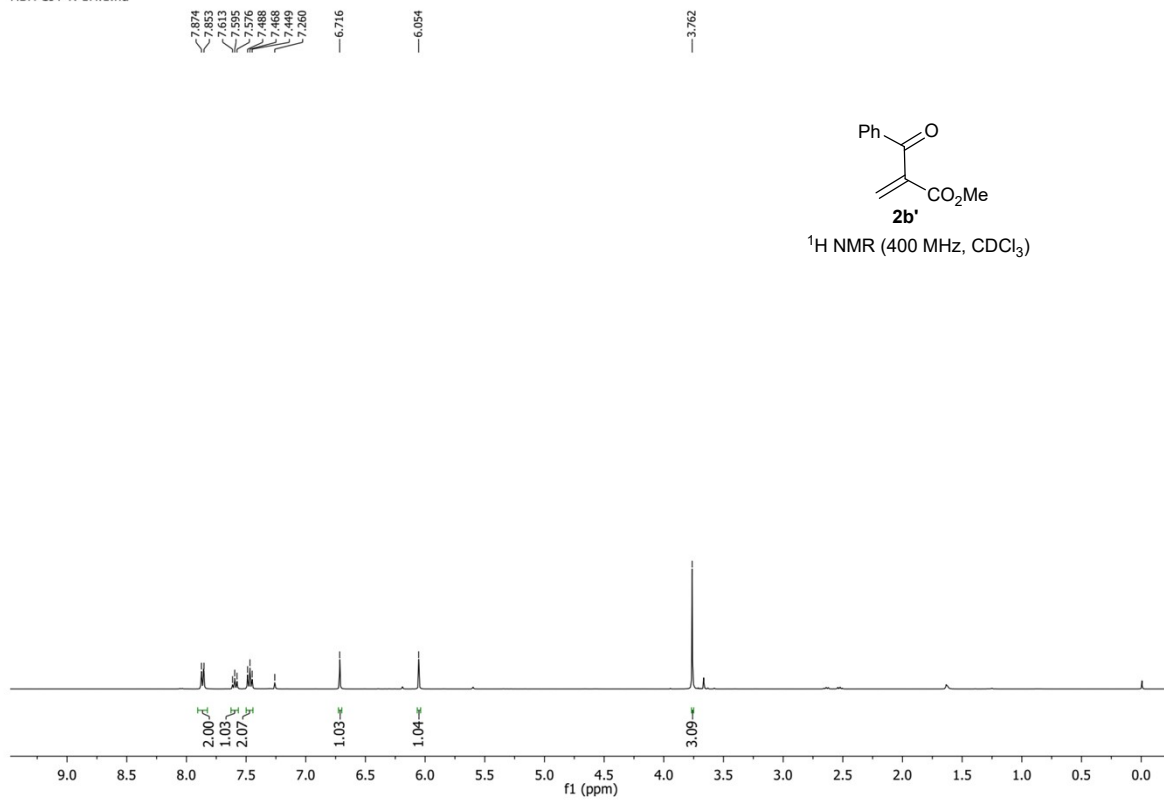

HBH-259-1H

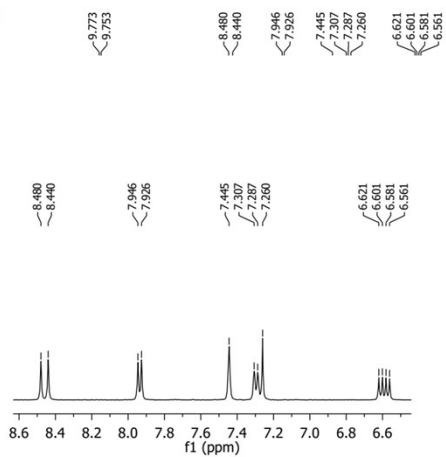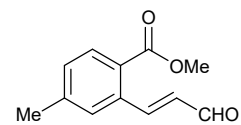

**3aa**

<sup>1</sup>H NMR (400 MHz, CDCl<sub>3</sub>)

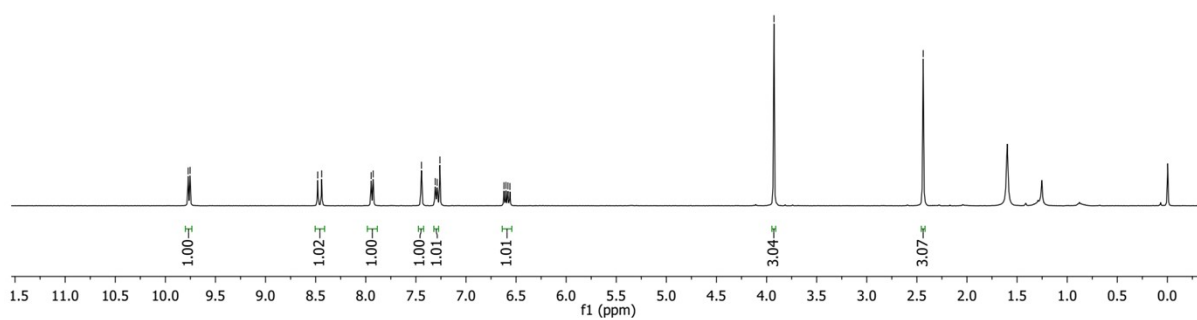

HBH-259-13C

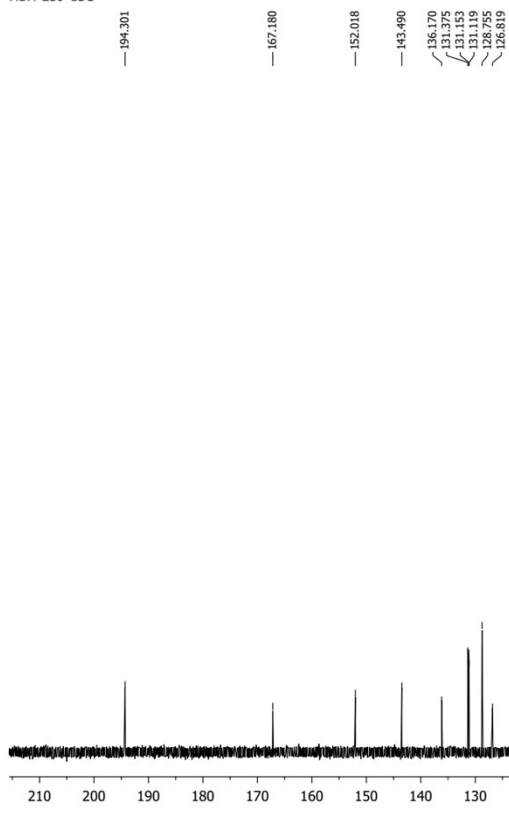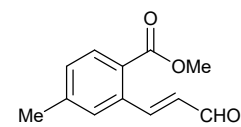

**3aa**

<sup>13</sup>C NMR (100 MHz, CDCl<sub>3</sub>)



HBH-269-P-1H.1.fid

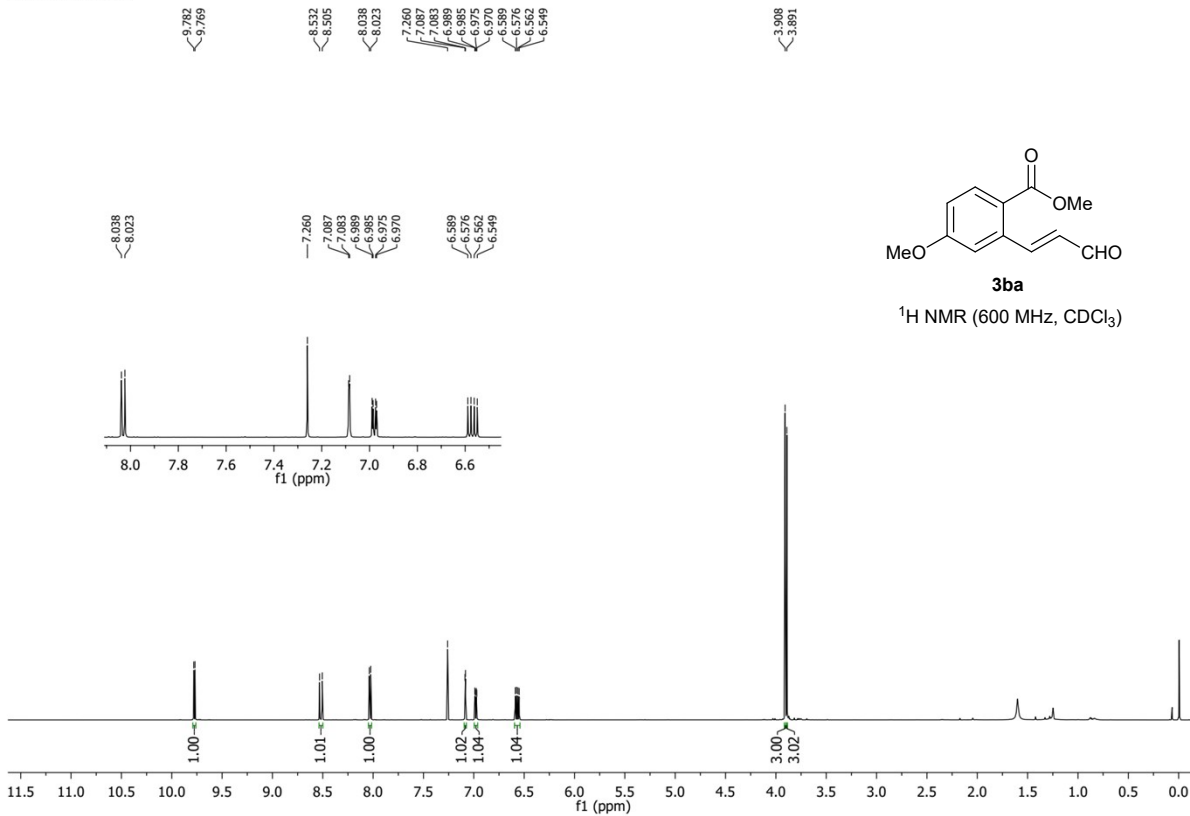

HBH-269-13C

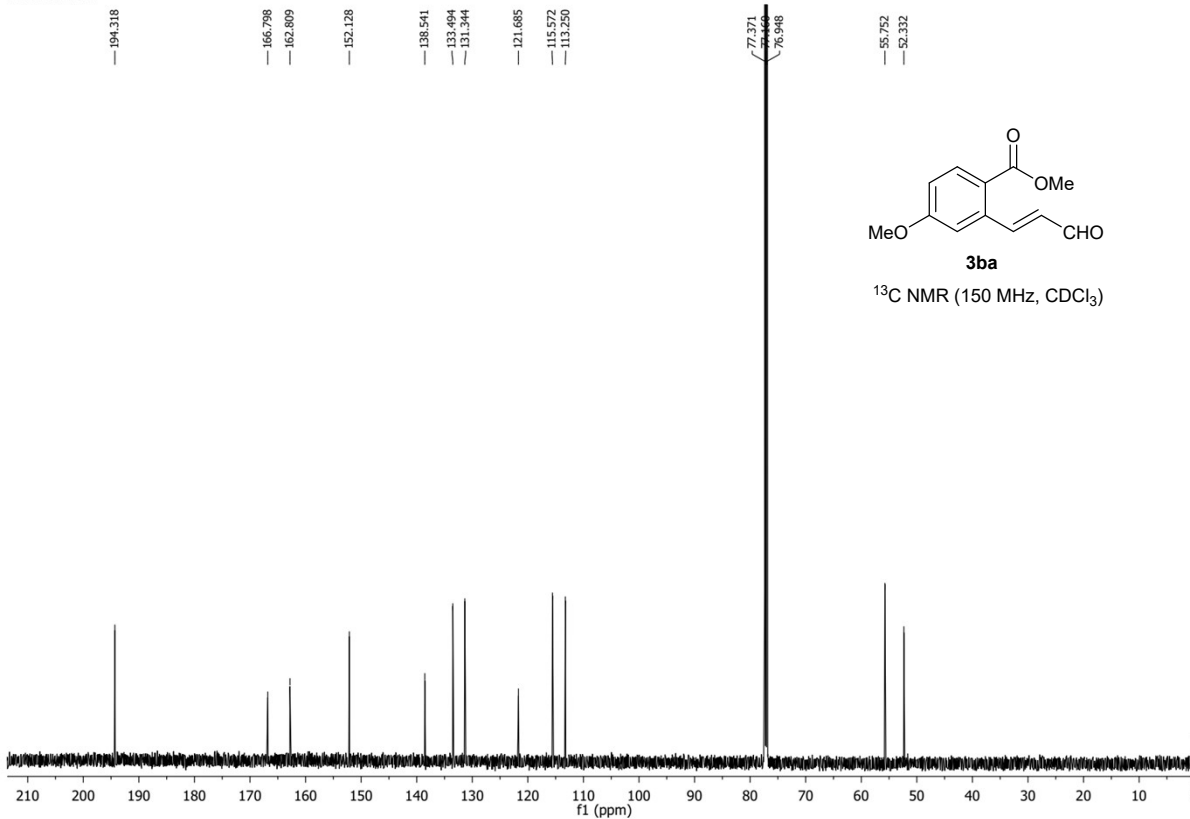

HBH-282-P-1H

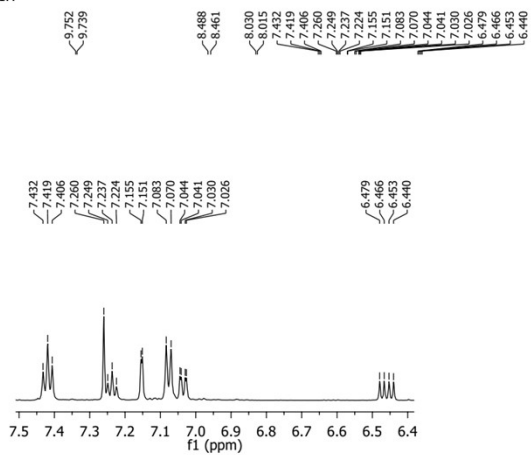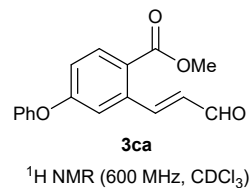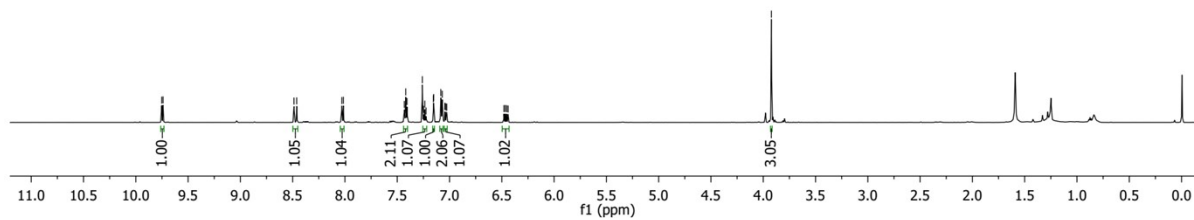

HBH-282-13C

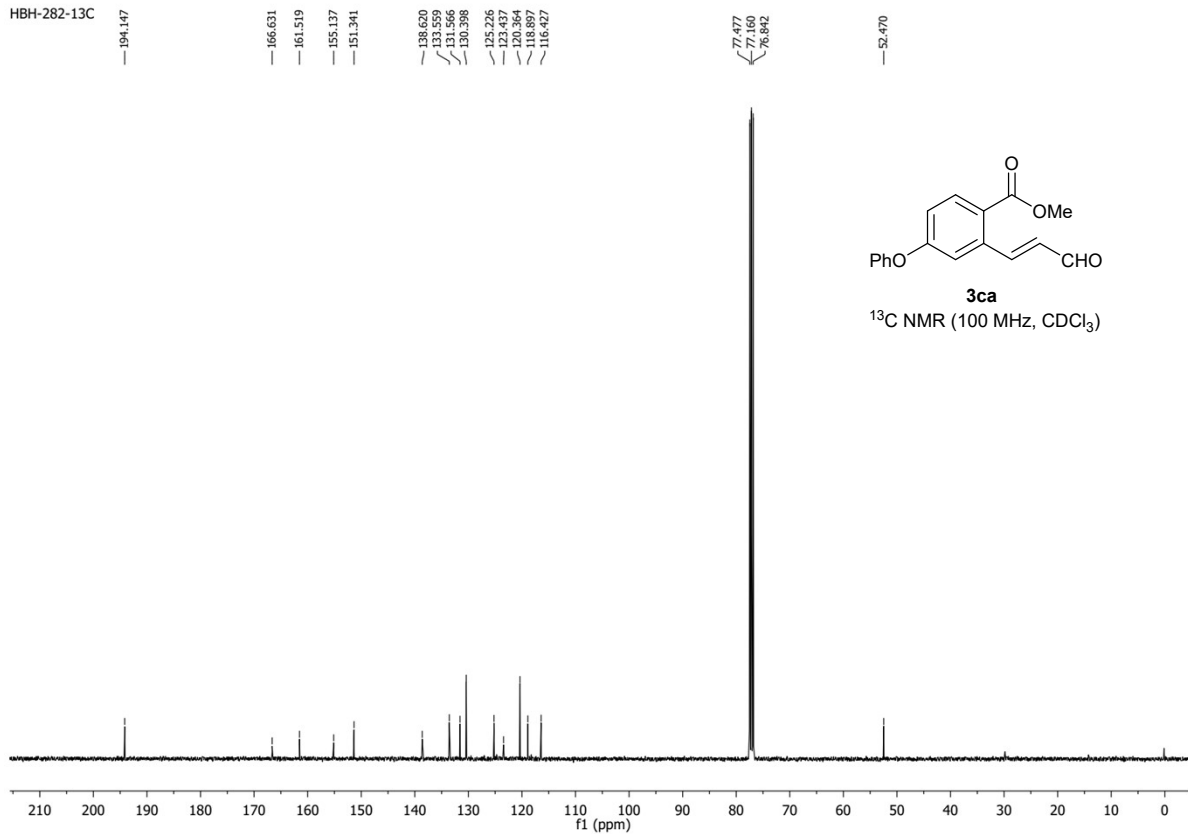

HBH-295-P-1H

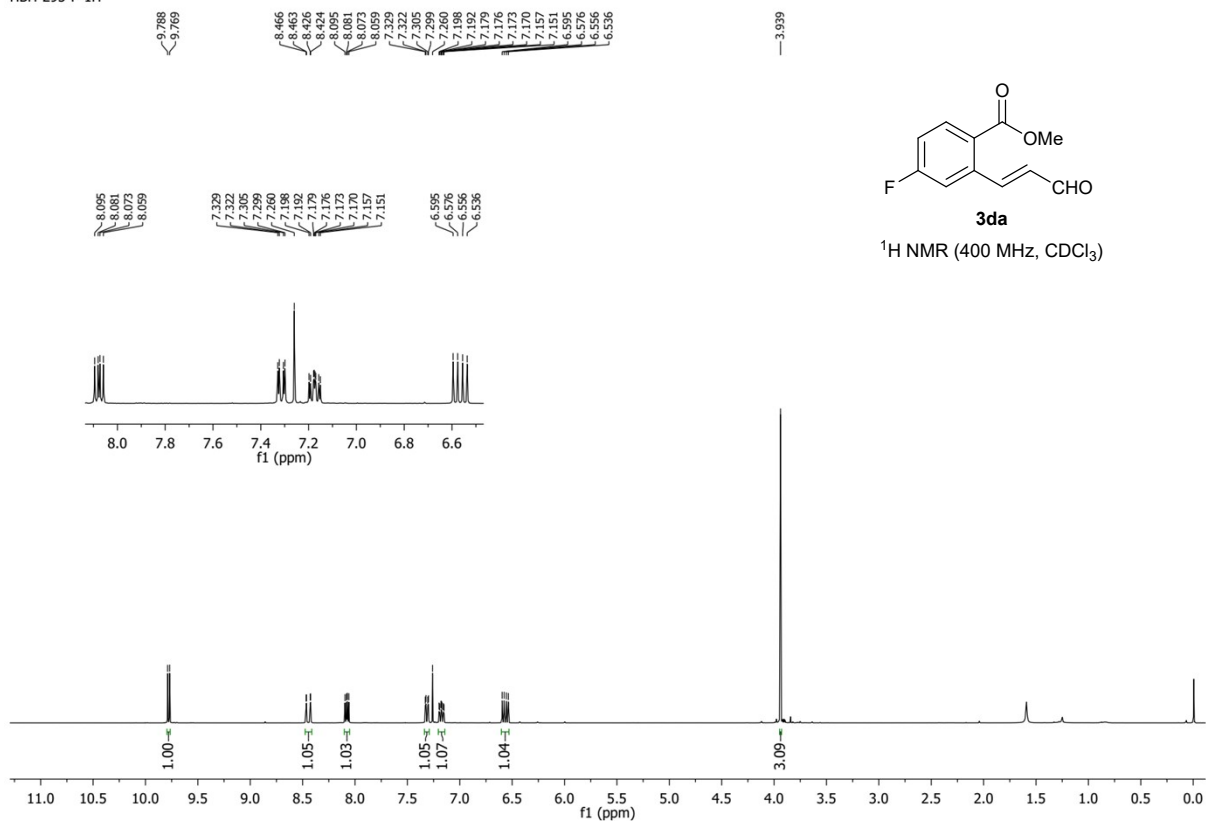

HBH-295-13C

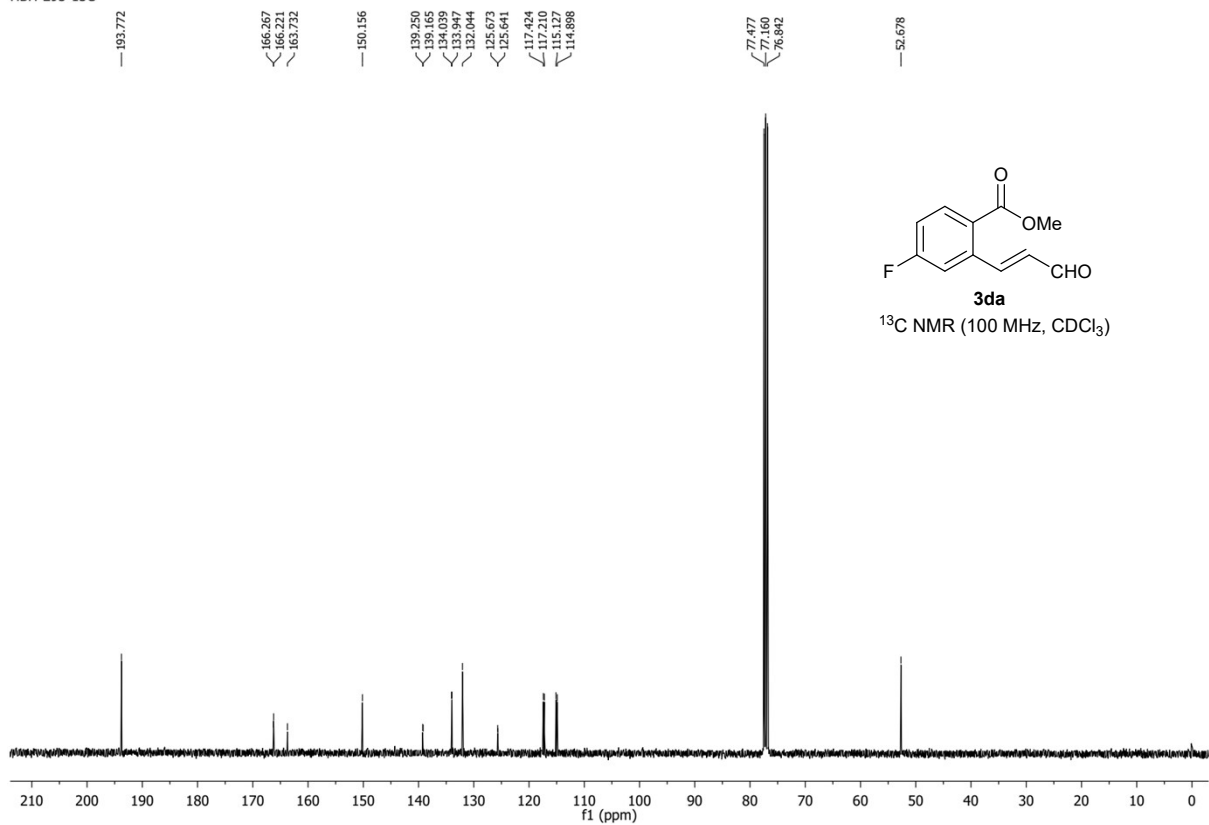

HBH-295-P-19F.1.fid

-105.185

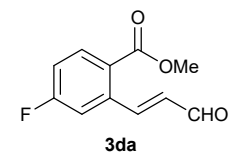

<sup>19</sup>F NMR (565 MHz, CDCl<sub>3</sub>)

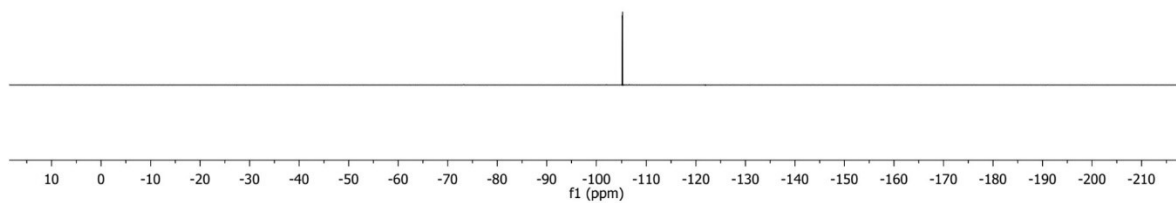

HBH-265-P-1H

9.779 9.760 8.401 8.361 7.918 7.897 7.777 7.772 7.636 7.632 7.615 7.610 7.260 6.606 6.587 6.565 6.547 3.943

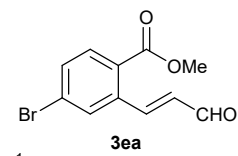

<sup>1</sup>H NMR (400 MHz, CDCl<sub>3</sub>)

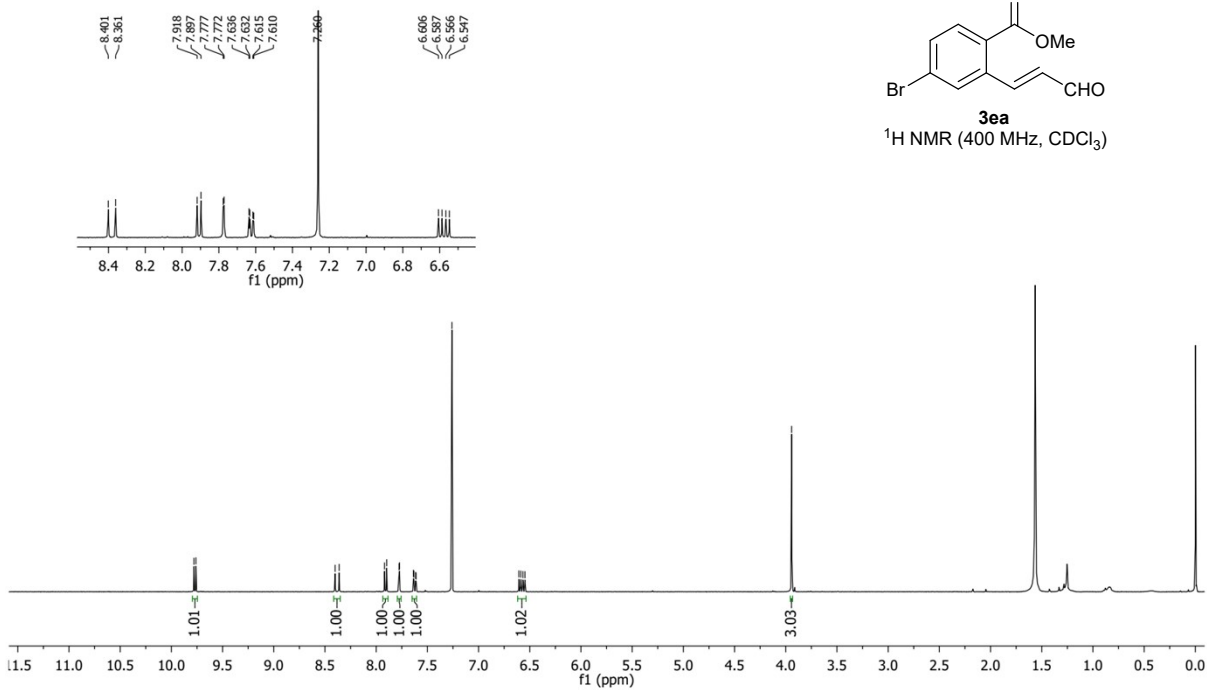

HBH-265-13C

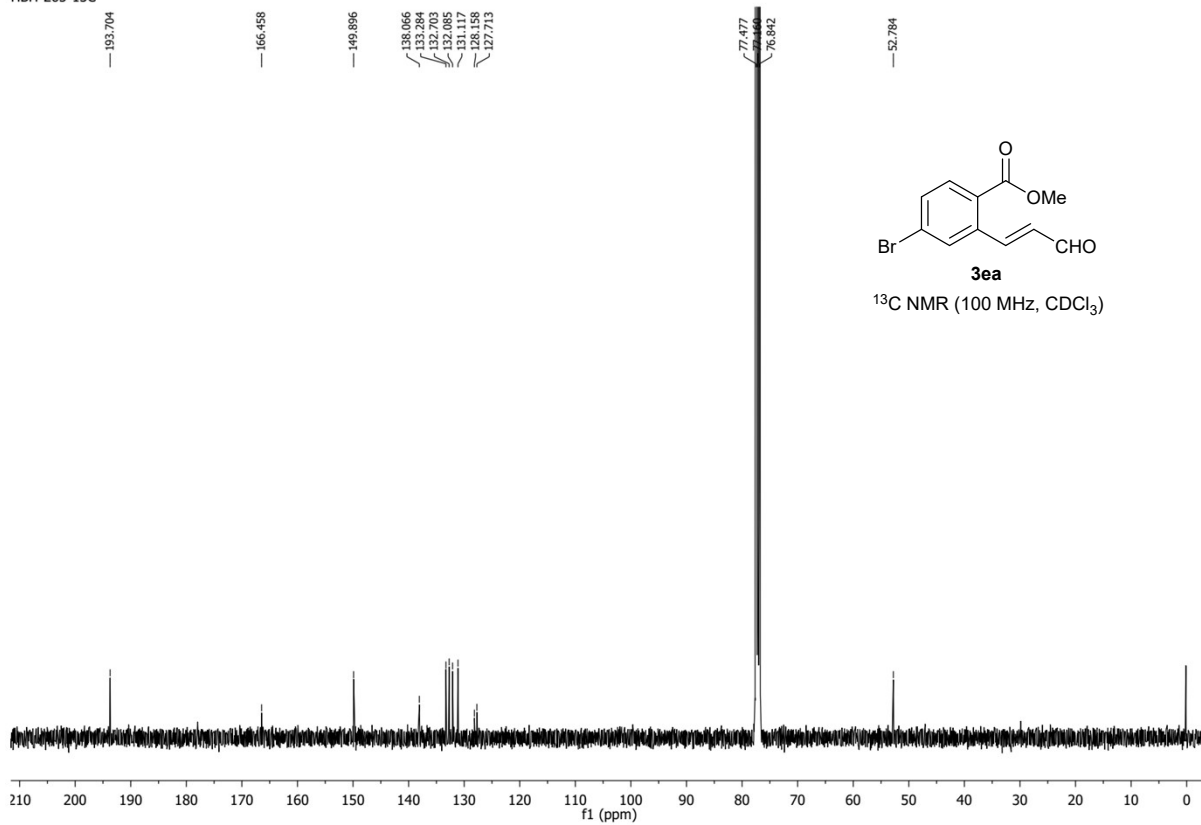

HBH-281-1H

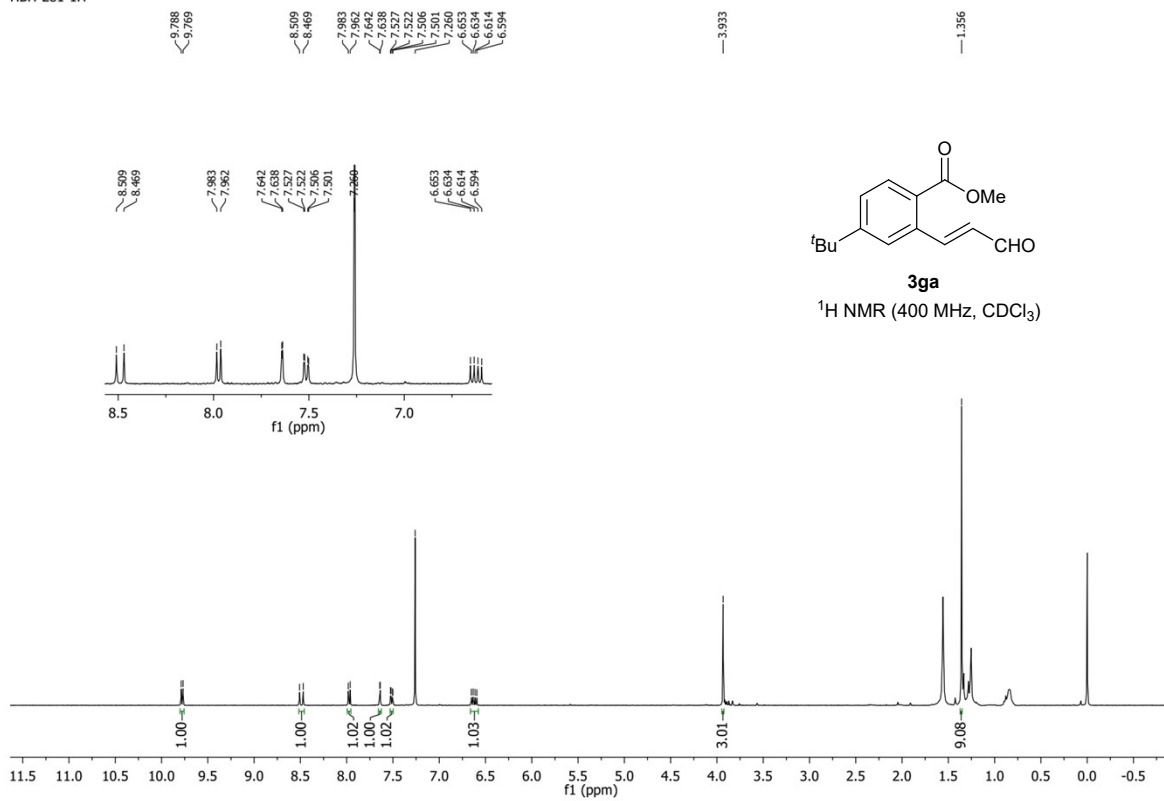

HBH-281-13C

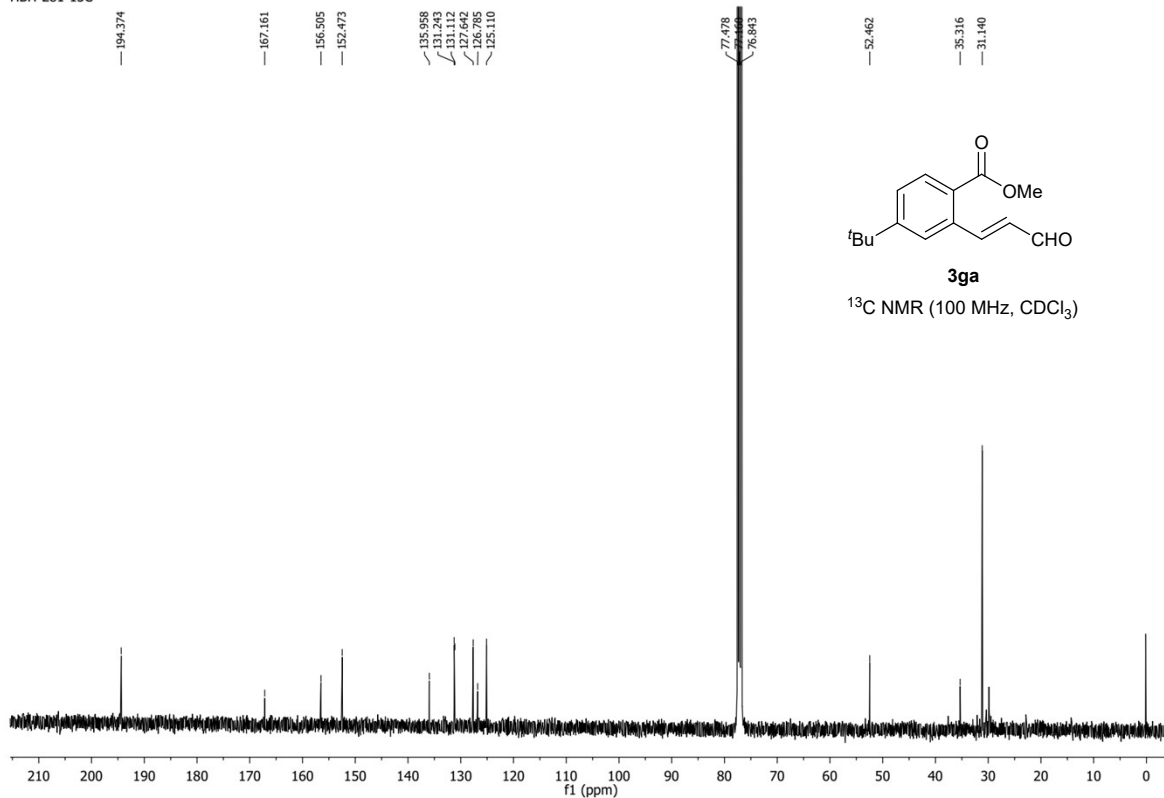

HBH-296-B\_1H.10.fid

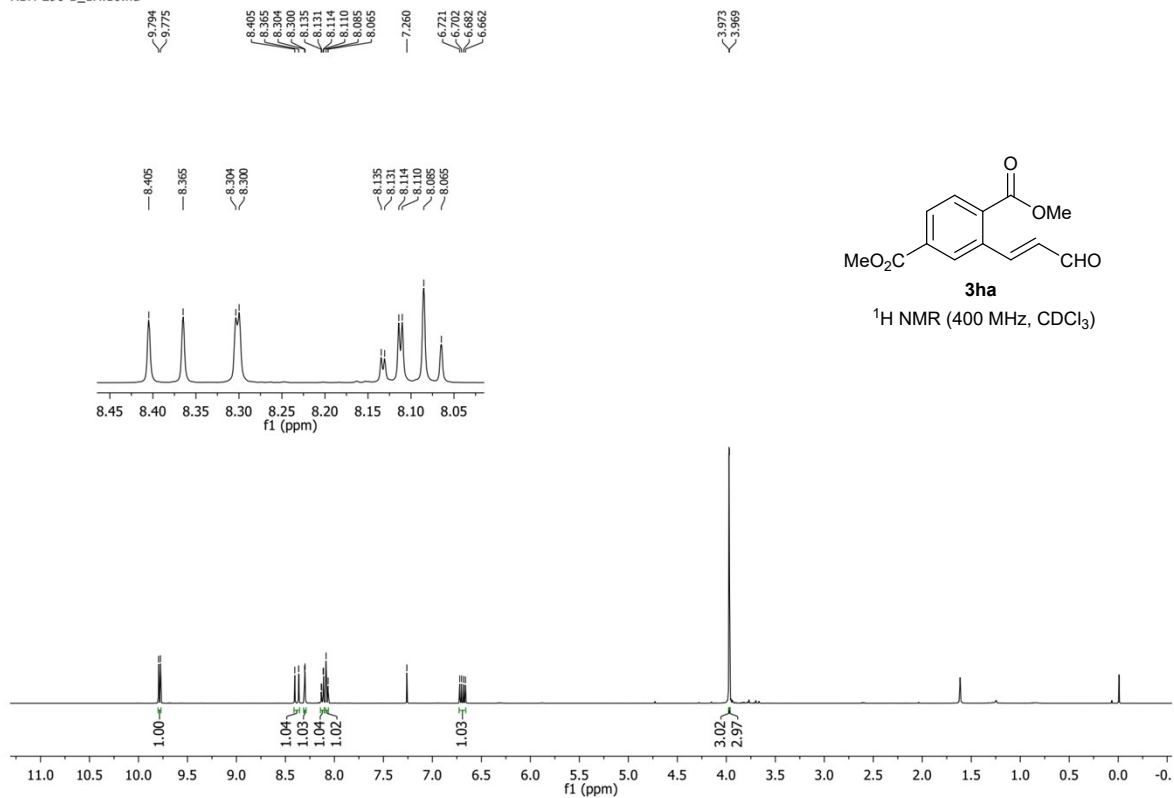

HBH-296-13C

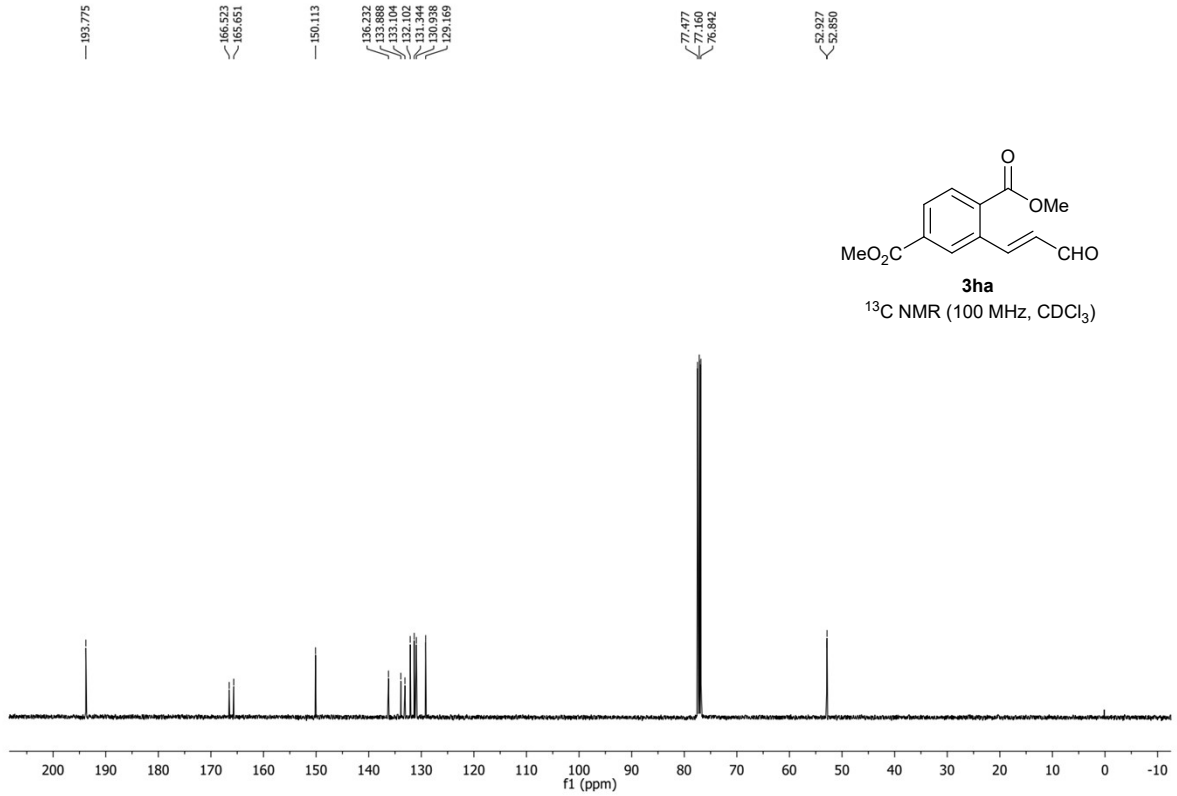

HBH-300-P\_1H.10.fid

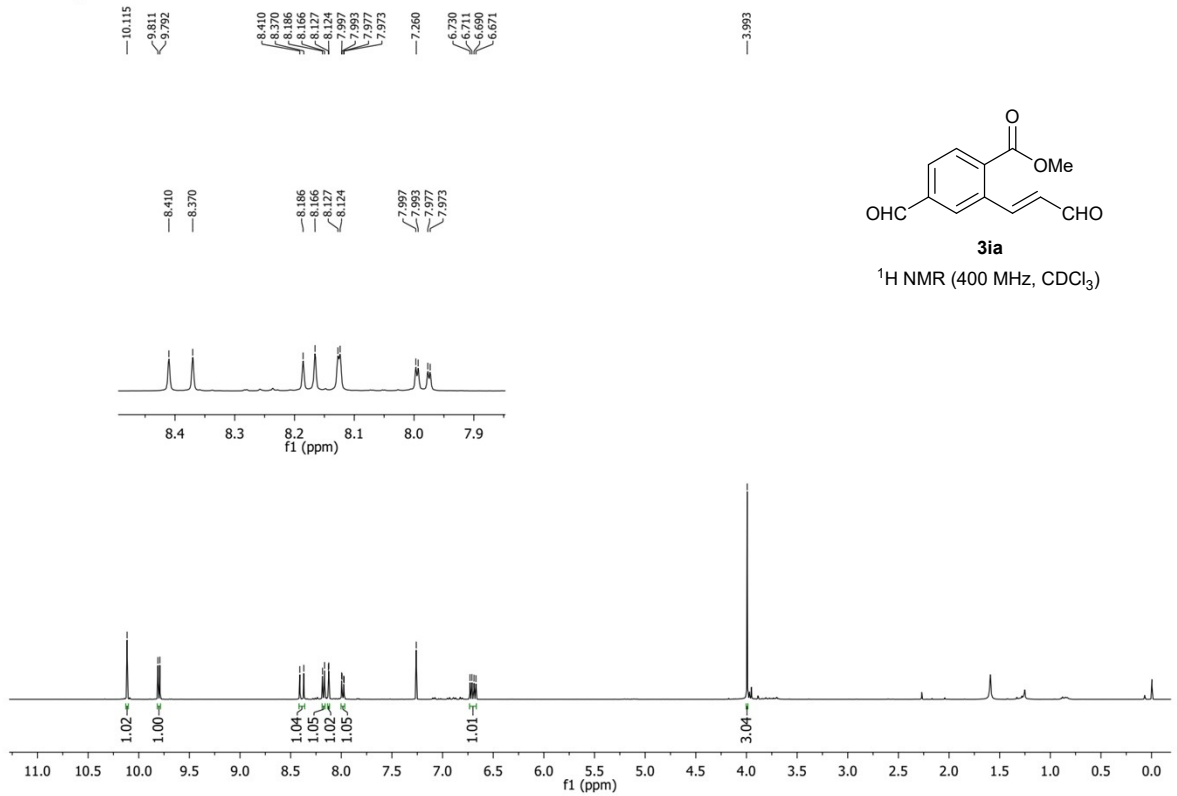

HBH-300-13C

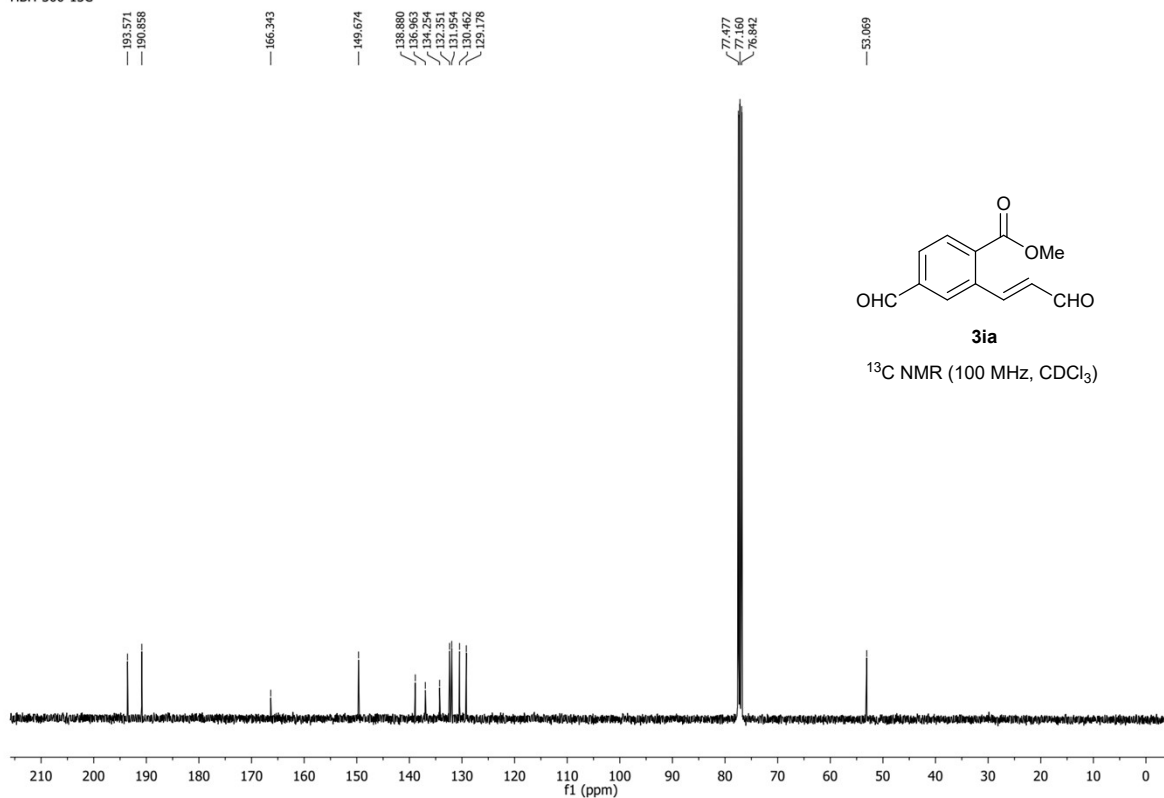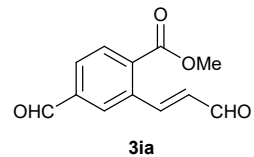

<sup>13</sup>C NMR (100 MHz, CDCl<sub>3</sub>)

HBH-365-P-1H.1.fid

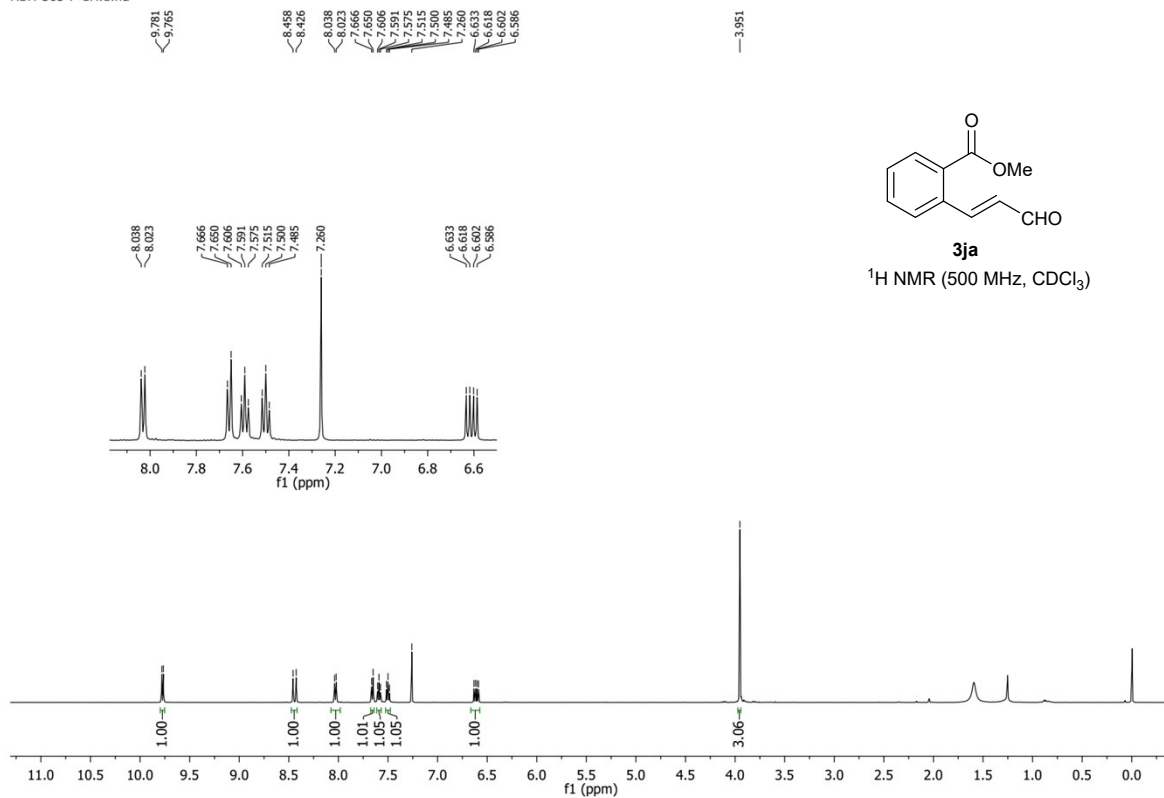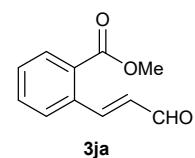

<sup>1</sup>H NMR (500 MHz, CDCl<sub>3</sub>)



HBH-365-P-13C.3.fid

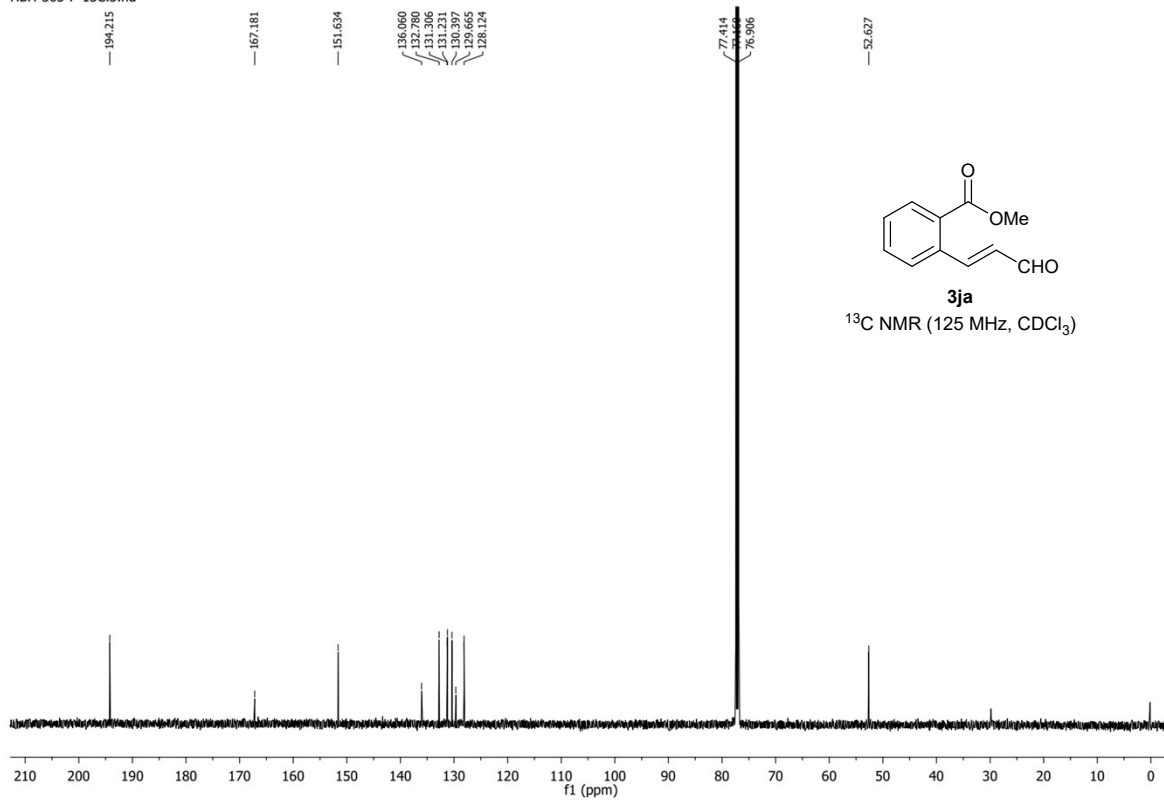

HBH-285-P-1H

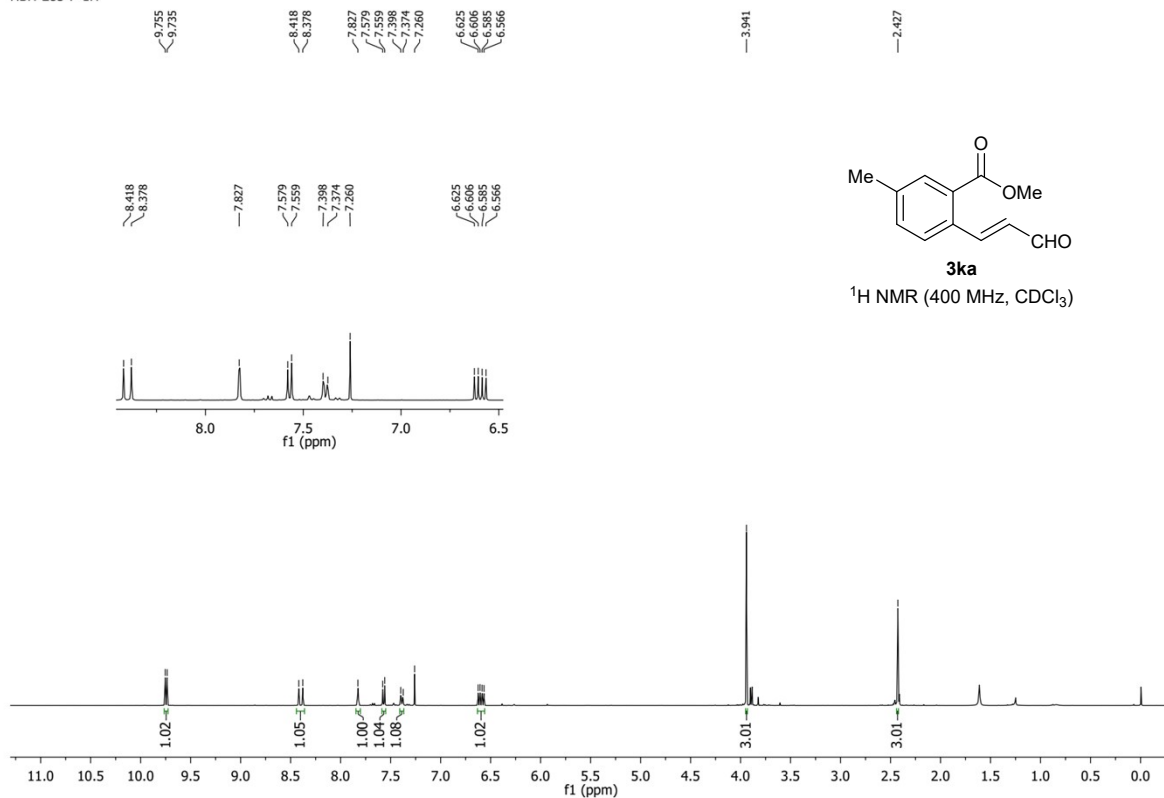

HBH-285-13C

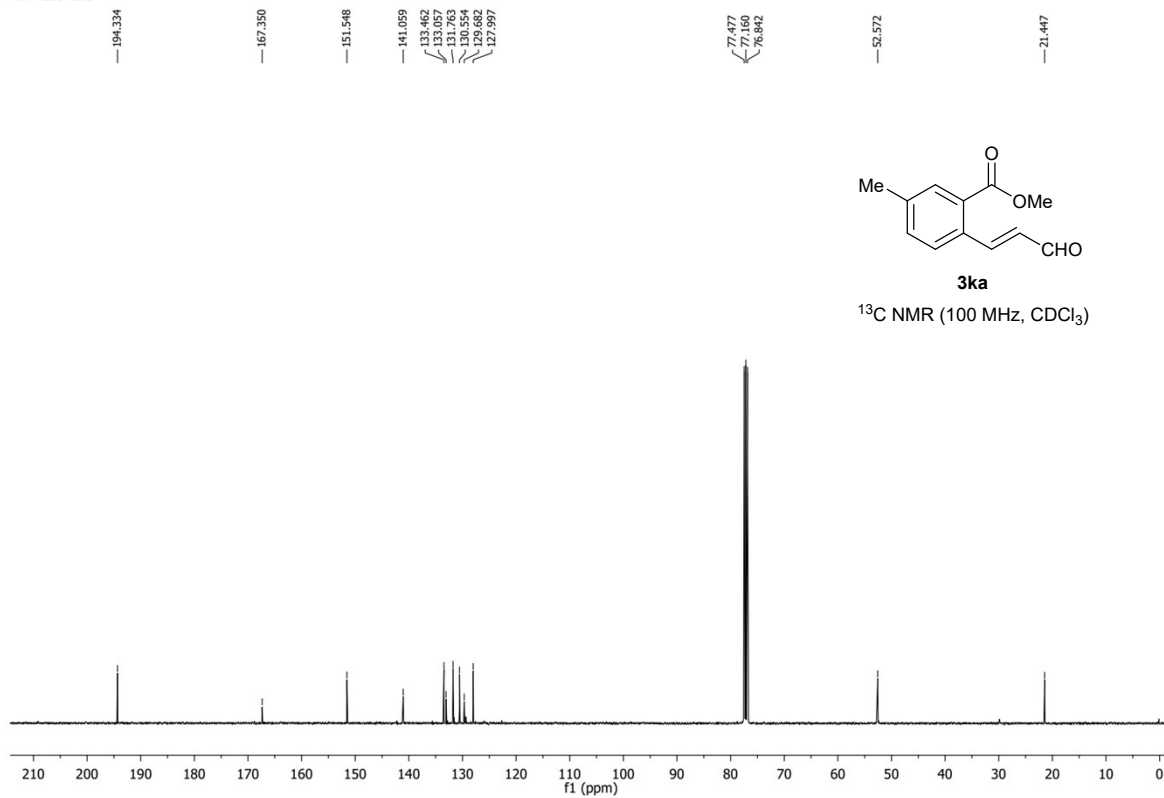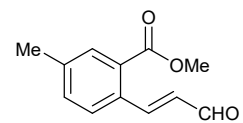

**3ka**

<sup>13</sup>C NMR (100 MHz, CDCl<sub>3</sub>)

HBH-289-P-1H.1.fid

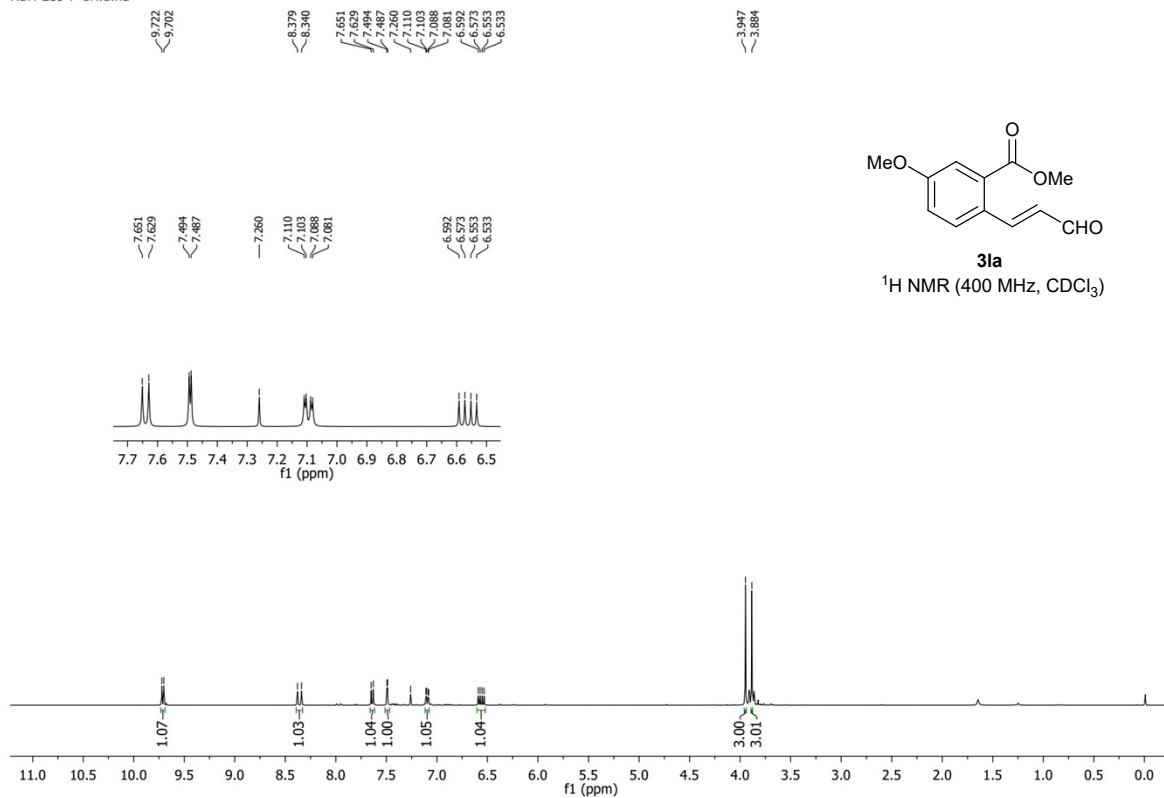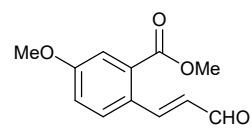

**3la**

<sup>1</sup>H NMR (400 MHz, CDCl<sub>3</sub>)

HBH-289-13C

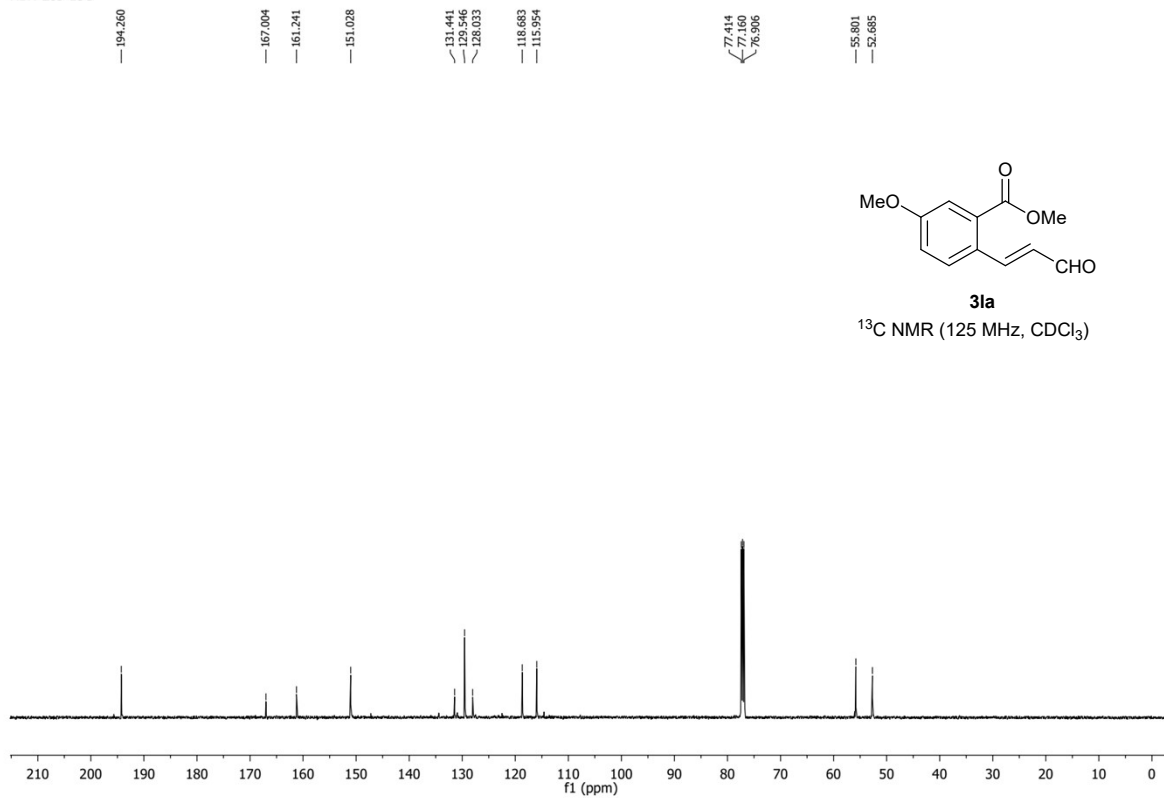

HBH-312-P(2)-1H.1.fid

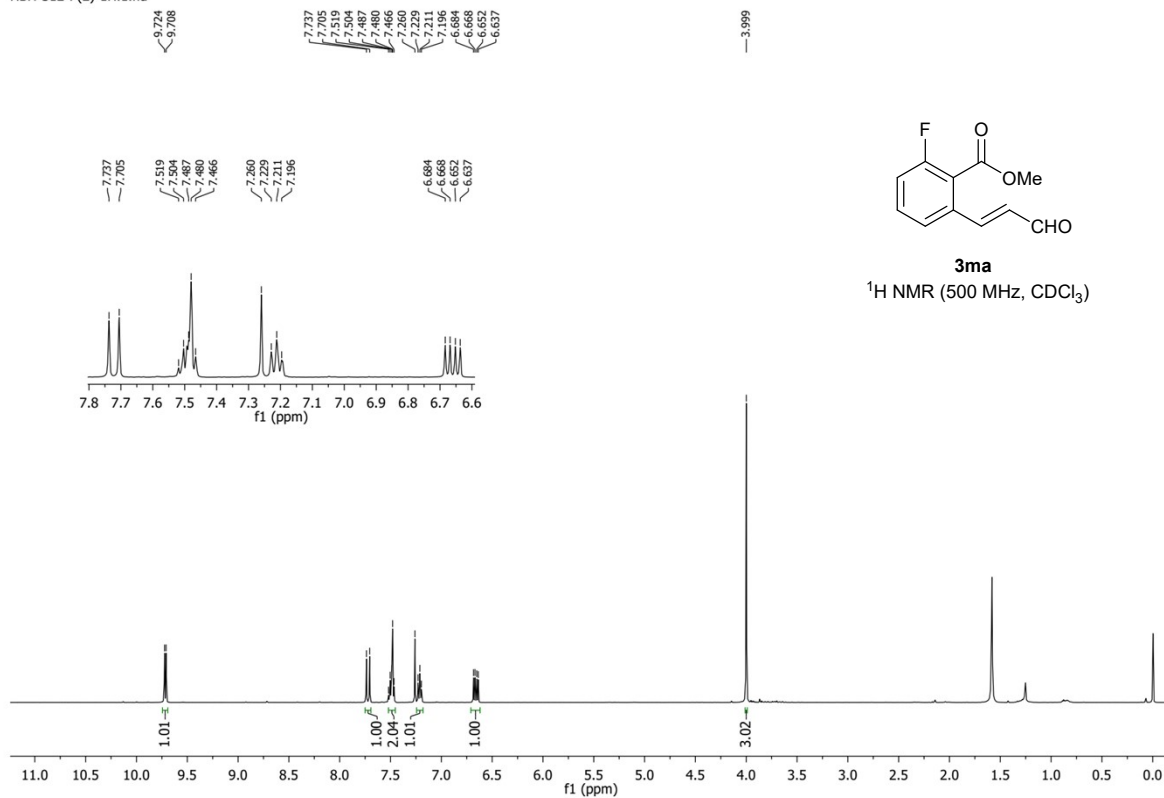

HBH-312-P(2)-13C.5.fid

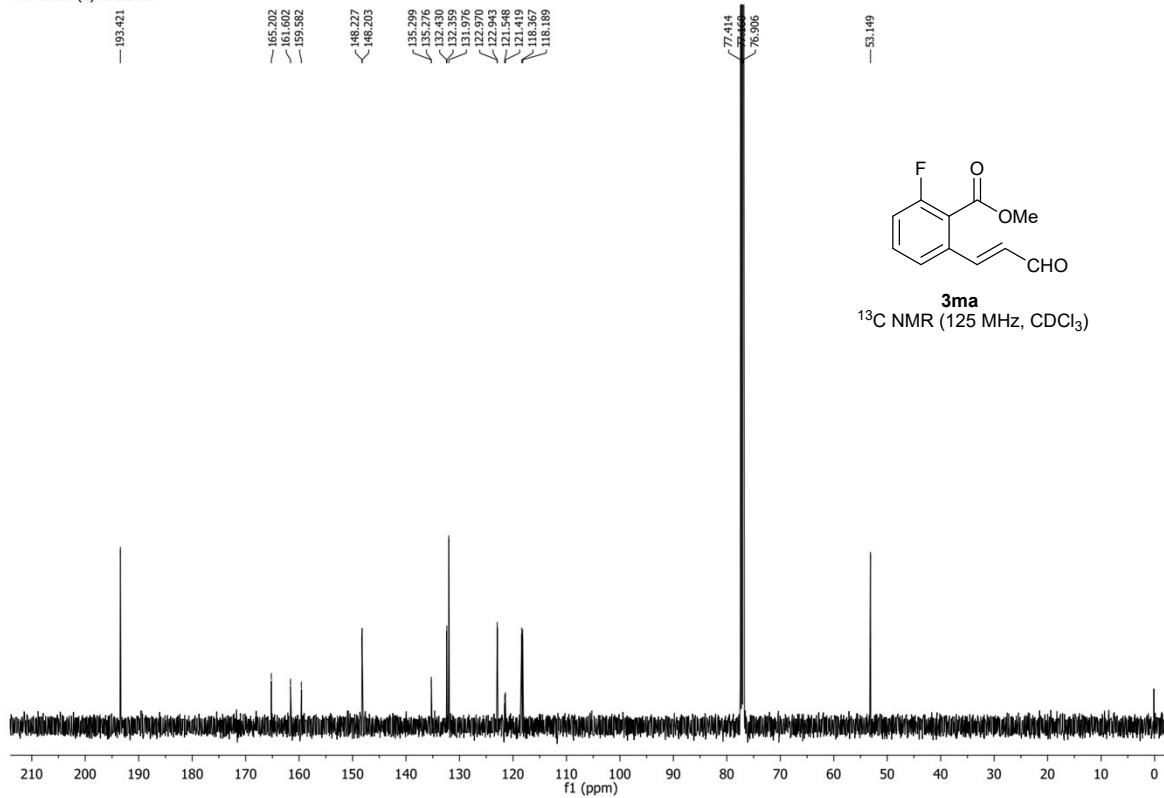

HBH-312-P(2)-19F.3.fid

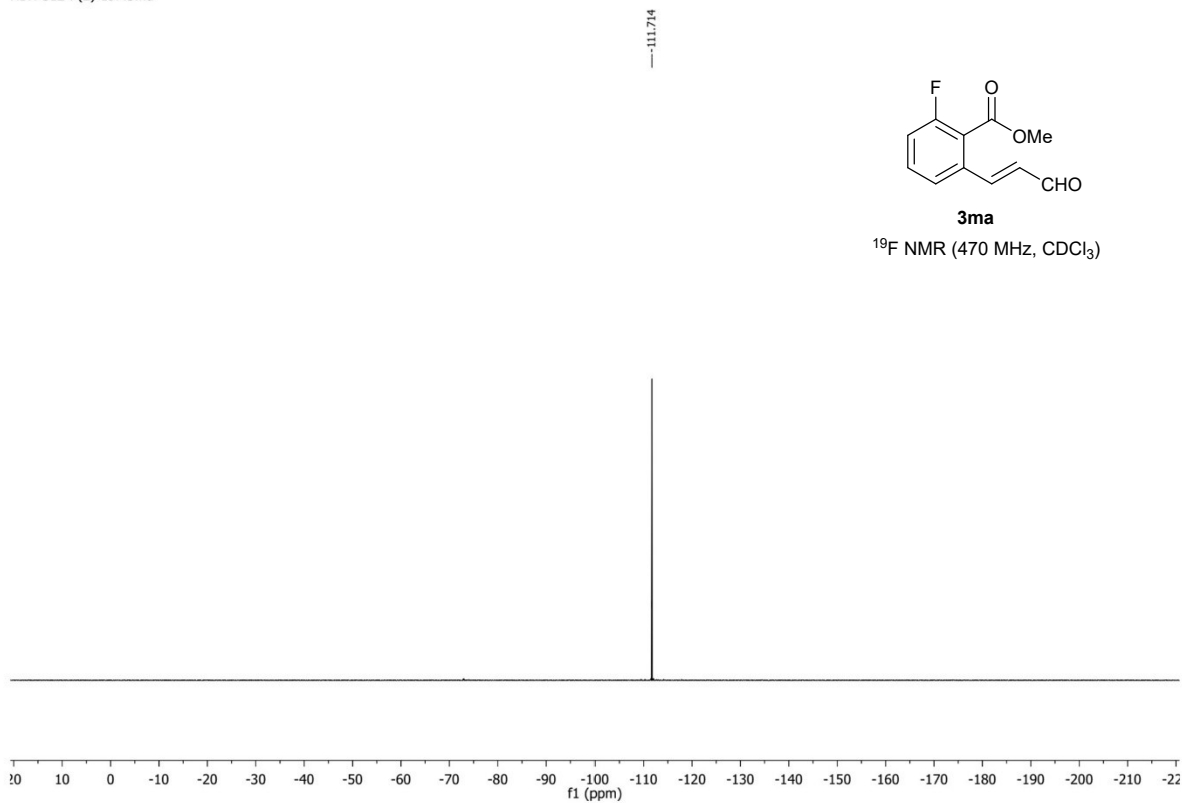

HBH-246-A-1H.1.fid

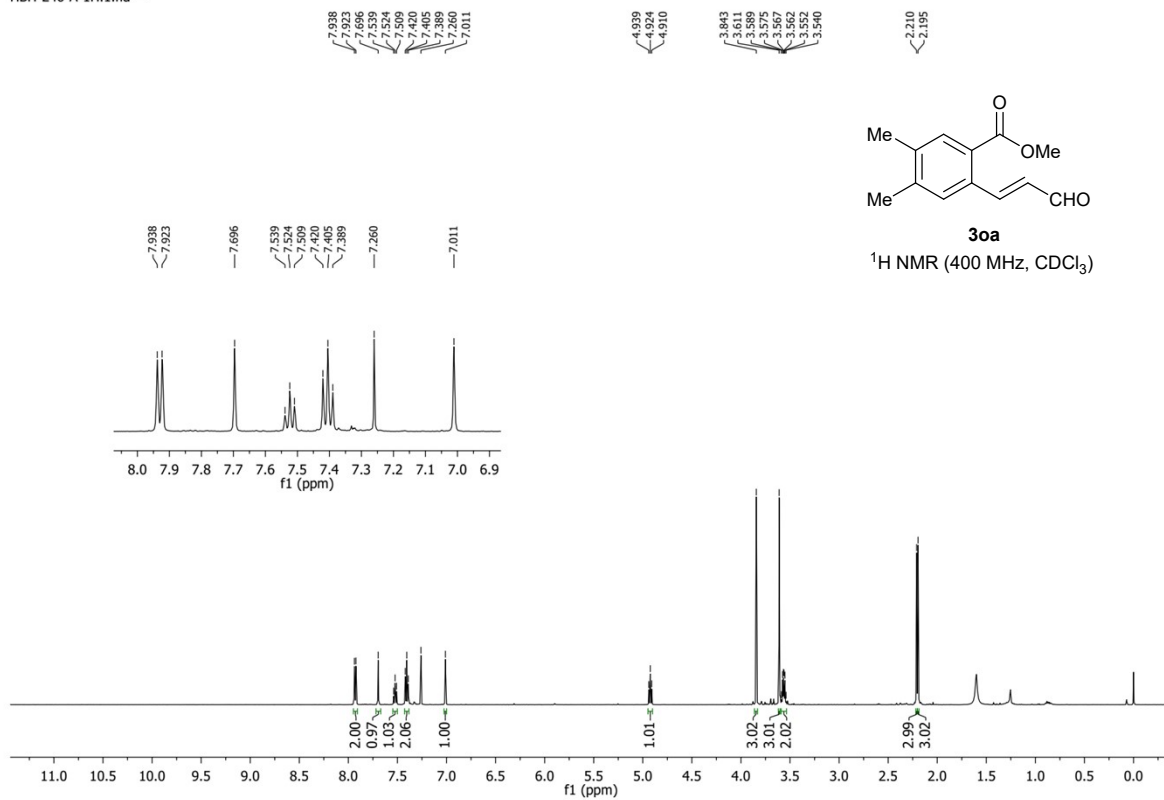

HBH-247-13C

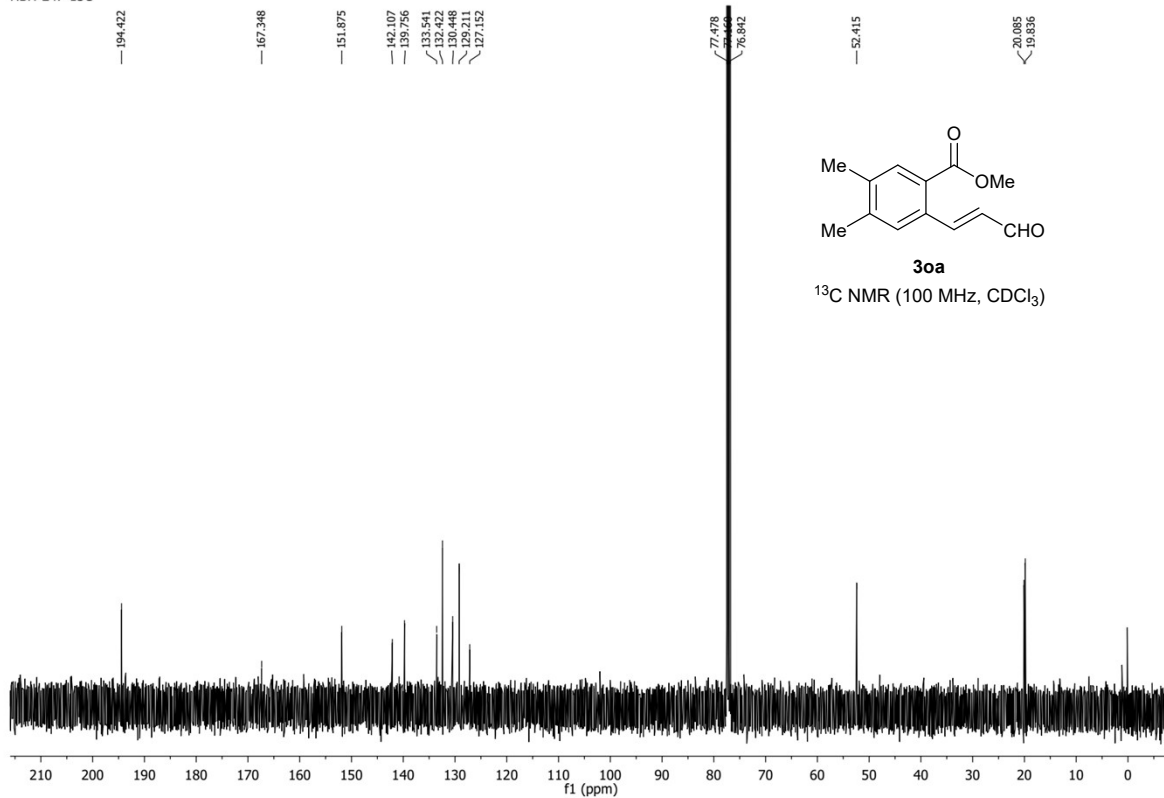

HBH-343-P-1H.1.fid

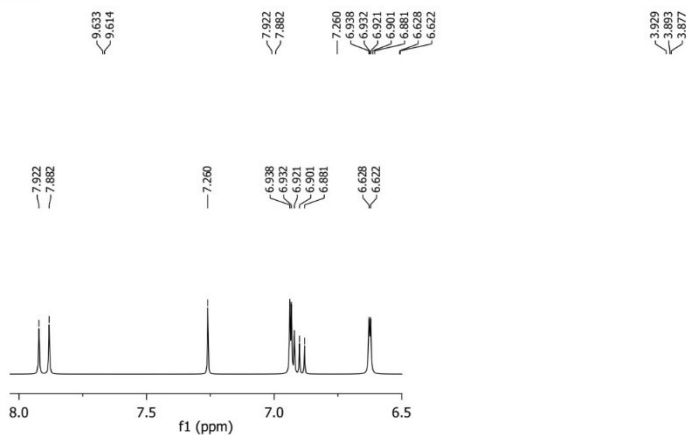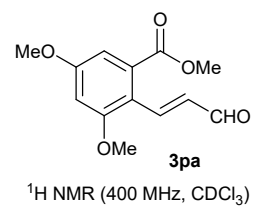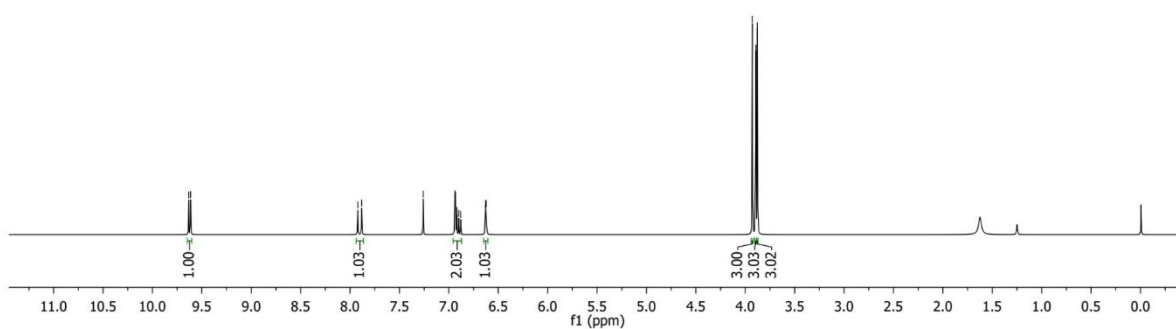

HBH-343-13C

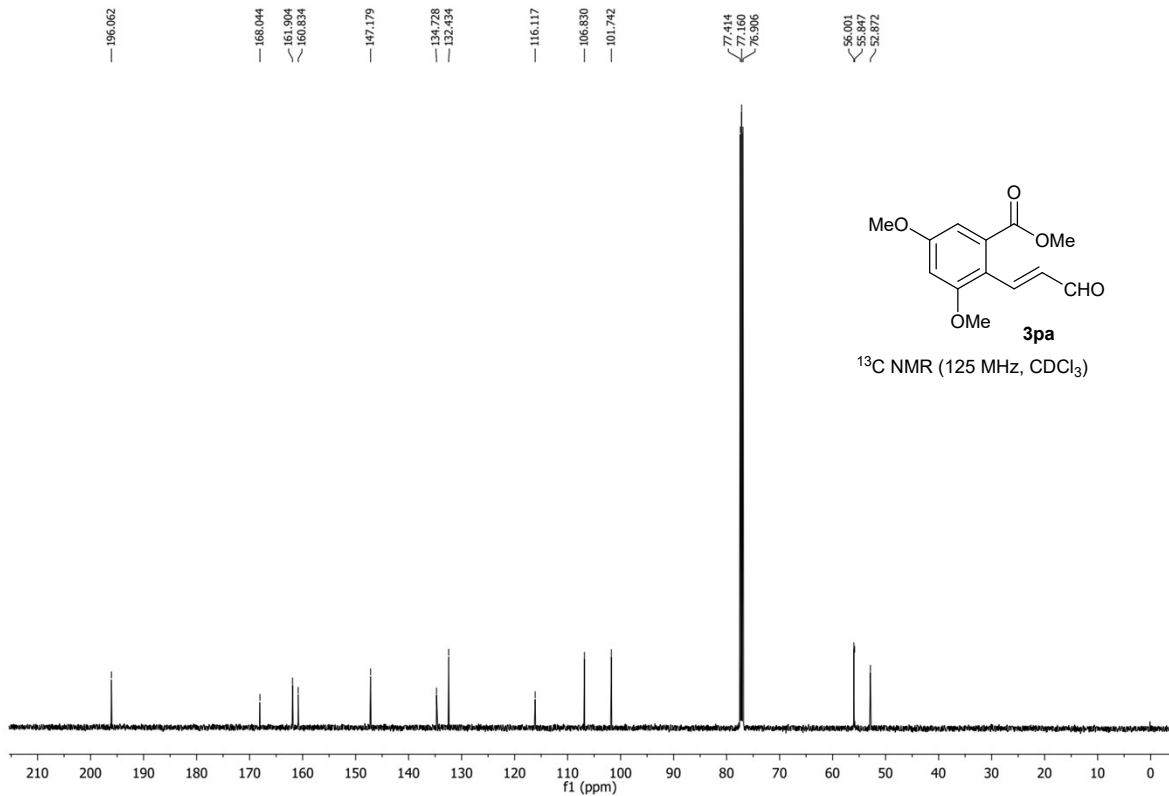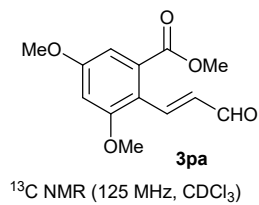

HBH-260-A\_1H.10.fid

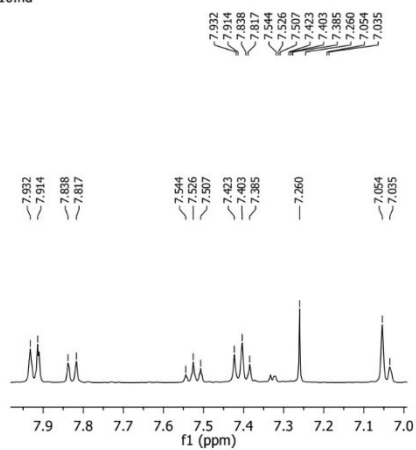

4.966, 4.947, 4.929

3.849, 3.832, 3.815, 3.698, 3.680, 3.665, 3.591, 3.587

2.284

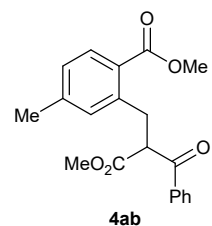

<sup>1</sup>H NMR (400 MHz, CDCl<sub>3</sub>)

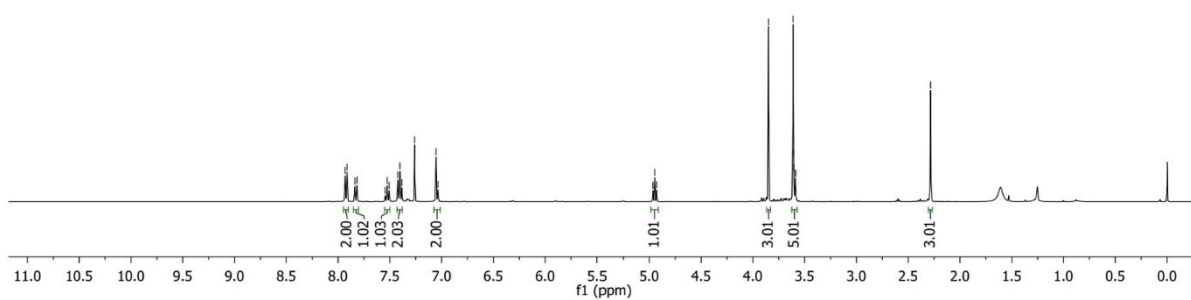

HBH-260-A\_13C.12.fid

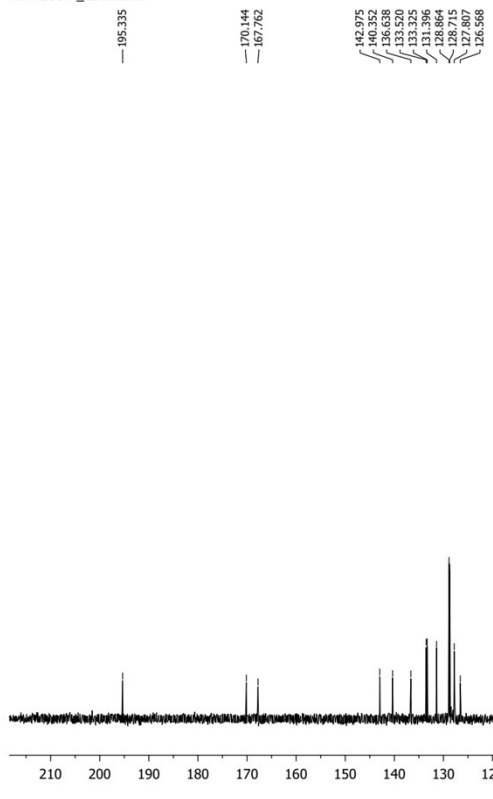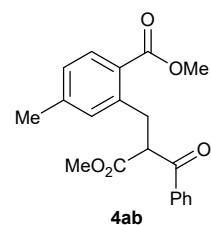

<sup>13</sup>C NMR (100 MHz, CDCl<sub>3</sub>)

HBH-255-P-1H.1.fid

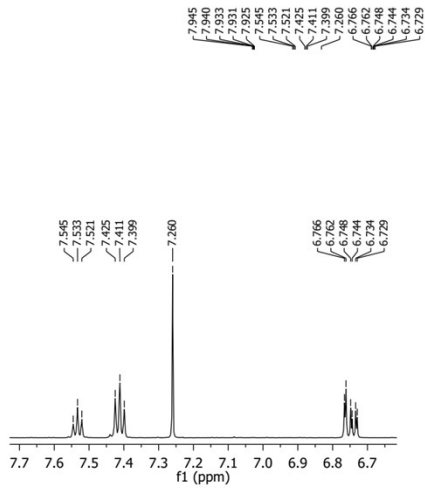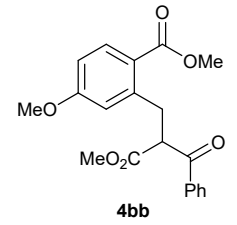

<sup>1</sup>H NMR (600 MHz, CDCl<sub>3</sub>)

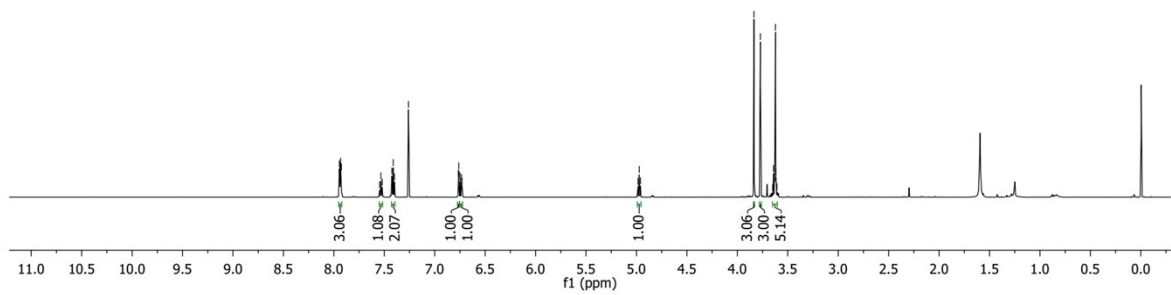

HBH-255-P-13C.3.fid

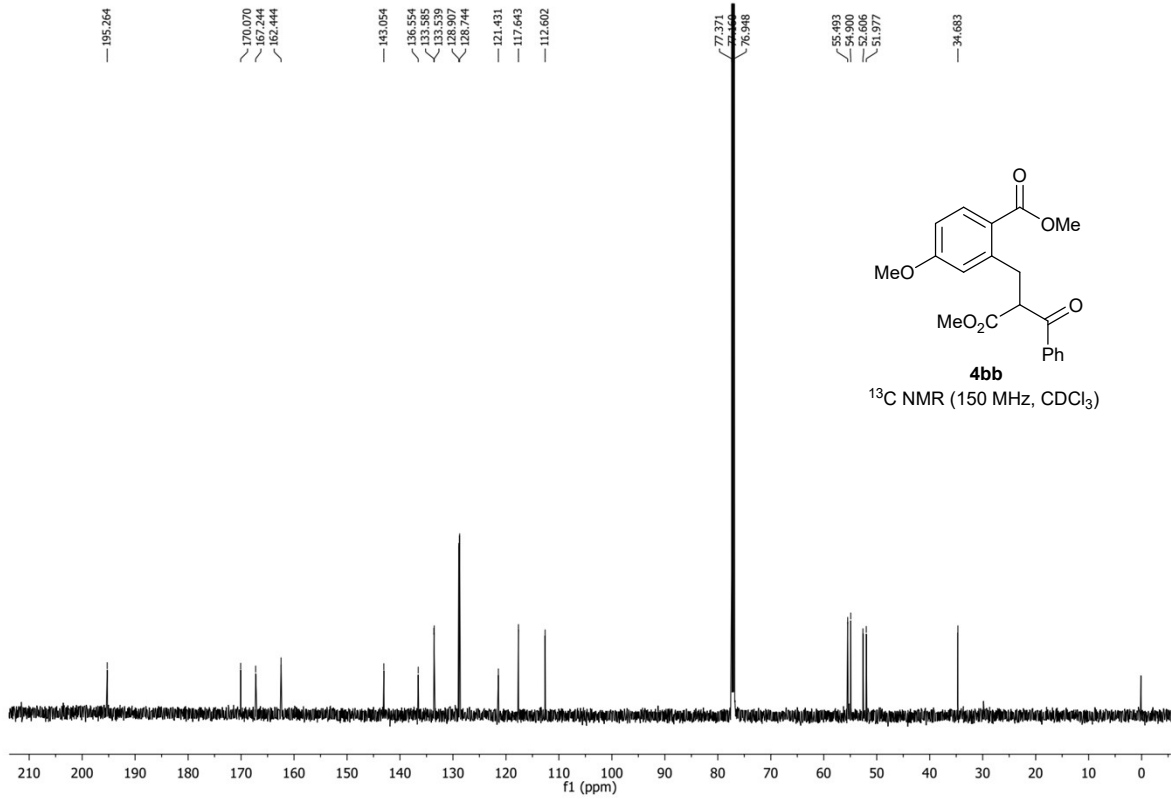



HBH-229-A-1-1H.1.fid

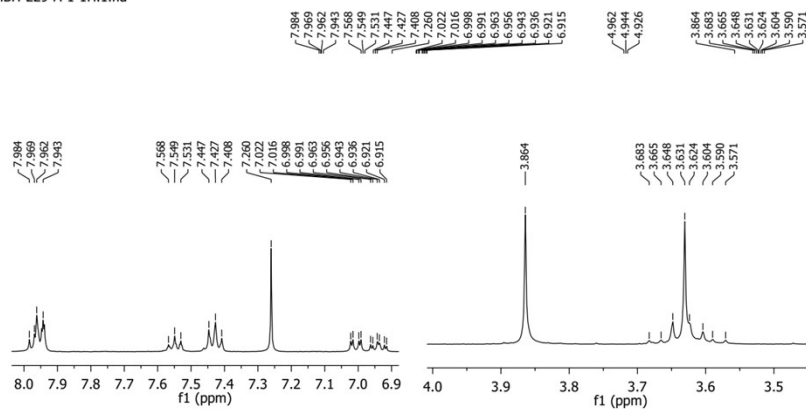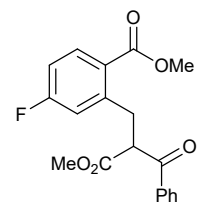

**4db**  
<sup>1</sup>H NMR (400 MHz, CDCl<sub>3</sub>)

HBH-329-A-13C.1.fid

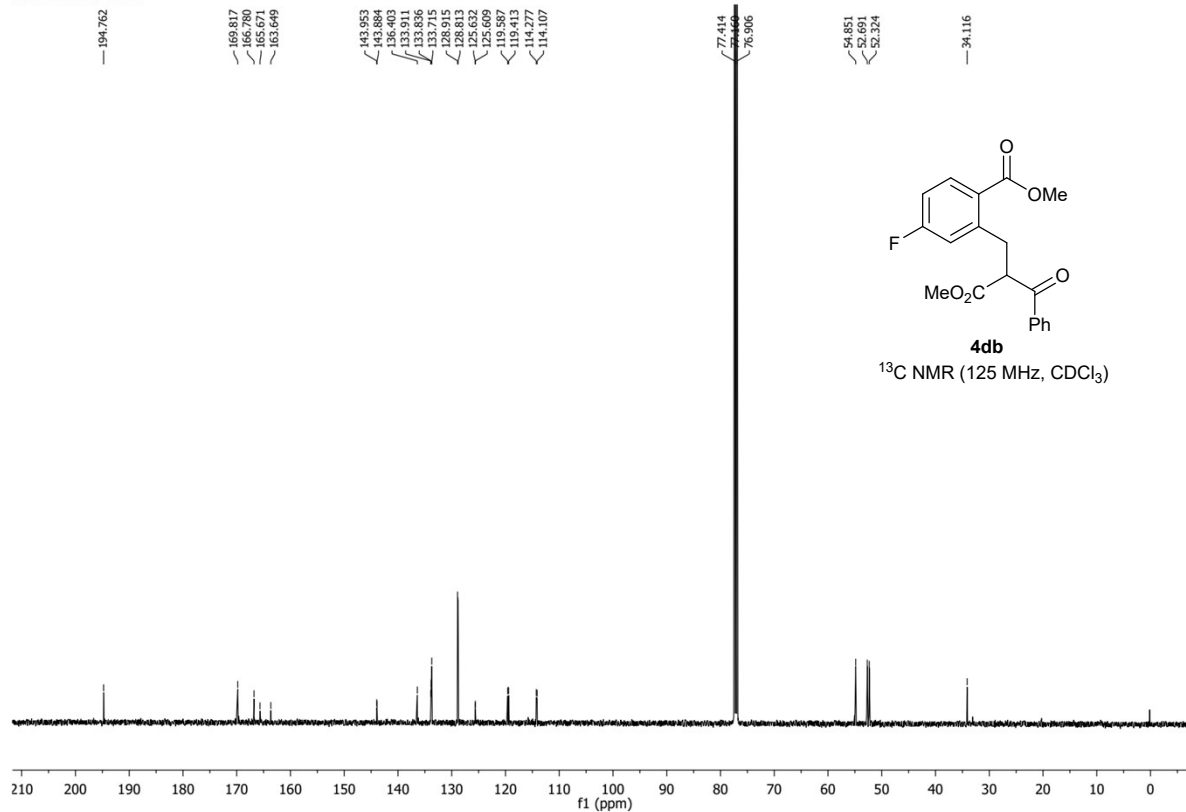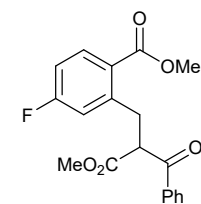

**4db**  
<sup>13</sup>C NMR (125 MHz, CDCl<sub>3</sub>)

HBH-329-P-19F.1.fid

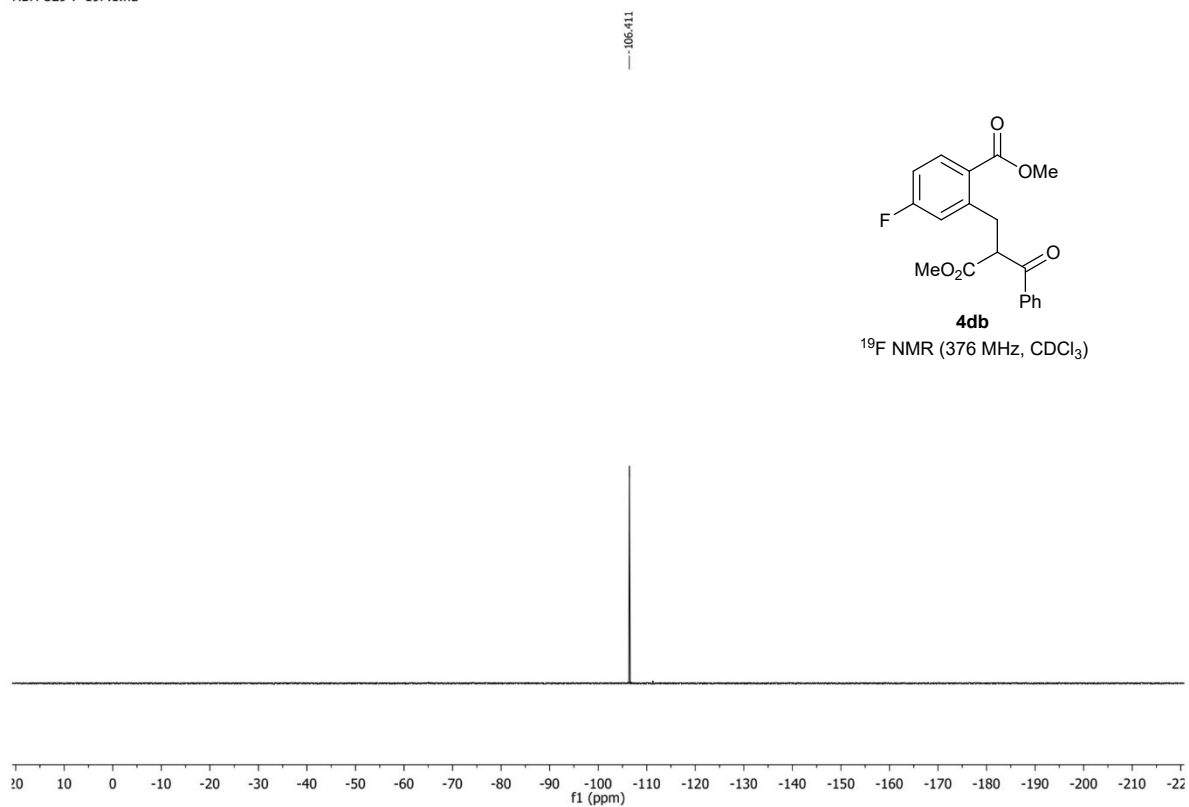

HBH-366-P-1H.1.fid

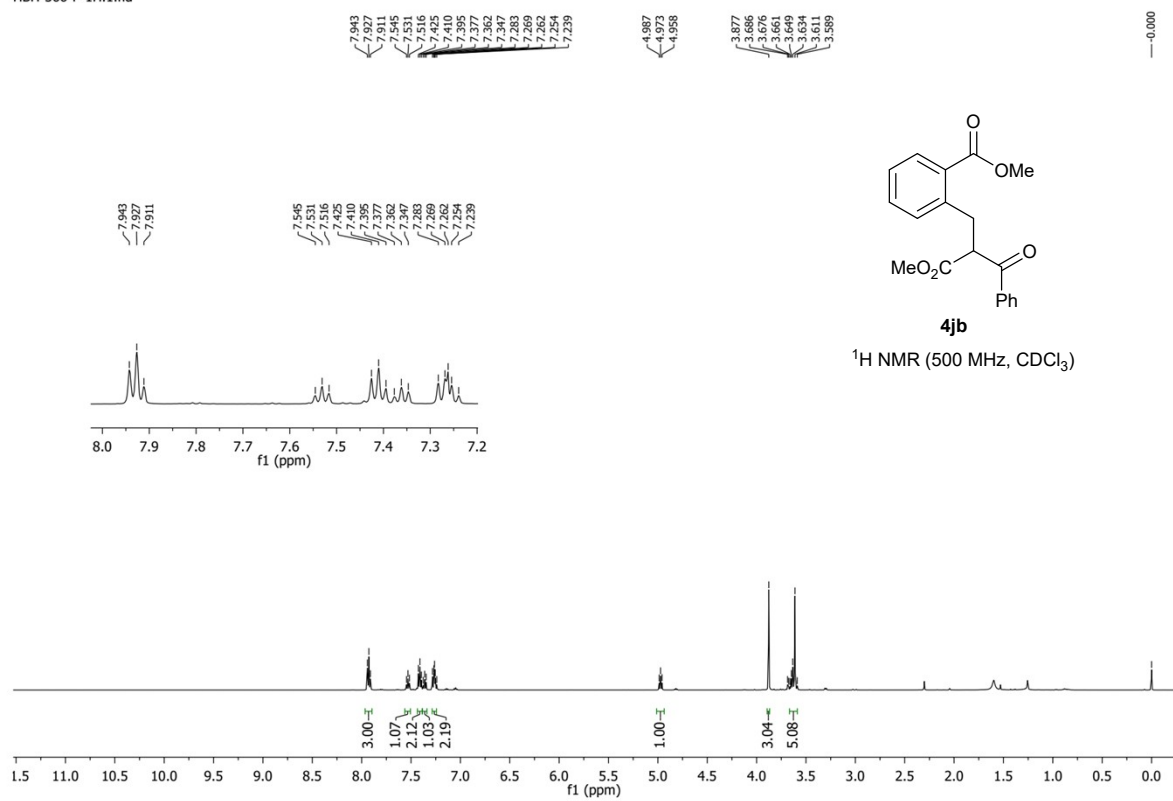

HBH-366-P-13C.3.fid

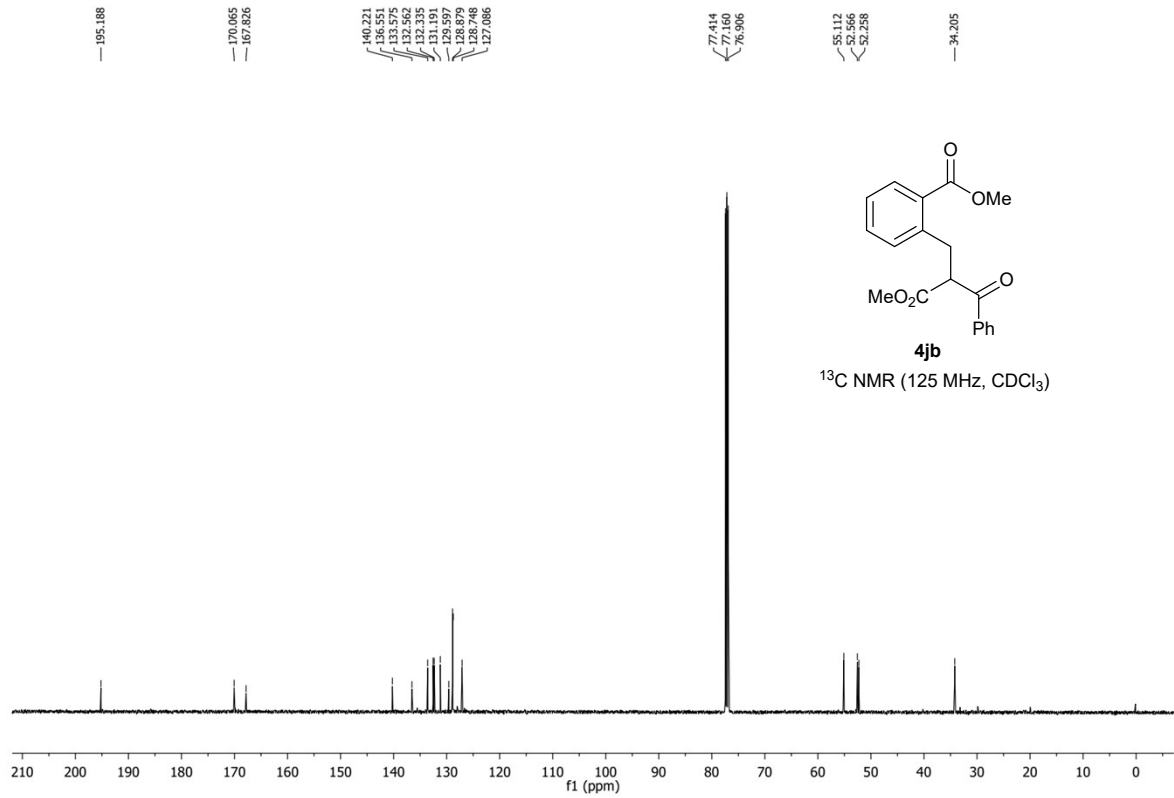

HBH-288-A-1H.1.fid

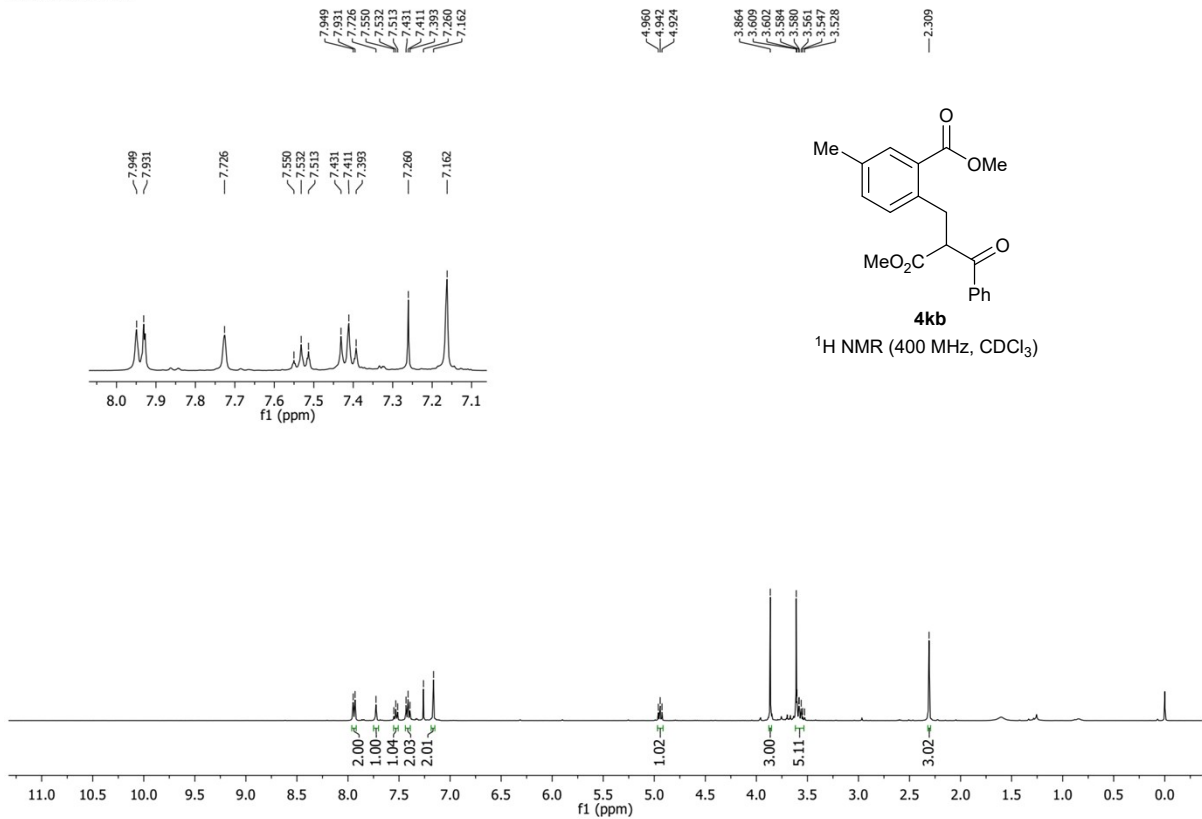

HBH-288-A\_13C.12.fid

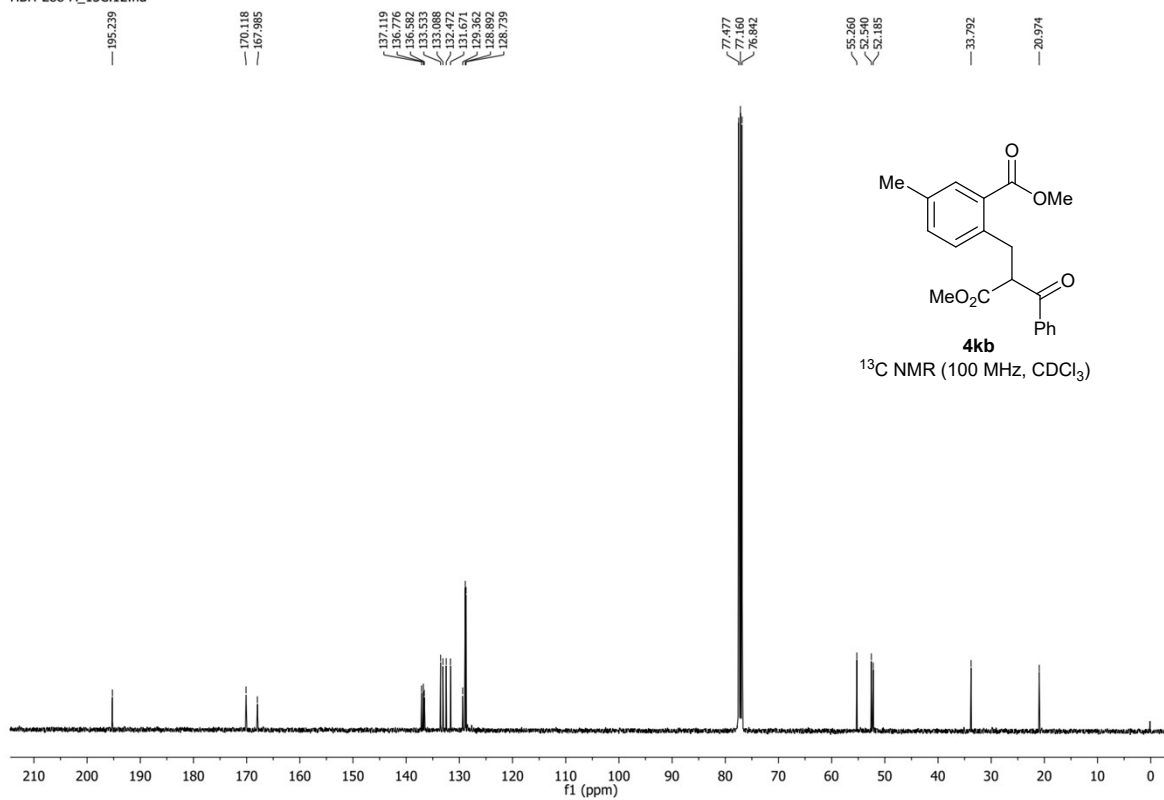

HBH-353-A-1H.3.fid

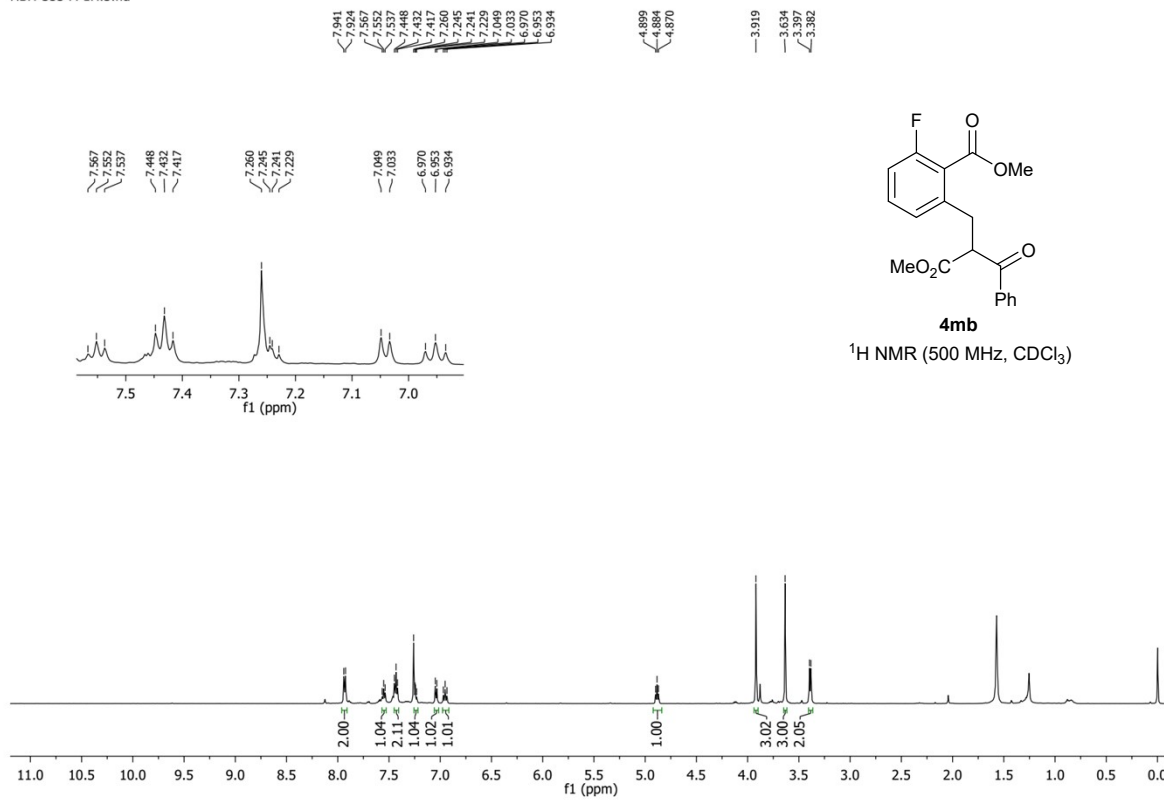

HBH-353-A-13C.1.fid

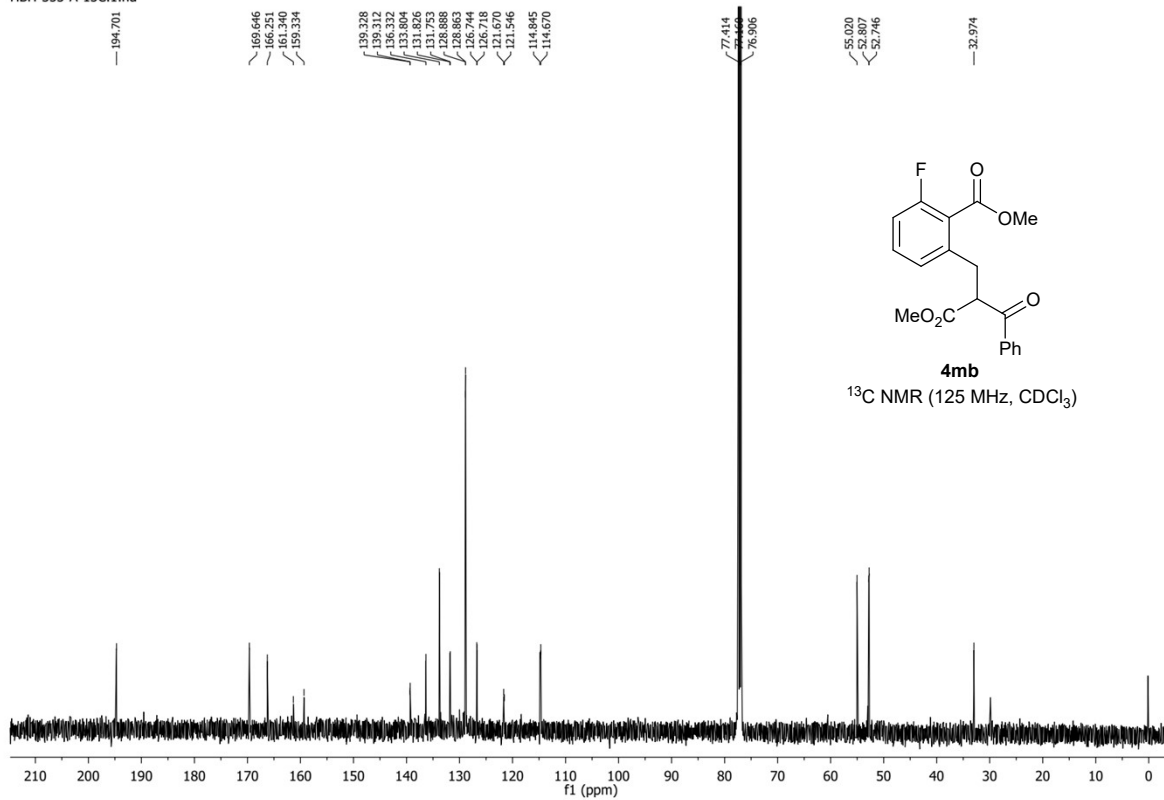

HBH-353-P-19F.1.fid

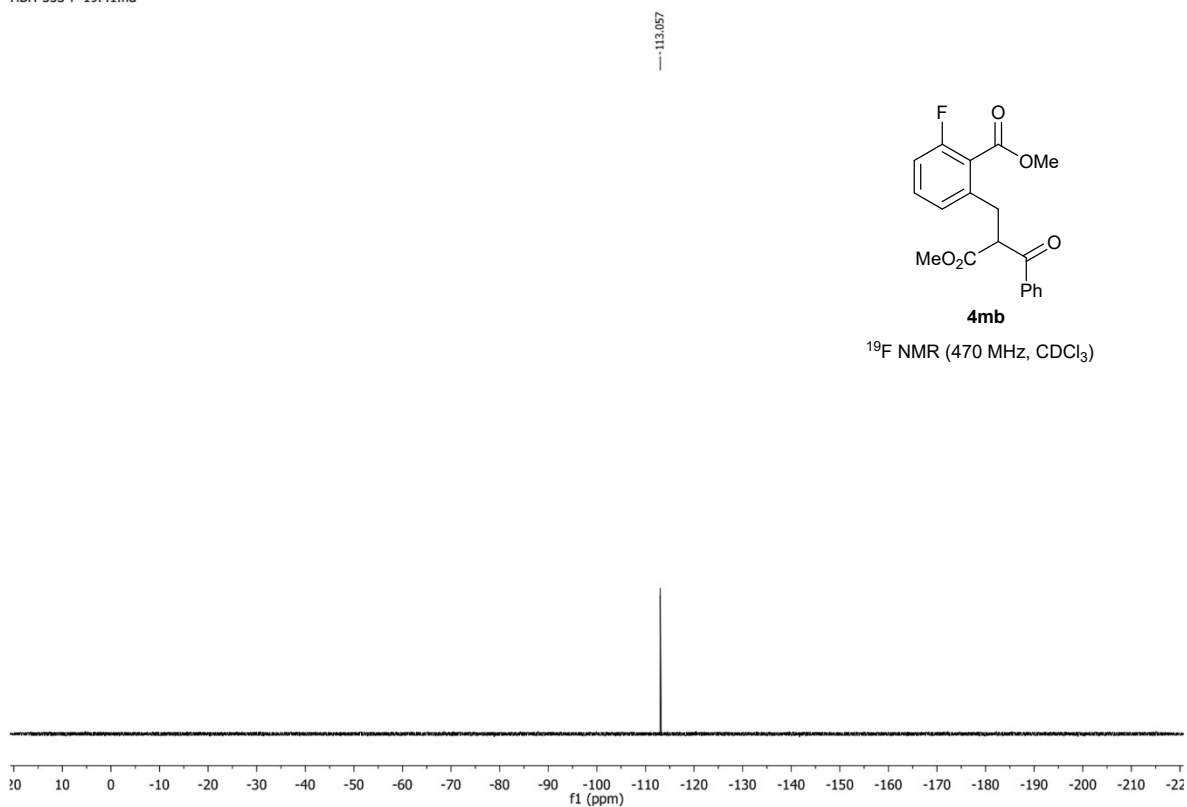

HBH-246-A-1H.1.fid

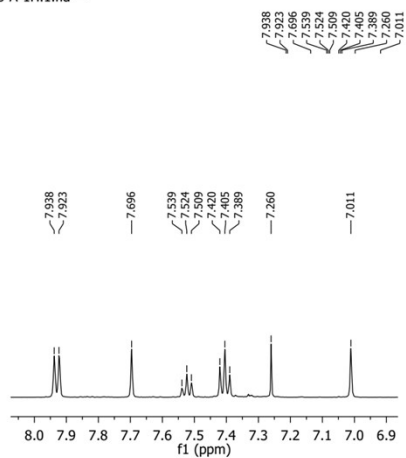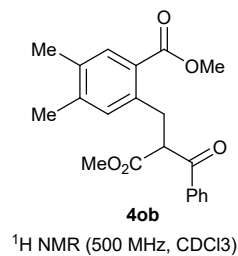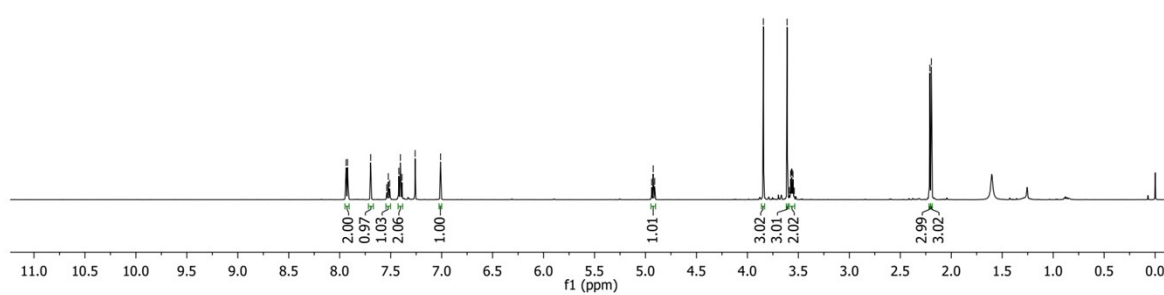

HBH-246-A-13C.3.fid

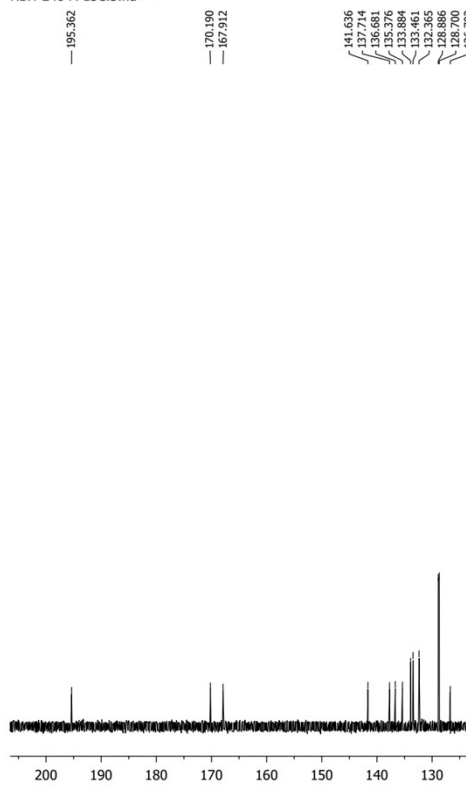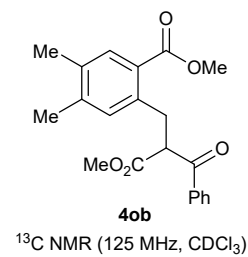

HBH-346-P-1H.1.fid

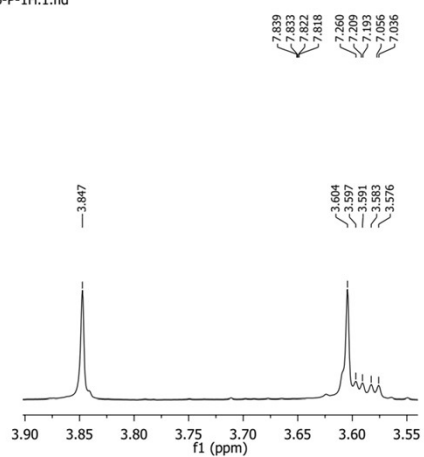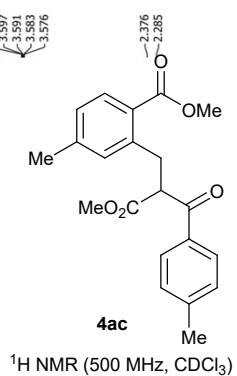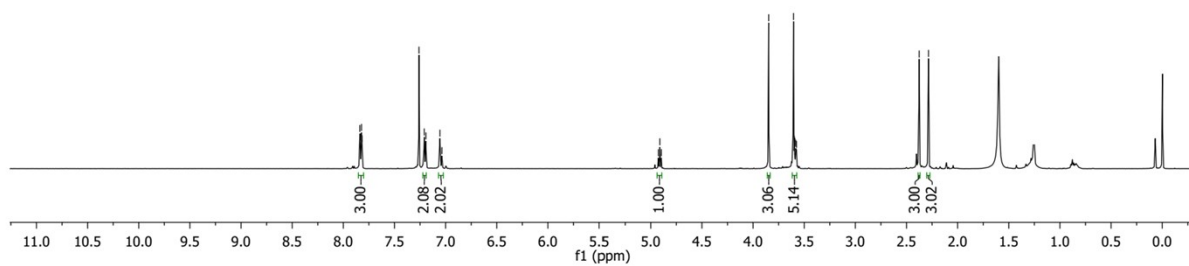

HBH-346-P-13C.3.fid

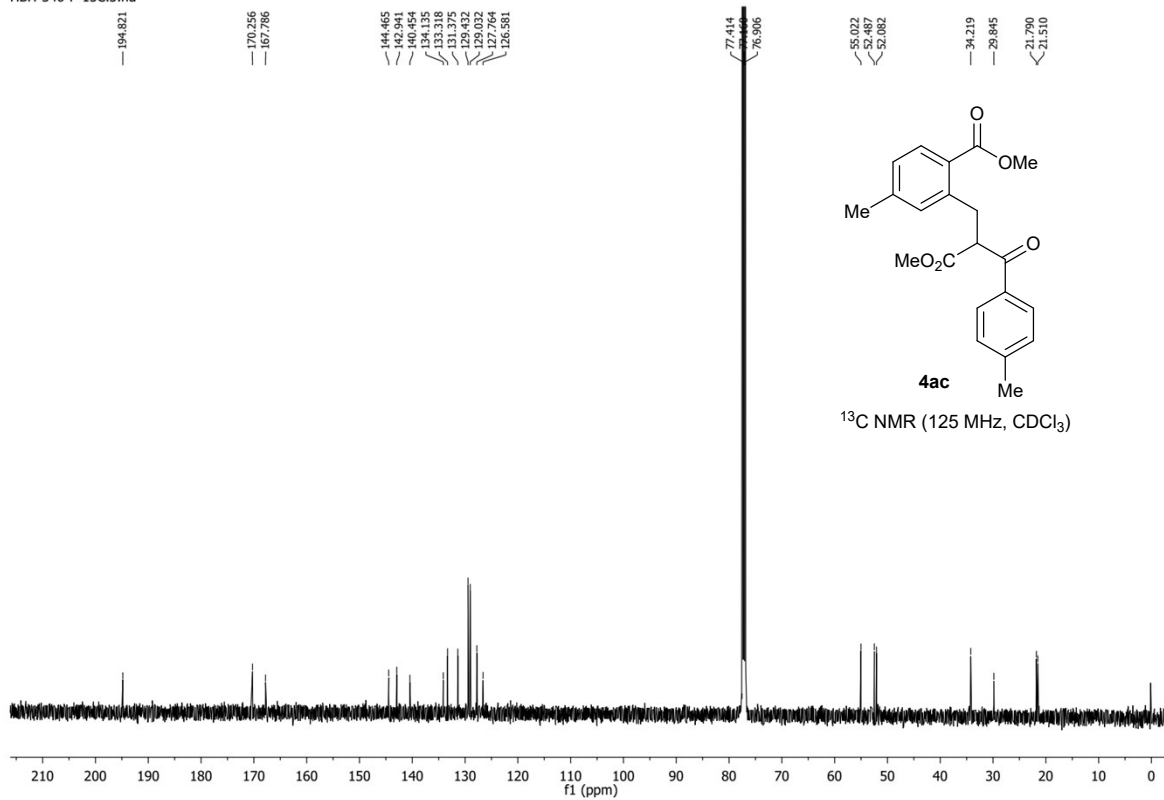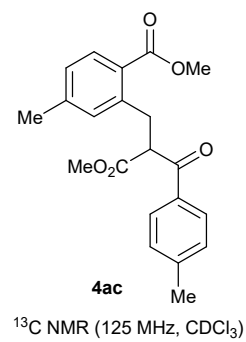

HBH-347-P-1H.1.fid

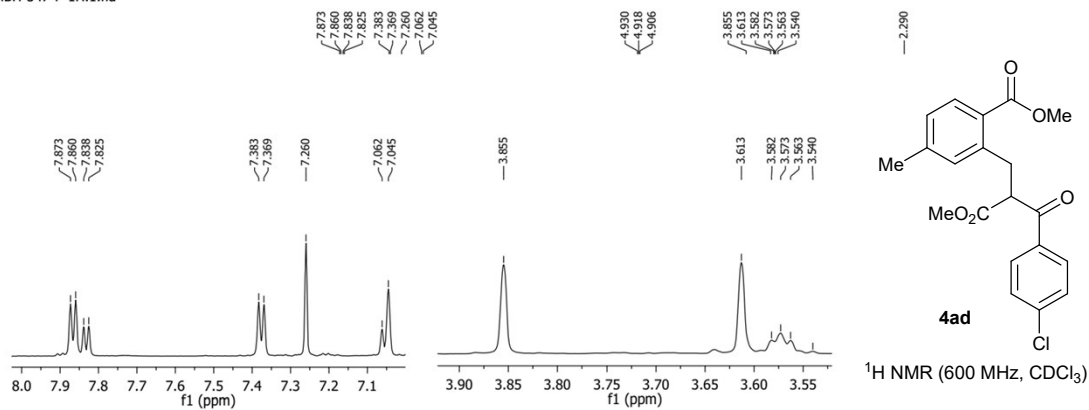

HBH-347-P-13C.3.fid

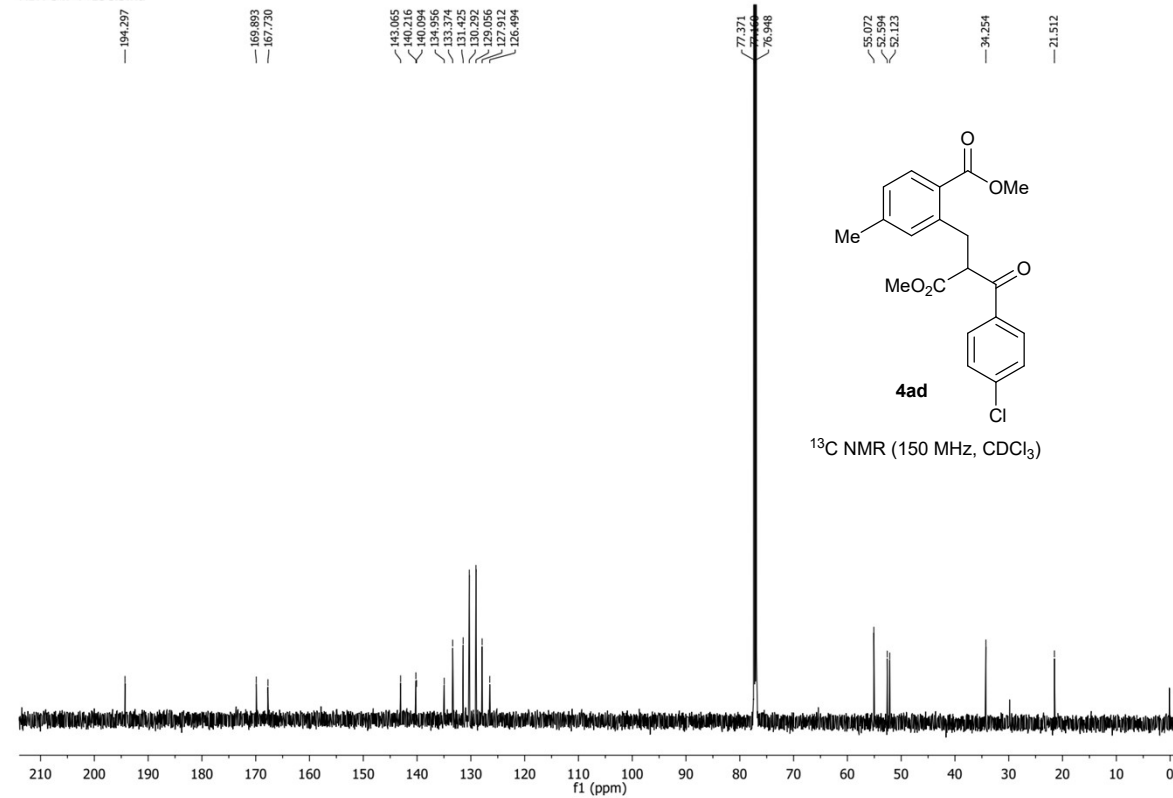



HBH-377-P2-1H.1.fid

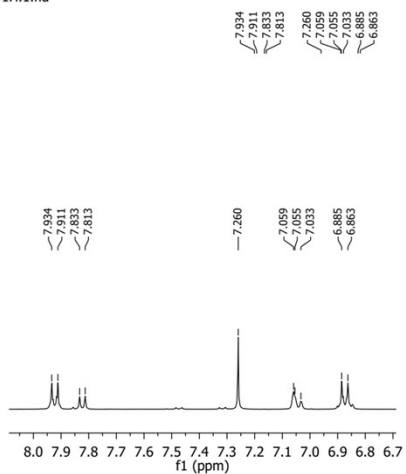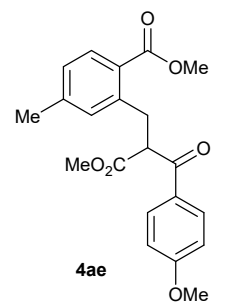

<sup>1</sup>H NMR (400 MHz, CDCl<sub>3</sub>)

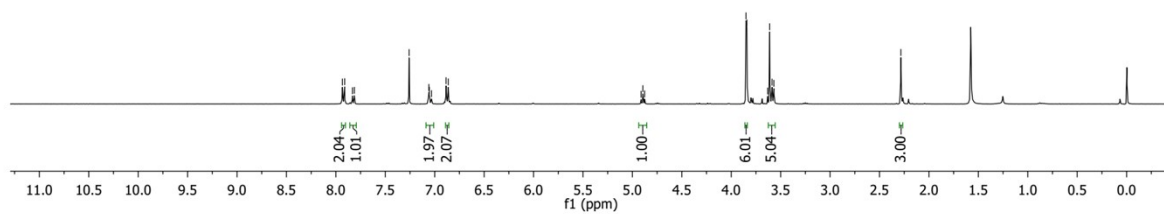

HBH-377-P-2-13C.1.fid

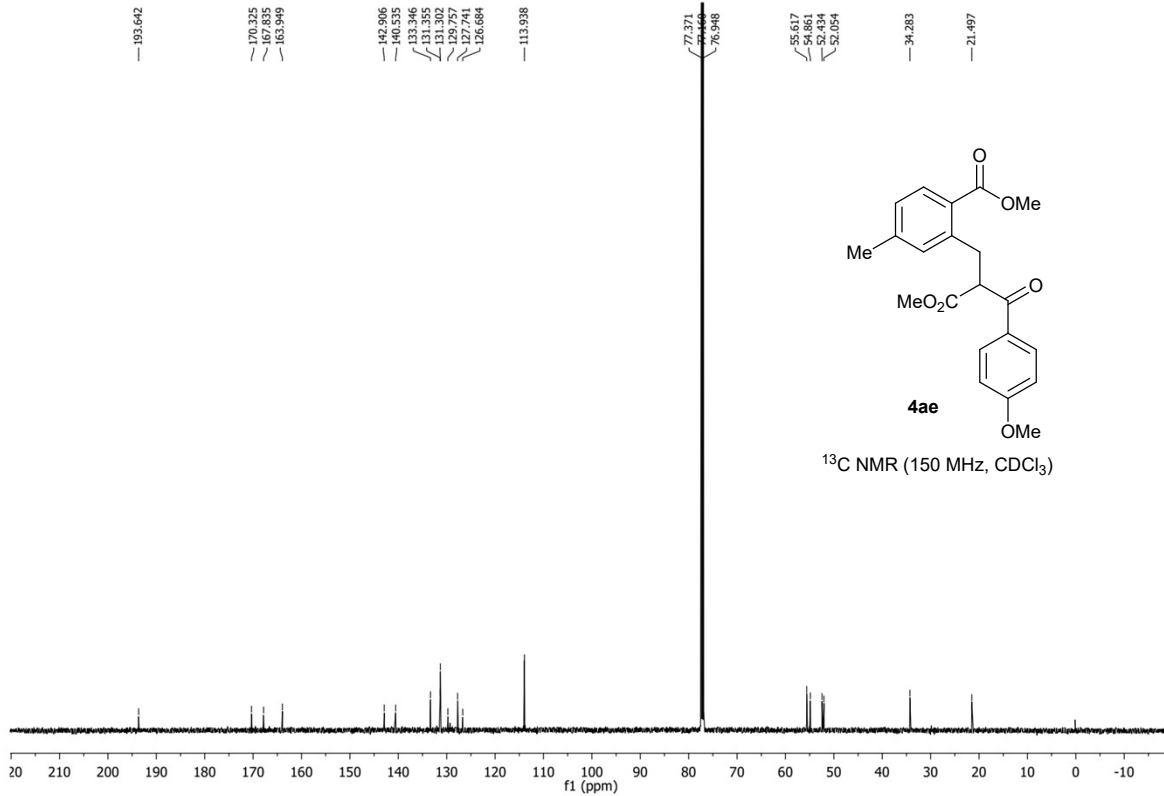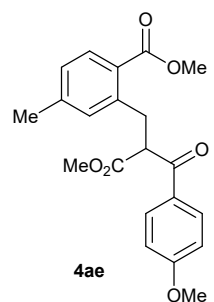

<sup>13</sup>C NMR (150 MHz, CDCl<sub>3</sub>)

HBH-292-B-1-1H.1.fid

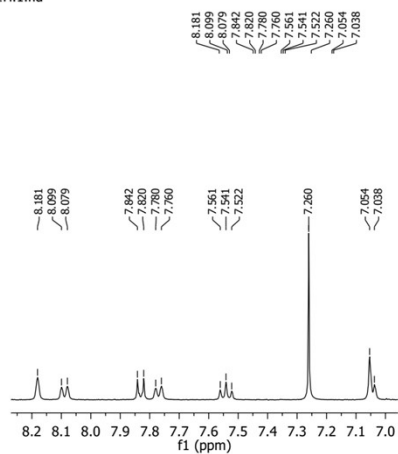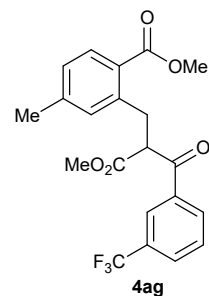

<sup>1</sup>H NMR (400 MHz, CDCl<sub>3</sub>)

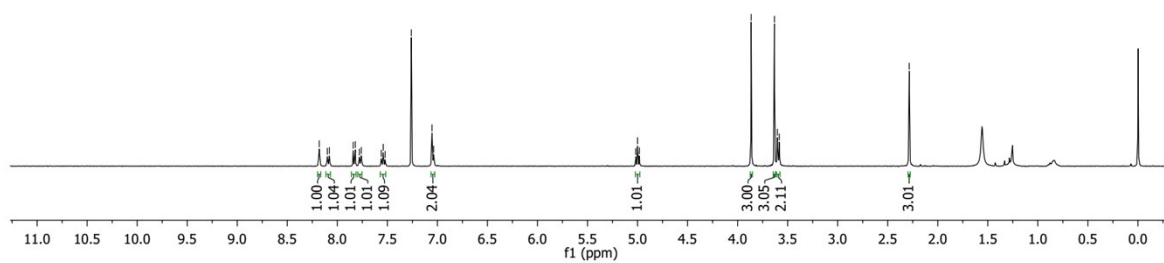

HBH-292-B-13C.12.fid

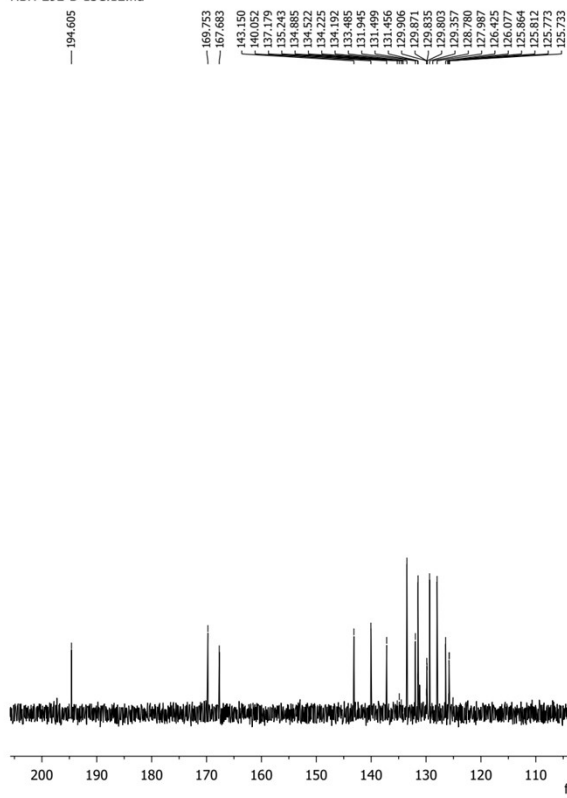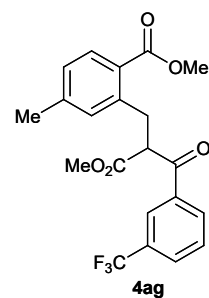

<sup>13</sup>C NMR (100 MHz, CDCl<sub>3</sub>)

HBH-292-B-1-19F.1.fid

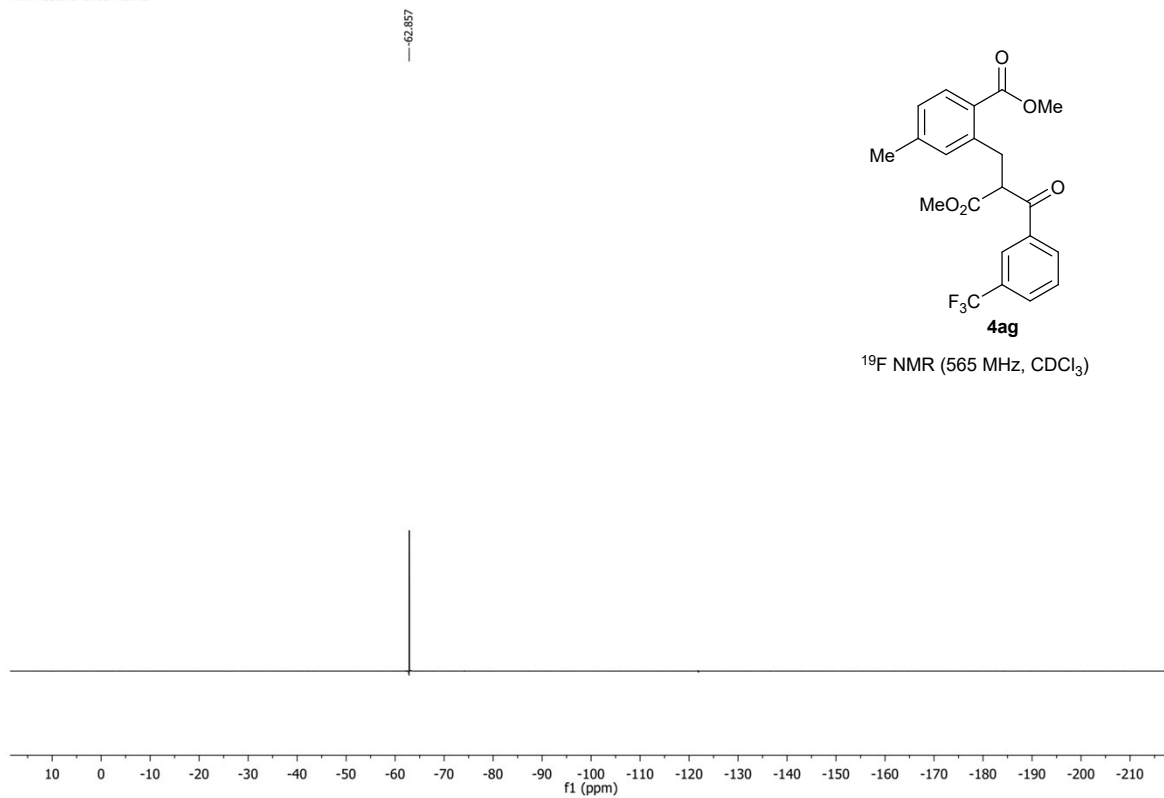

HBH-272-P\_1H.10.fid

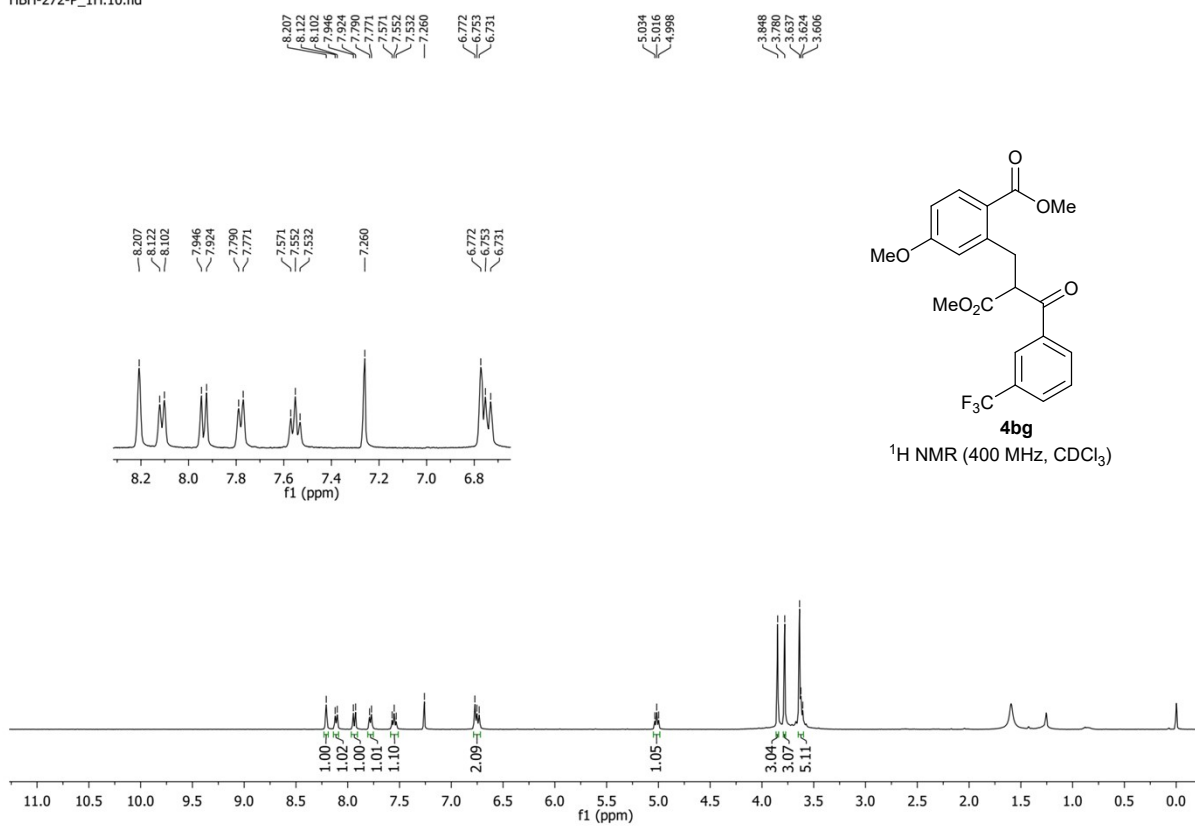

HBH-272-P\_13C.12.fid

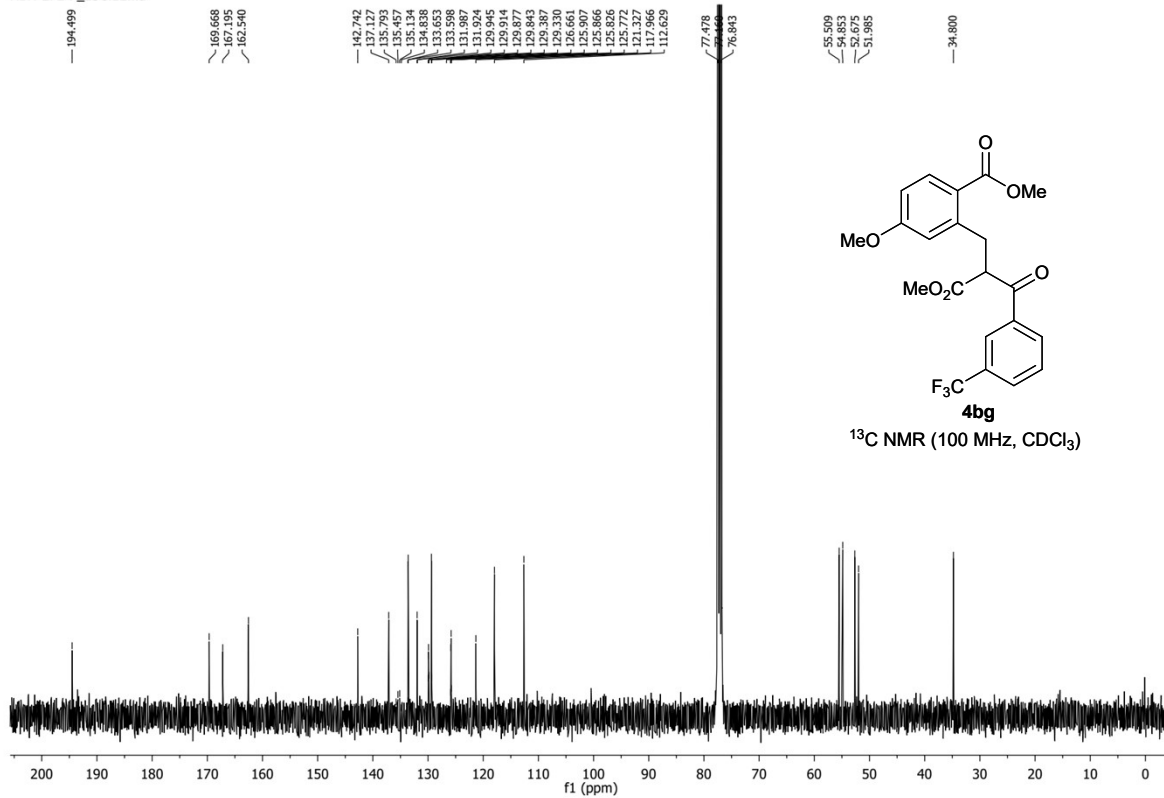

HBH-272-P-19F.1.fid

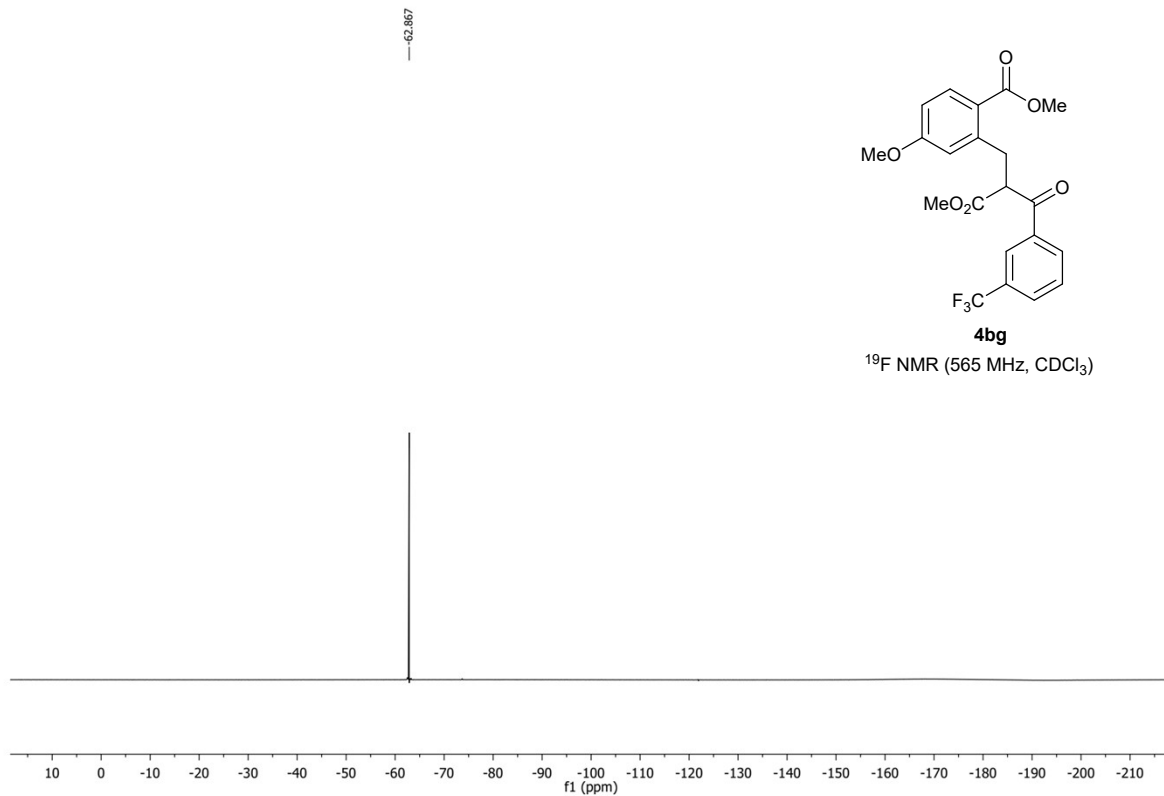

HBH-338-P-1H.1.fid

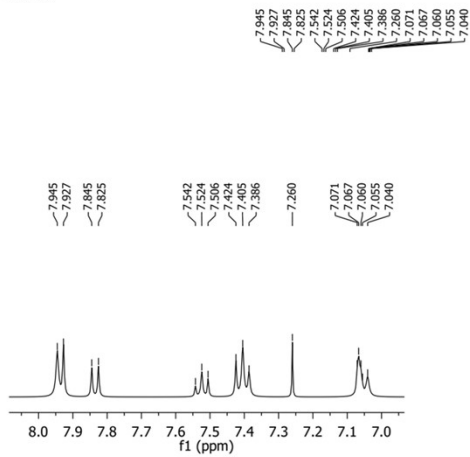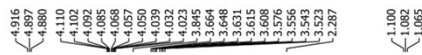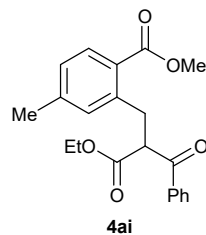

<sup>1</sup>H NMR (400 MHz, CDCl<sub>3</sub>)

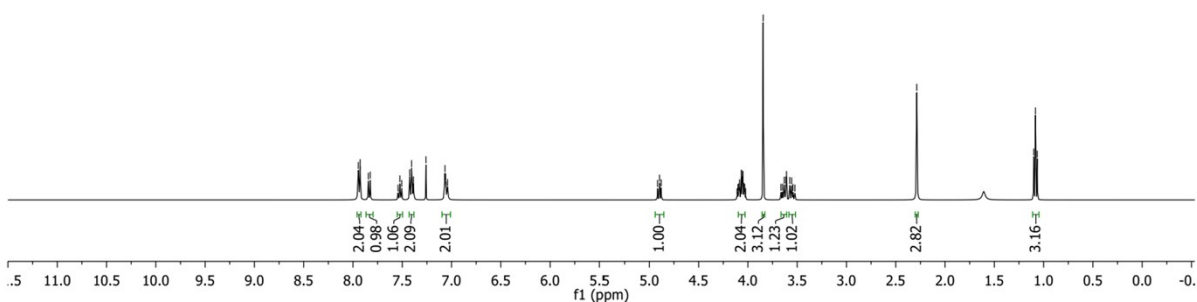

HBH-338-P-13C.3.fid

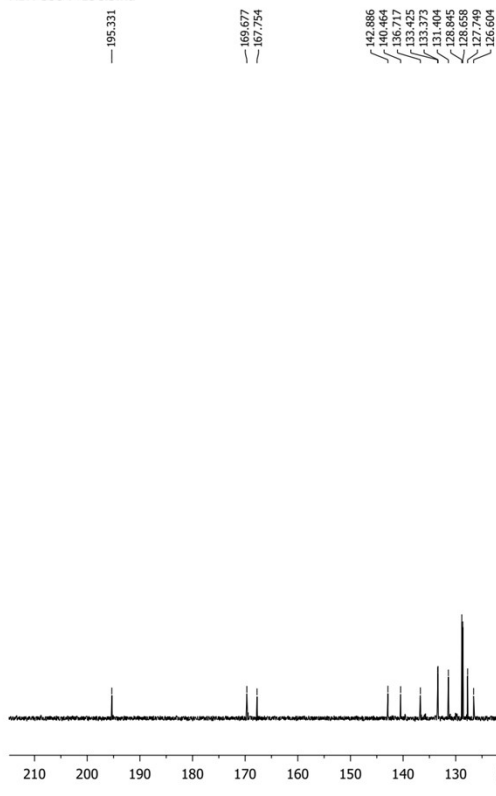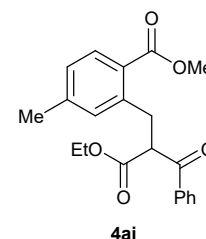

<sup>13</sup>C NMR (125 MHz, CDCl<sub>3</sub>)

HBH-339-P-2-1H.1.fid

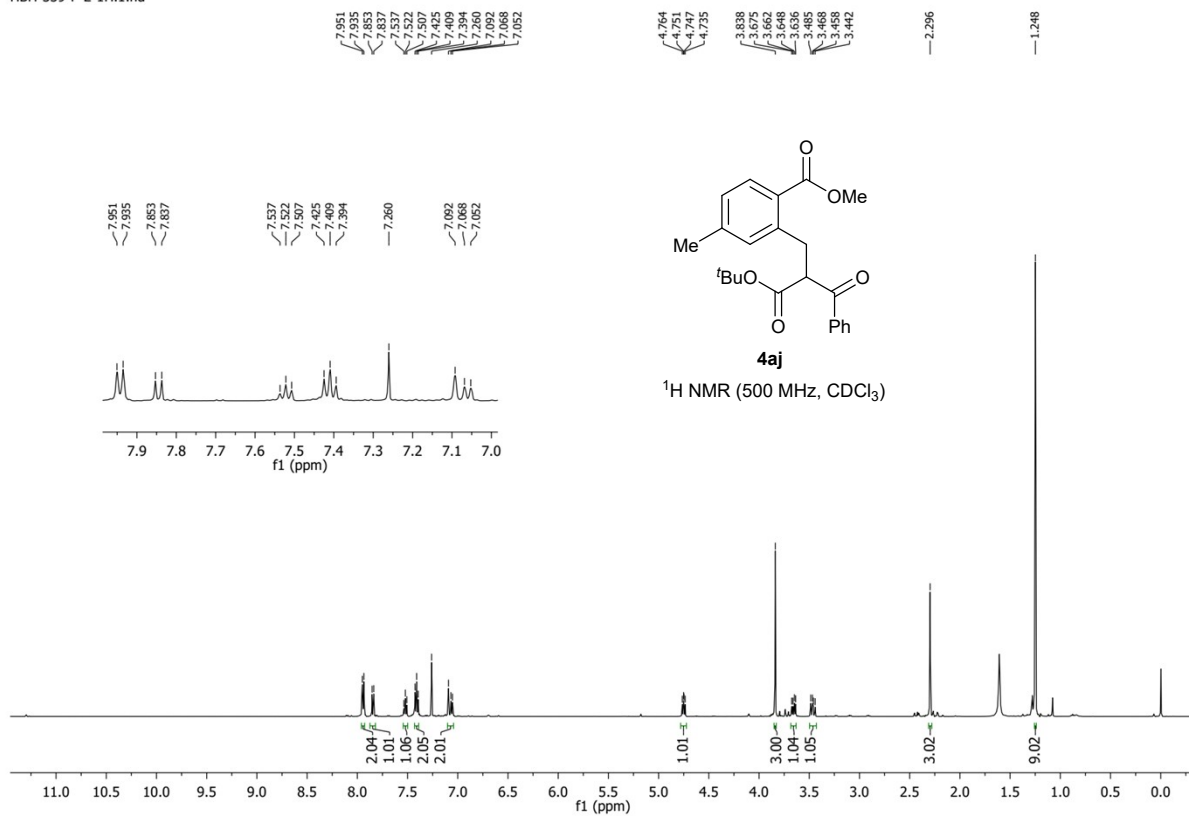

HBH-339-P-2-13C.3.fid

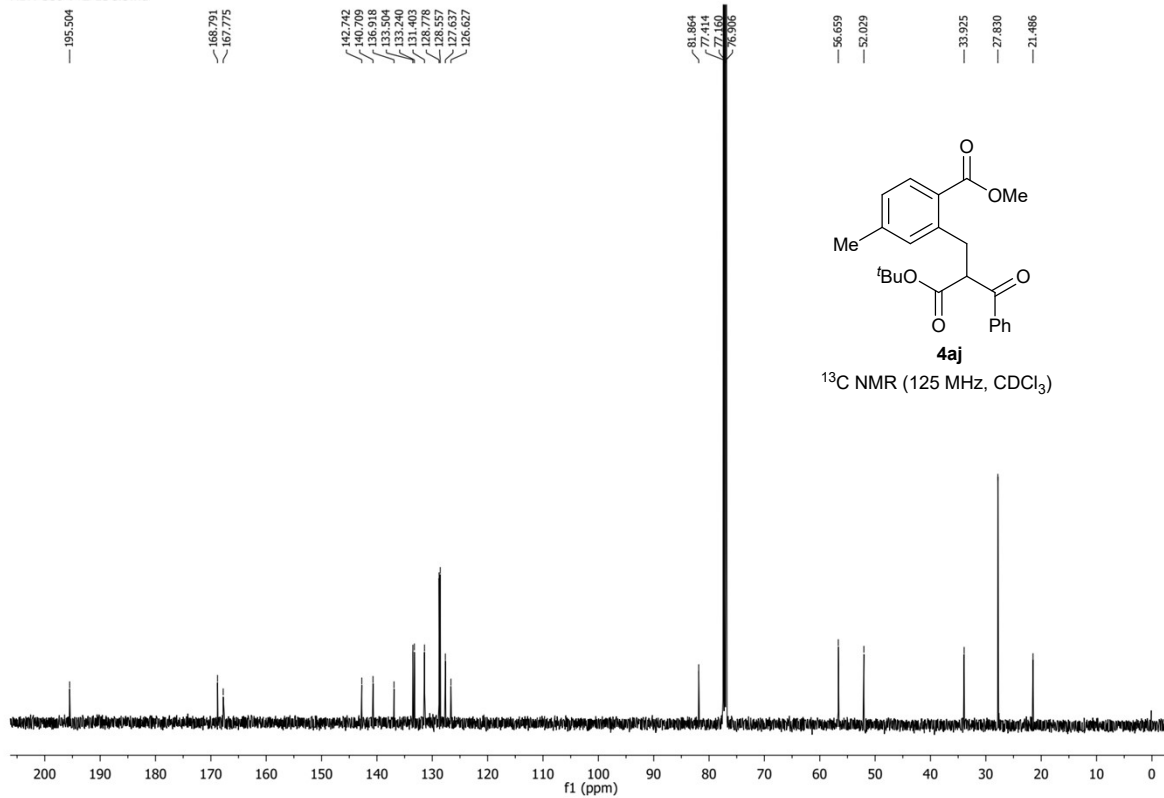







HBH-305-P-R-1H.1.fid

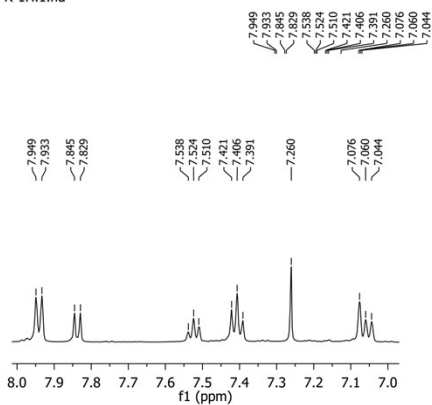

4.513  
4.899  
4.894  
3.987  
3.985  
3.987  
3.981  
3.974  
3.968  
3.963  
3.964  
3.951  
3.638  
3.624  
3.567  
3.552  
3.525  
2.293

1.447  
1.444  
1.435  
1.411  
1.253  
1.154  
1.089  
0.895  
0.886  
0.868

7.949  
7.833  
7.845  
7.829  
7.538  
7.524  
7.510  
7.421  
7.406  
7.391  
7.260  
7.076  
7.060  
7.044

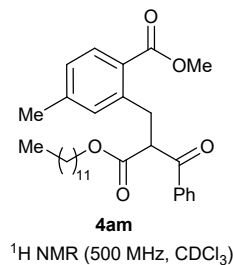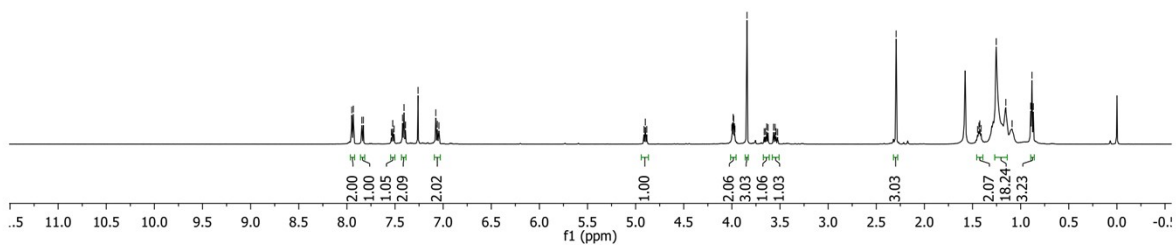

HBH-305-P-R-13C.3.fid

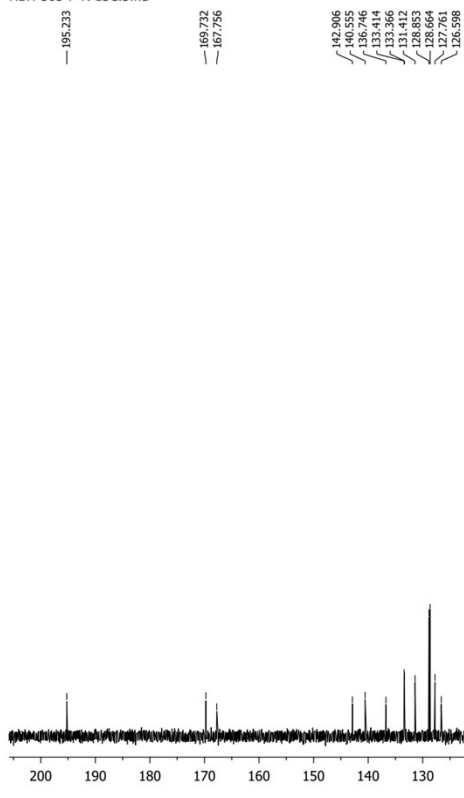

77.414  
77.414  
76.906  
65.604

55.900  
52.058  
34.01  
32.945  
29.788  
29.767  
29.679  
29.591  
29.565  
29.382  
28.831  
25.816  
22.836  
21.519  
14.265

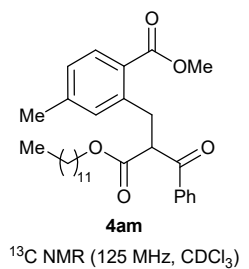



HBH-341-A-1H.1.fid

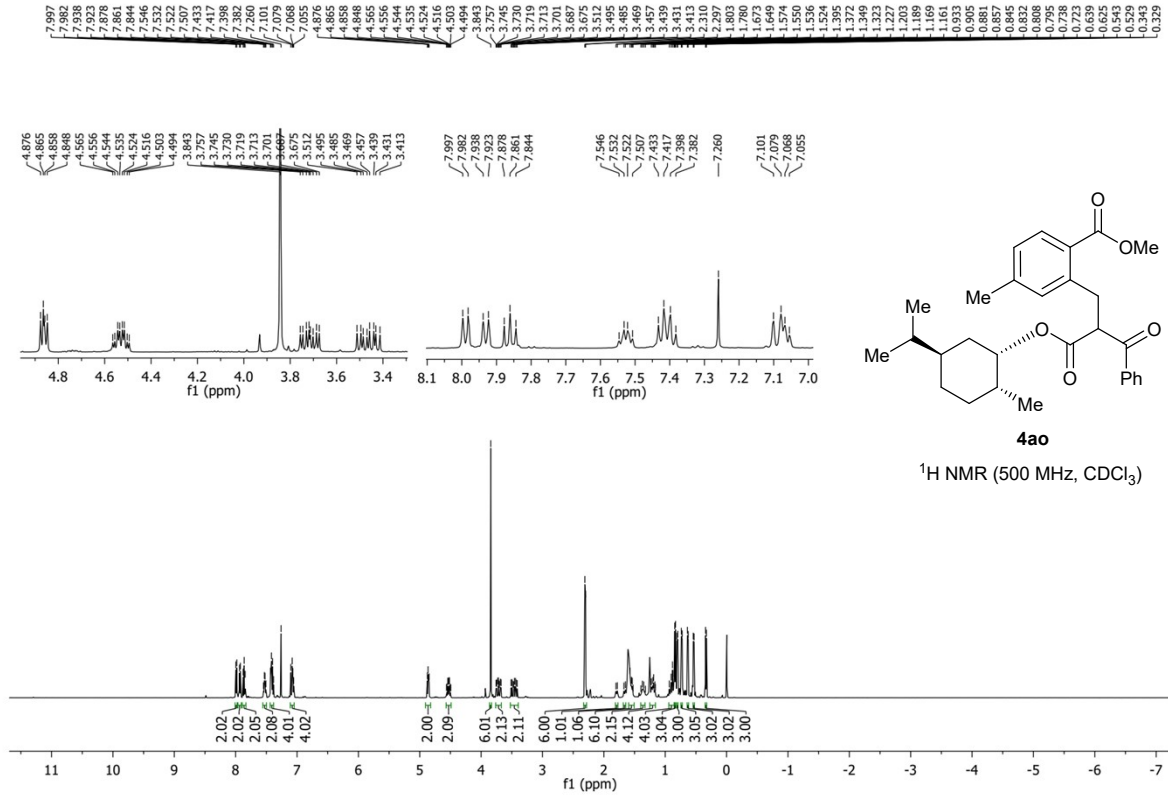

HBH-341-A-13C.3.fid

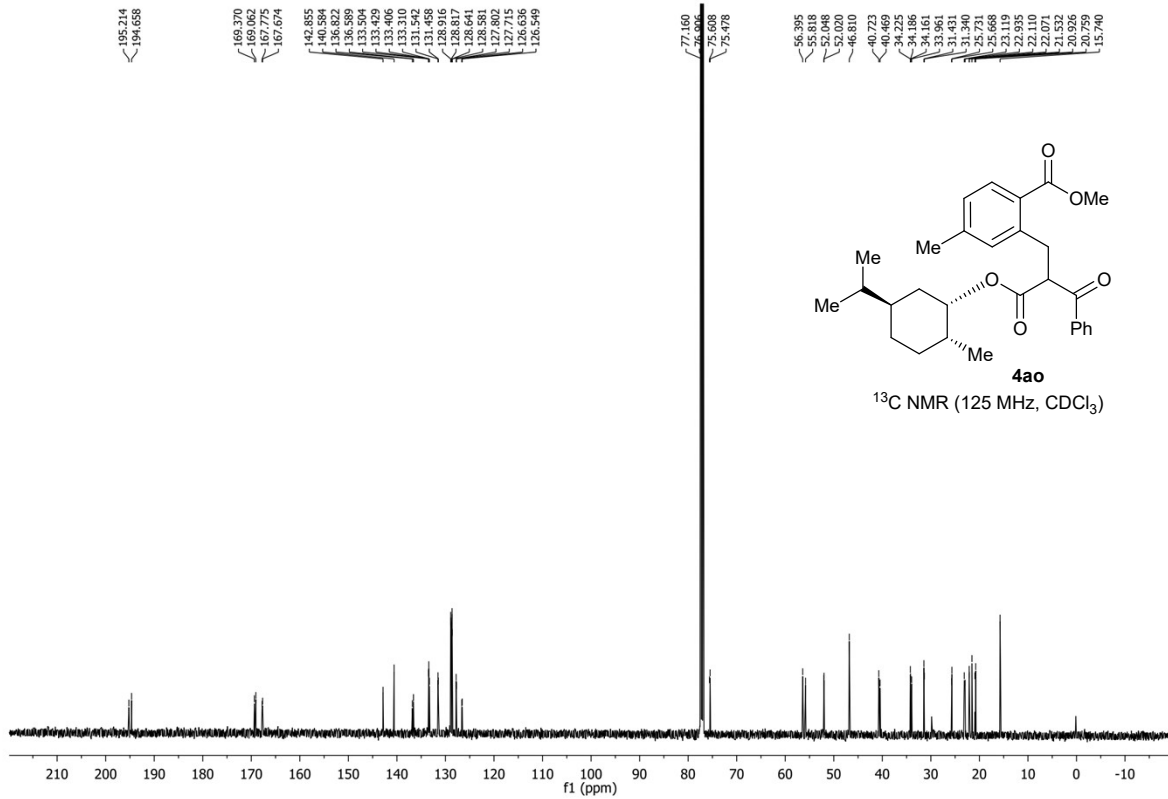

HBH-314-P-1H.1.fid

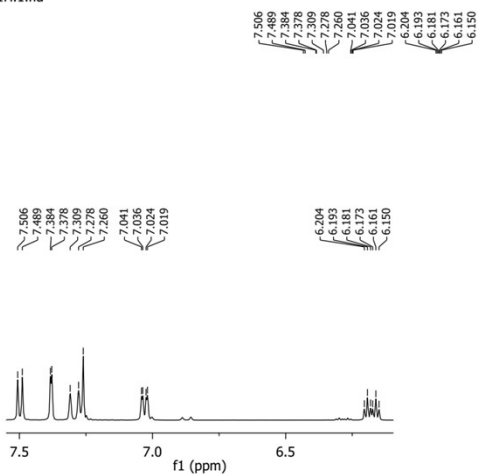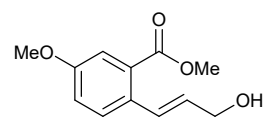

<sup>1</sup>H NMR (500 MHz, CDCl<sub>3</sub>)

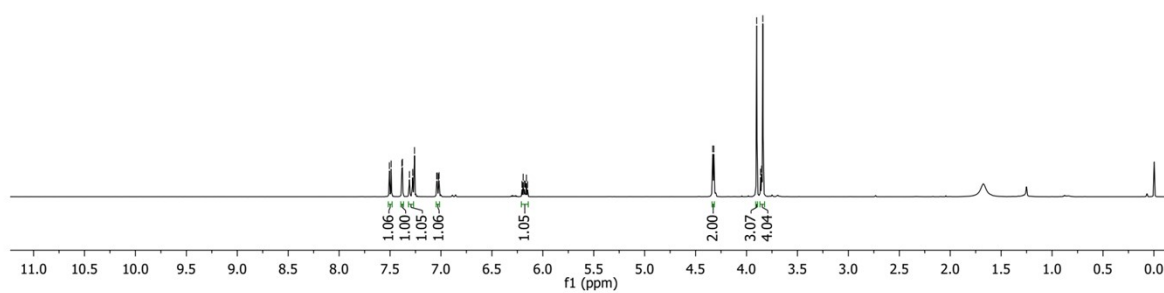

HBH-314-P-13C.3.fid

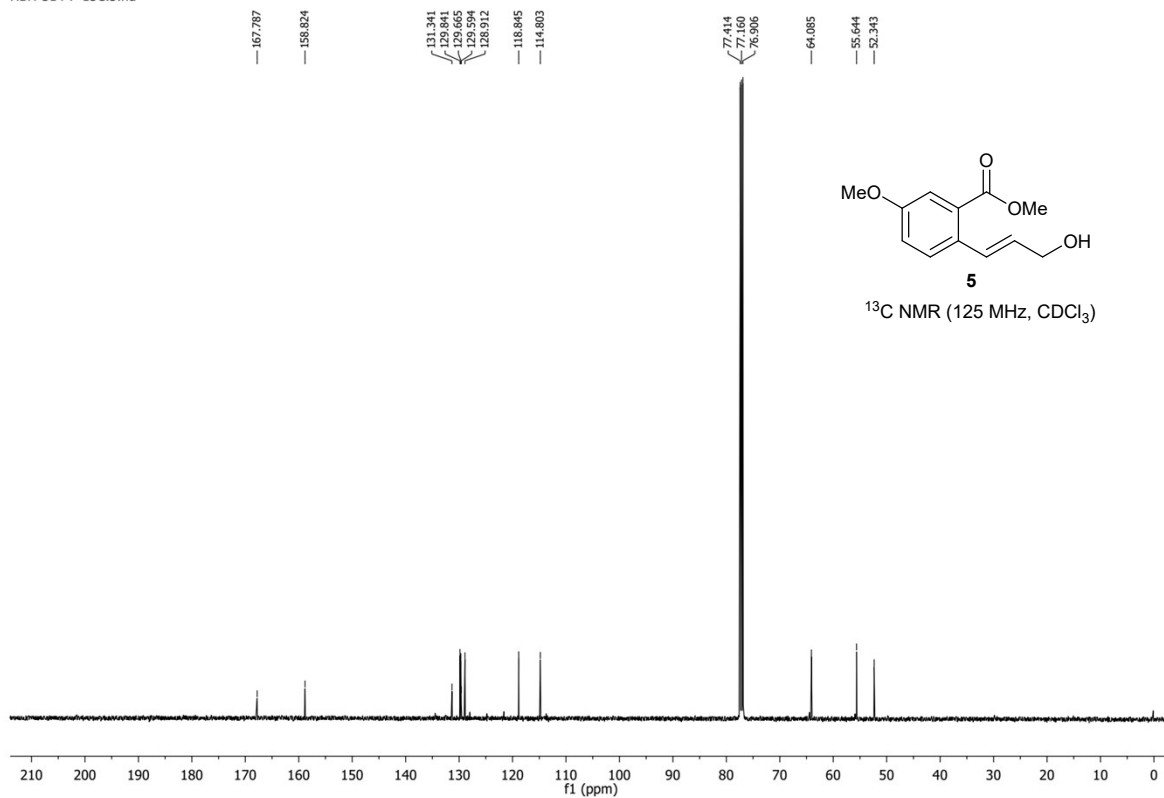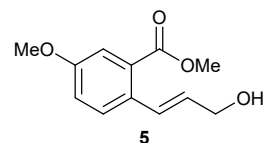

<sup>13</sup>C NMR (125 MHz, CDCl<sub>3</sub>)

HBH-315-A\_1H.10.fid

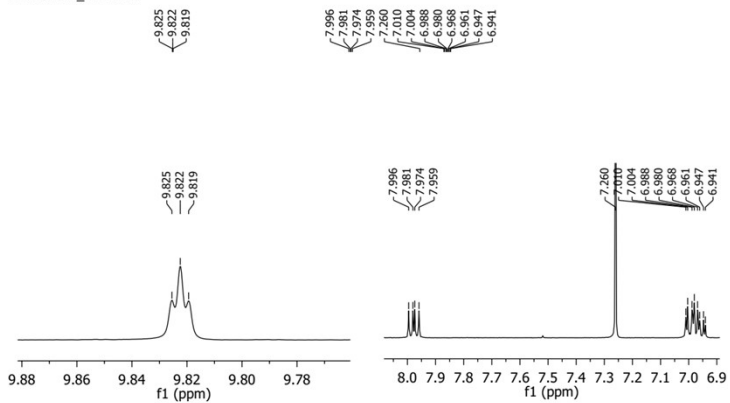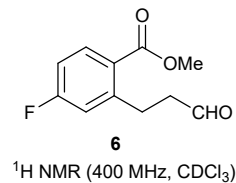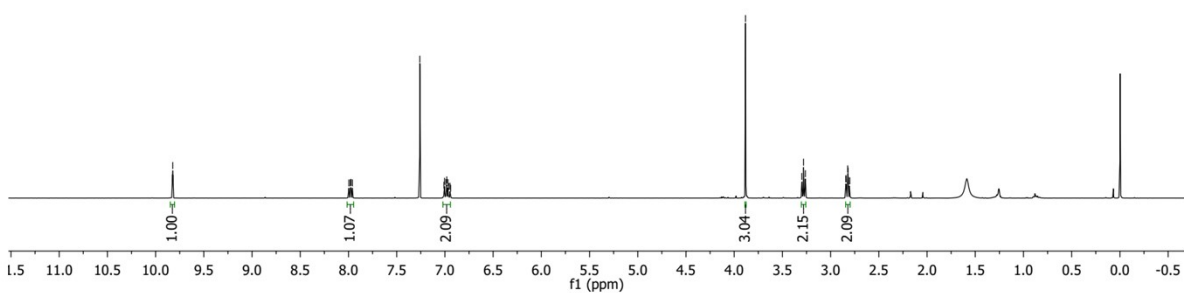

HBH-315-A\_13C.12.fid

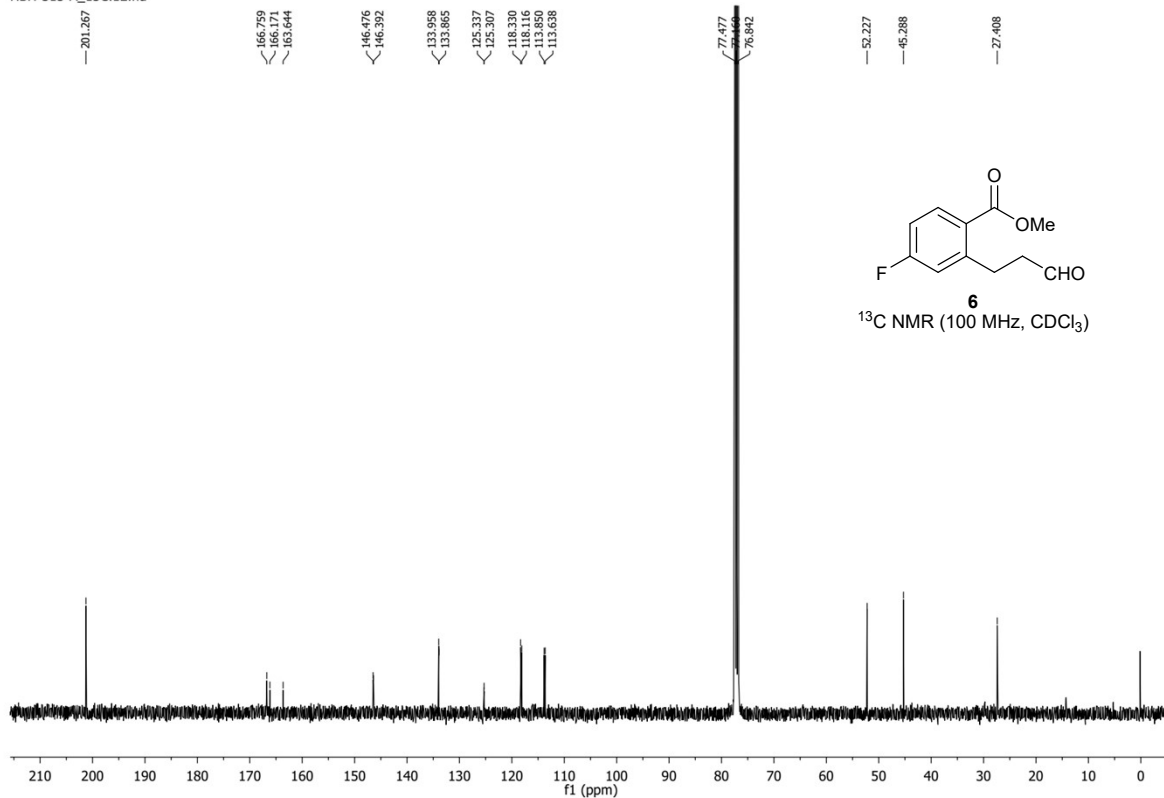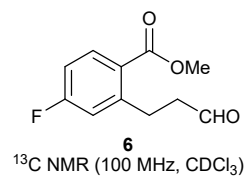

HBH-315-A-19F.1.fid

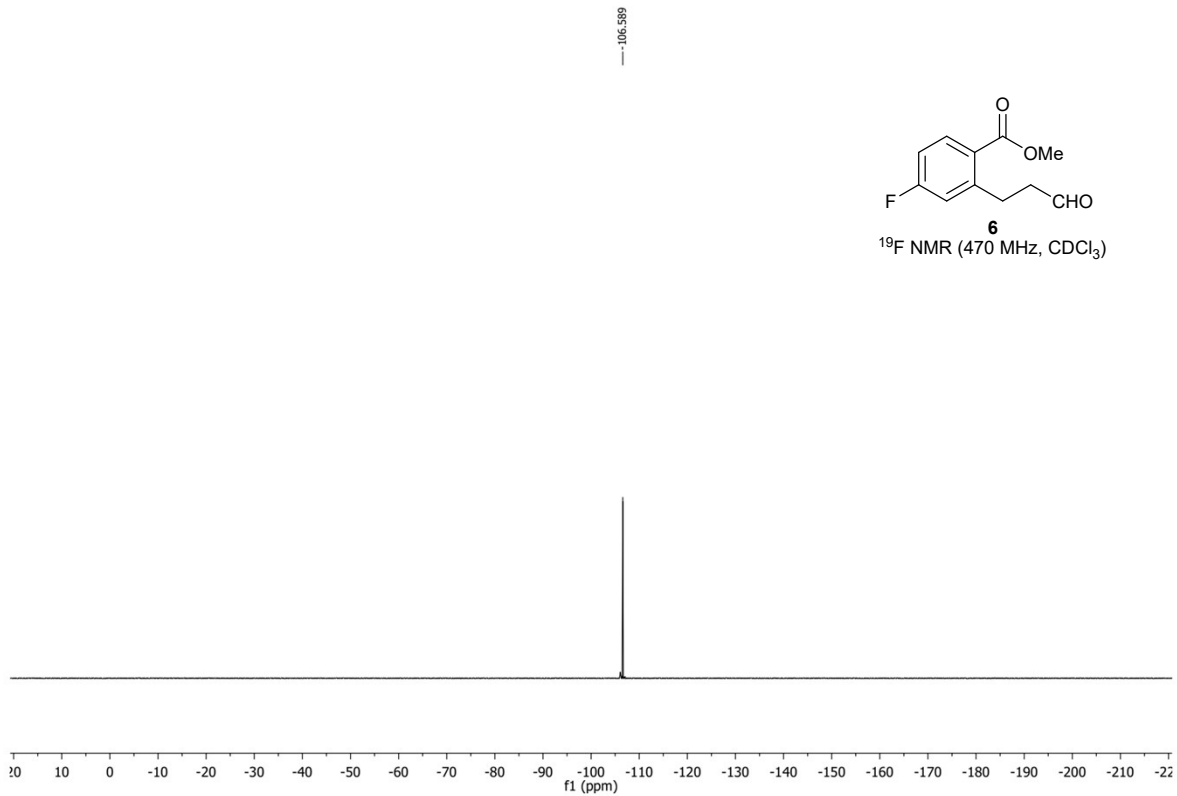

HBH-348-B-1H.1.fid

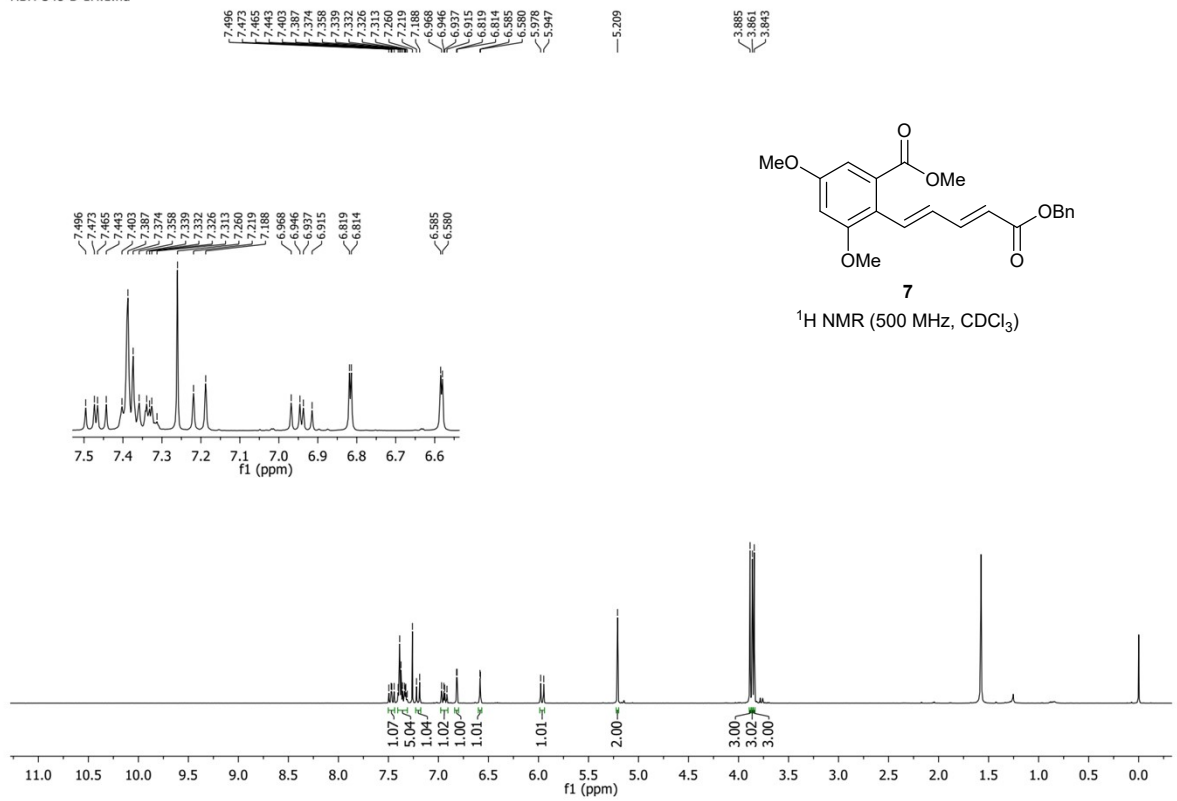

HBH-348-B-13C.3.fid

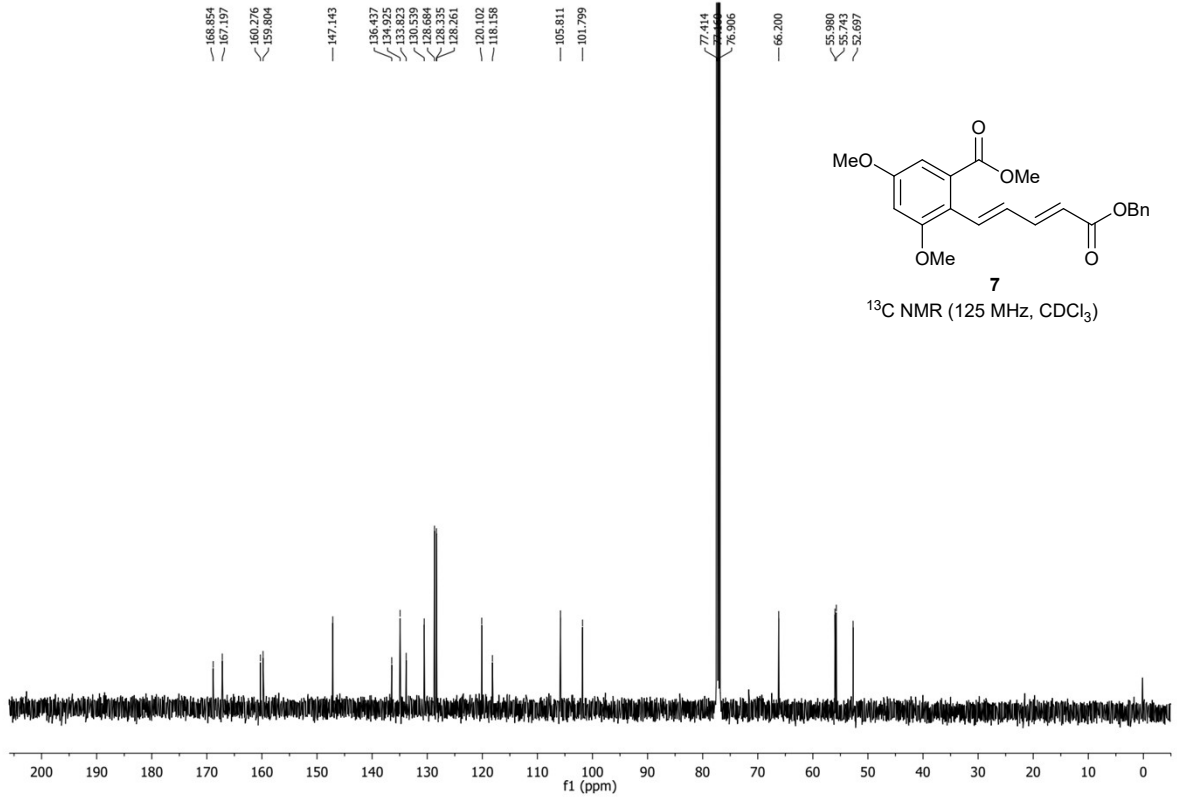

HBH-248-C\_1H.10.fid

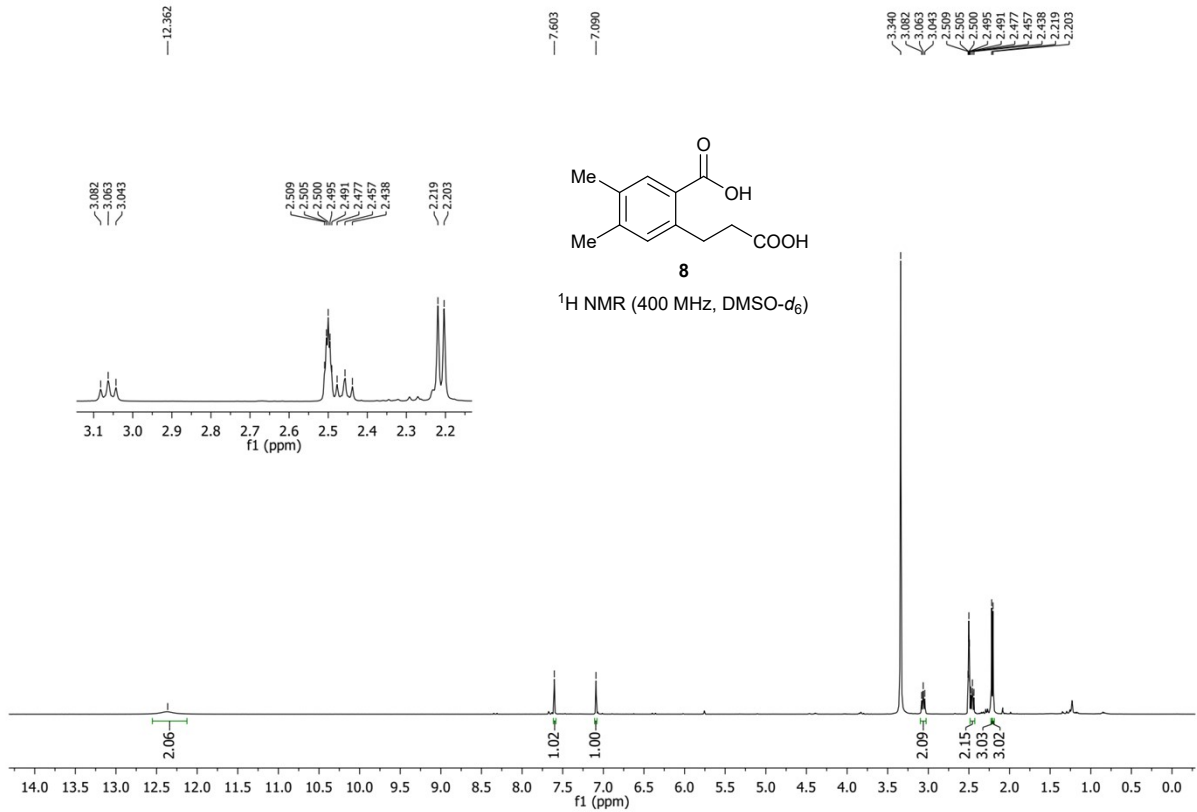

HBH-248-C\_13C.12.fid

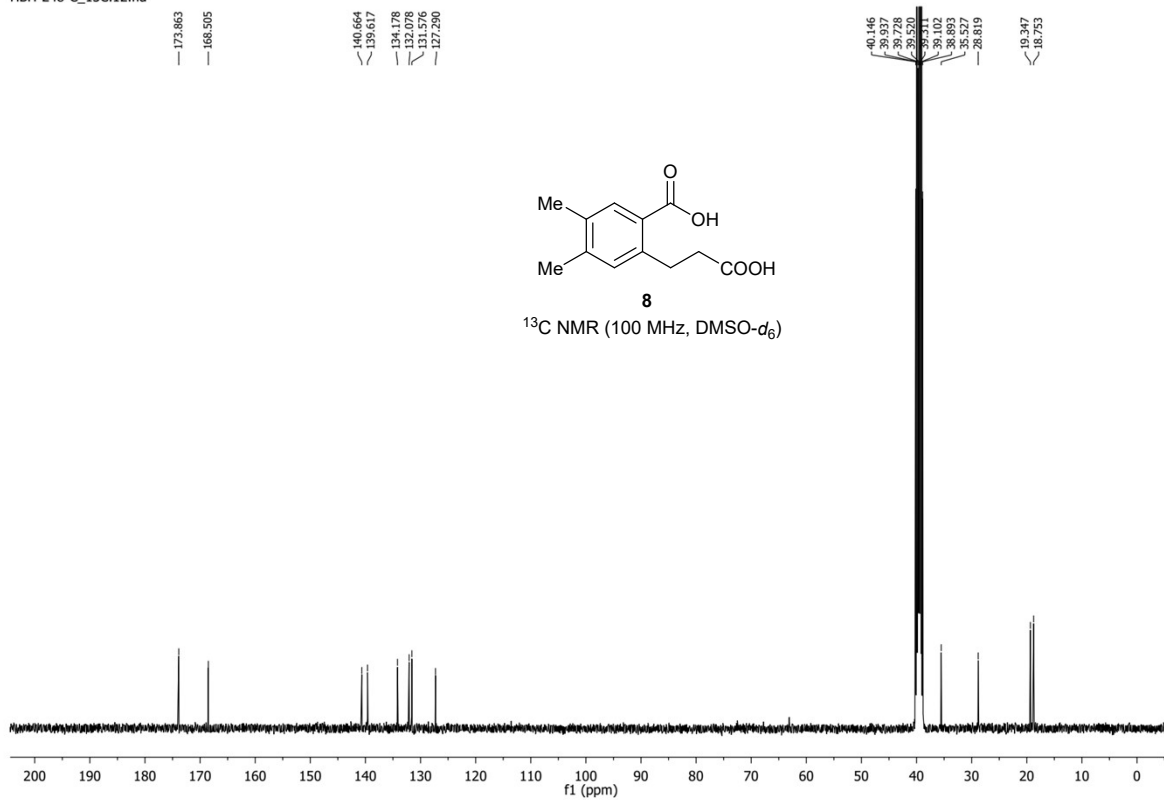

HBH-350-P-1H.17.fid

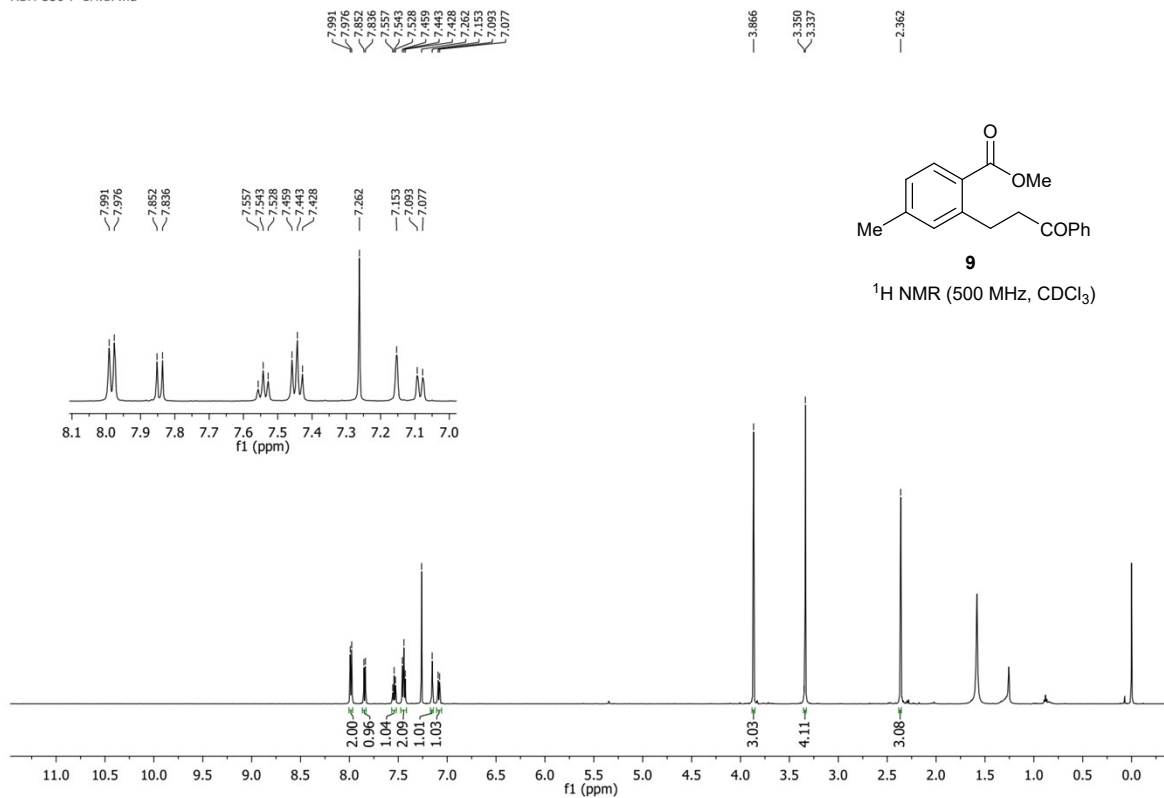



HBH-350-P-13C.18.fid

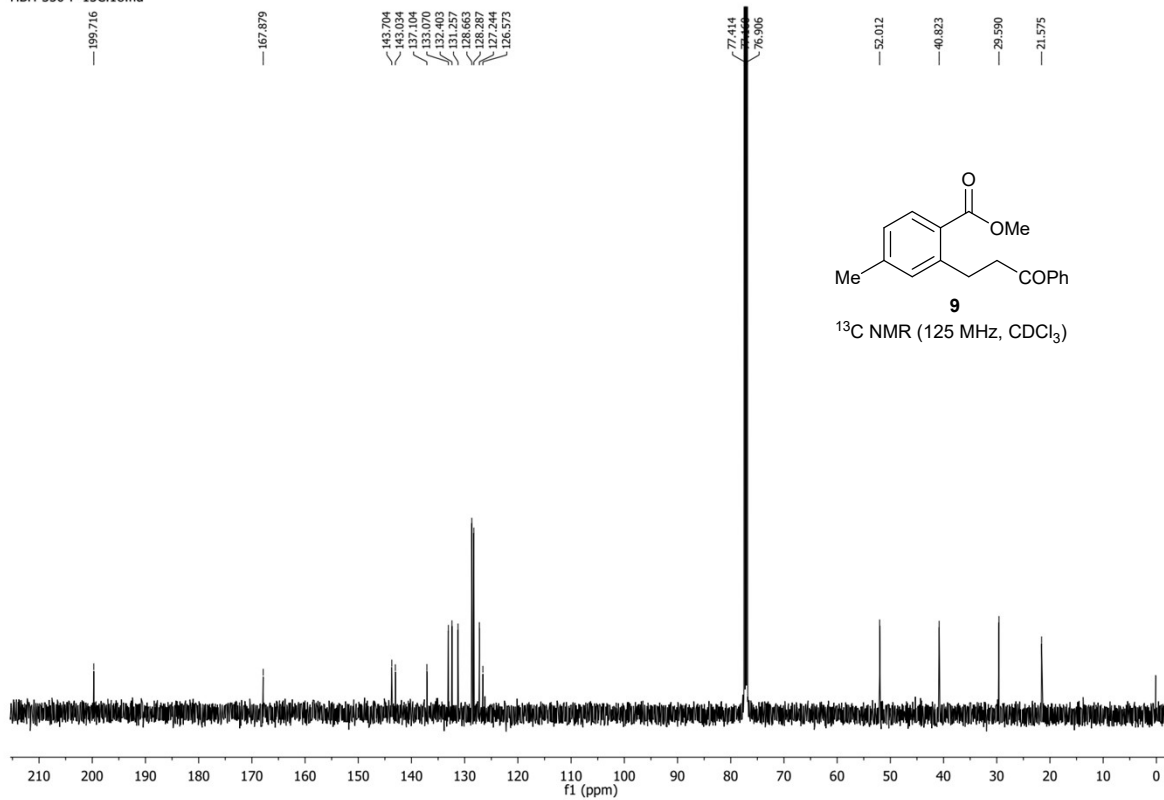

Supplement: d4cc06691j1.pdf [file d4cc06691j1.pdf]
